## **AcrIIA22 is a novel anti-CRISPR that impairs SpyCas9 activity by relieving DNA torsion of target plasmids**

Kevin J. Forsberg<sup>a,b,\*</sup>, Danica T. Schmidtke<sup>a</sup>, Rachel Werther<sup>a</sup>, Deanna Hausman<sup>a</sup>, Barry L. Stoddard<sup>a</sup>, Brett K. Kaiser<sup>a,c</sup>, Harmit S. Malik<sup>a,b</sup>

<sup>a</sup>Division of Basic Sciences & <sup>b</sup>Howard Hughes Medical Institute, Fred Hutchinson Cancer Research Center, Seattle, WA, 98109 USA; <sup>c</sup>Department of Biology, Seattle University, 901 12th Avenue, Seattle, WA 98122, USA

Running title: Altering DNA torsion can protect plasmids from Cas9

\*Address correspondence to: Kevin J. Forsberg, 1100 Fairview Avenue N. A2-205, Seattle WA 98109; (206) 667-4512; email: [kforsber@fredhutch.org](mailto:kforsber@fredhutch.org)

## 1 Abstract

2 To overcome CRISPR-Cas defense systems, many phages and mobile genetic elements  
3 encode CRISPR-Cas inhibitors called anti-CRISPRs (Acrs). Nearly all mechanistically  
4 characterized Acrs directly bind their cognate Cas protein to inactivate CRISPR immunity.  
5 Here, we describe AcrIIA22, an unconventional Acr found in hypervariable genomic  
6 regions of *Clostridial* bacteria and their prophages from the human gut microbiome.  
7 Uncovered in a functional metagenomic selection, AcrIIA22 does not bind strongly to  
8 SpyCas9 but nonetheless potently inhibits its activity against plasmids. To gain insight  
9 into its mechanism, we obtained an X-ray crystal structure of AcrIIA22, which revealed  
10 homology to PC4-like nucleic-acid binding proteins. This homology helped us deduce that  
11 *acrIIA22* encodes a DNA nickase that relieves torsional stress in supercoiled plasmids,  
12 rendering them less susceptible to SpyCas9, which is highly dependent on negative  
13 supercoils to form stable R-loops. Modifying DNA topology may provide an additional  
14 route to CRISPR-Cas resistance in phages and mobile genetic elements.

## 15 Introduction

16 CRISPR-Cas systems in bacteria and archaea confer sequence-specific immunity against  
17 invading phages and other mobile genetic elements (MGEs)<sup>1,2</sup>. In response, MGEs can  
18 circumvent CRISPR-Cas systems by evading CRISPR immunity. In its simplest form, evasion  
19 requires only a single mutation to a CRISPR target site, which allows a phage or MGE to escape  
20 immune recognition<sup>3</sup>. However, CRISPR-Cas systems routinely acquire new spacer sequences  
21 to target new sites within phage and MGE genomes<sup>1</sup>. This means that any single-site evasion  
22 strategy is likely to be short-lived. Thus, phages also employ forms of CRISPR-Cas evasion that  
23 are less easily subverted. For instance, some jumbophages assemble a proteinaceous, nucleus-  
24 like compartment around their genomes upon infection, allowing them to overcome diverse  
25 bacterial defenses, including CRISPR-Cas and restriction-modification (RM) systems<sup>4,5</sup>. Similarly,  
26 other phages decorate their DNA genomes with diverse chemical modifications, which can  
27 prevent Cas nucleases from binding their target sequence, such as the glucosylated cytosines  
28 used by phage T4 of *Escherichia coli*<sup>6</sup>.

29 MGEs may also overcome CRISPR-Cas systems by inactivating, rather than evading,  
30 CRISPR immunity. MGEs encode diverse CRISPR-Cas inhibitors called anti-CRISPRs (Acrs),  
31 which allow them to overcome CRISPR-Cas systems and infect otherwise immune hosts<sup>7</sup>. Most  
32 known Acrs bind Cas proteins and inhibit Cas activity by either restricting access to target DNA,  
33 preventing necessary conformational changes, or inactivating critical CRISPR-Cas  
34 components<sup>8,9</sup>. The direct inactivation of Cas proteins by Acrs has proven an effective and  
35 widespread strategy for overcoming CRISPR immunity<sup>10</sup>.

36 Recent genetic, bioinformatic, and metagenomic strategies have identified many Acrs that  
37 independently target the same CRISPR-Cas system<sup>7-10</sup>. Yet, most CRISPR-Cas systems are not  
38 inhibited by known Acrs<sup>10</sup>. Thus, many undiscovered strategies to inhibit or evade CRISPR-Cas  
39 systems probably exist in nature. Indeed, over half of the genes in an average phage genome  
40 have no known function<sup>11</sup>. To uncover new counter-immune strategies, we recently devised a  
41 high-throughput functional metagenomic selection to find genes that protect a target plasmid from  
42 *Streptococcus pyogenes* Cas9 (SpyCas9), the variant used most frequently for genome editing<sup>12</sup>.  
43 Our selection strategy was designed to reveal any gene capable of overcoming SpyCas9 activity  
44 in this system, regardless of mechanism. With this approach, we previously described a new



45 phage inhibitor of SpyCas9, called AcrIIA11, which acts via a novel mechanism and is prevalent  
46 across human gut microbiomes<sup>12</sup>.

47 Here, we describe AcrIIA22, which was the second most common Acr candidate recovered  
48 from our original functional selection. AcrIIA22 encodes a 54 amino acid protein that impairs  
49 SpyCas9 activity. We observe that homologs of *acrIIA22* are found in hypervariable loci in phage  
50 and bacterial genomes. Unlike most other Acrs, AcrIIA22 does not bind strongly to SpyCas9 *in*  
51 *vitro*. Instead, guided by an X-ray crystal structure of AcrIIA22, we show that AcrIIA22 encodes a  
52 DNA nickase. By nicking a supercoiled plasmid substrate and relieving its torsional stress,  
53 AcrIIA22 renders the target less susceptible to SpyCas9 activity. AcrIIA22 thus represents a novel  
54 mechanism of SpyCas9 evasion, which capitalizes on SpyCas9's uniquely stringent requirement  
55 for negative supercoils to form a productive R-loop<sup>13-16</sup>. Such a resistance mechanism could be  
56 accessible to diverse MGEs, providing a route to CRISPR-Cas tolerance in many genetic  
57 contexts.

## 58 Results

### 59 Functional selection reveals a novel anti-CRISPR protein, AcrIIA22

60 We recently carried out a functional selection for SpyCas9 antagonism, recovering clones  
61 from metagenomic libraries that could potentially inhibit SpyCas9<sup>12</sup>. In this two-plasmid setup, we  
62 used an inducible SpyCas9 on an expression plasmid to cleave the *kanamycin resistance (Kan<sup>R</sup>)*  
63 gene of a second 'target' plasmid. We then grew cultures in SpyCas9-inducing conditions and  
64 measured the proportion of colony forming units (cfus) that remained kanamycin resistant (Figure  
65 1A). This proportion is a measure of how many clones retained their target plasmid and thus how  
66 effectively that plasmid withstood SpyCas9 attack. In our previously published work, we describe  
67 AcrIIA11, a novel anti-CRISPR from a metagenomic clone named F01A\_2 (Genbank ID  
68 MK637582.1), which was the most abundant from functional selection of a human fecal  
69 microbiome<sup>12</sup>. This functional selection also revealed a second protective clone, F01A\_4  
70 (Genbank ID MK637587.1). Together, these two contigs (F01A\_2 and F01A\_4) accounted for  
71 >96% of the normalized read coverage and were the most abundant clones recovered from this  
72 library.

73 The F01A\_4 contig is 685 bp long, encodes three potential open reading frames (ORFs),  
74 and confers complete protection against SpyCas9, with plasmid retention equaling that of an  
75 uninduced SpyCas9 control (Figure 1B). To determine the genetic basis for SpyCas9 antagonism  
76 in this contig, we introduced an early stop codon into each of the three potential ORFs and  
77 analyzed how these mutations affected the contig's ability to protect a target plasmid from  
78 SpyCas9. We found that an early stop codon in *orf\_1* reduced the proportion of *Kan<sup>R</sup>* cfus by a  
79 factor of 10<sup>5</sup>, matching the value observed for an empty vector control (Figure 1B). Furthermore,  
80 expression of *orf\_1* alone was also sufficient for SpyCas9 antagonism (Figure 1C), protecting a  
81 target plasmid from SpyCas9 cleavage as well as the potent SpyCas9 inhibitor, AcrIIA4. In this  
82 assay, *orf\_1* was slightly toxic when singly expressed in *E. coli*, reducing growth rate by 7%  
83 (Supplemental Figure 1). Combined, our results indicate that *orf\_1* completely accounts for the  
84 SpyCas9 protection phenotype of contig F01A\_4.

85 One trivial mechanism by which *orf\_1* could apparently antagonize SpyCas9 in our functional  
86 assay would be to lower its expression. To address this possibility, we carried out two  
87 experiments. First, we swapped the *spycas9* gene for *gfp* in our expression vector and asked  
88 whether *orf\_1* induction impacted fluorescence output. We saw no change in fluorescence upon

89 *orf\_1* induction, indicating that *orf\_1* neither suppressed transcription from our expression vector  
90 nor altered its copy number (Supplemental Figure 2). Second, we used Western blots to test  
91 whether *orf\_1* expression impacted SpyCas9 protein levels through the course of a plasmid  
92 protection assay. We used a crRNA that did not target our plasmid backbone to ensure that *orf\_1*  
93 expression remained high and its potential impact on SpyCas9 expression levels would be most  
94 evident. We observed that *orf\_1* expression had no meaningful effect on SpyCas9 expression at  
95 any timepoint. Thus, we conclude that *orf\_1* does not impact SpyCas9's translation or degradation  
96 rate (Supplemental Figure 2). Therefore, *orf\_1* must act via an alternative mechanism to inhibit  
97 SpyCas9 activity. Based on these findings, we conclude that *orf\_1* encodes a *bona fide* anti-  
98 CRISPR protein and hereafter refer to it as *acrIIA22*.

99 Next, we investigated whether *acrIIA22* could also allow phages to escape from SpyCas9  
100 immunity (Supplemental Figure 3). We measured SpyCas9's ability to protect *E. coli* from infection  
101 by phage Mu, in the presence or absence of *acrIIA22*. As a control, we carried out similar phage  
102 infections in the presence or absence of the well-established SpyCas9 inhibitor, *acrIIA4*. As  
103 anticipated, SpyCas9 significantly impaired Mu when targeted to the phage's genome but not if a  
104 non-targeting CRISPR RNA (crRNA) was used. Consistent with previous findings<sup>12</sup>, phage Mu  
105 could infect targeting and non-targeting strains equally well when we expressed *acrIIA4*, indicating  
106 that SpyCas9 immunity was completely abolished by this *acr*. However, *acrIIA22* could only  
107 partially restore the infectivity of phage Mu across multiple experimental conditions (Supplemental  
108 Figure 3). We therefore conclude that *acrIIA22* only weakly protects Mu phage from SpyCas9  
109 whereas it strongly protects plasmids against SpyCas9 cleavage.

## 110 **AcrIIA22 homologs are present in hypervariable regions of bacterial and prophage** 111 **genomes**

112 AcrIIA22 is 54 amino acids in length and has no sequence homology to any protein of known  
113 function, including all previously described Acrs. We examined the distribution of *acrIIA22*  
114 homologs in NCBI's NR and WGS databases but found just seven hits, limiting our ability to make  
115 evolutionary inferences about its origins or prevalence. We therefore expanded our search to  
116 include IMG/VR, a curated database of cultured and uncultured DNA viruses<sup>17</sup>, and assembly  
117 data from a meta-analysis of 9,428 diverse human microbiome samples<sup>18</sup>. With additional  
118 homologs from these databases in hand, we found that the majority of *acrIIA22* homologs exist in  
119 either of two genomic contexts: prophage genomes or small, bacterial genomic islands (Figures  
120 2A, 2B). The original metagenomic DNA fragment from our selection, F01A\_4, shared perfect  
121 nucleotide identity with one of these genomic islands (Figure 2B).

122 Because most *acrs* are found in phage genomes, we first examined the prophages that  
123 encoded AcrIIA22 homologs. These prophages were clearly related, based on many homologous  
124 genes and a similar genome organization (Figure 2A). Despite their similarity, we found these  
125 prophages inserted into several different bacterial loci, including one site between the bacterial  
126 genes *purF* and *radC* (locus #3, Figure 2A). This prophage insertion site is notable because it is  
127 nearly identical to the highly conserved sequences that flanked *acrIIA22*-encoding bacterial  
128 genomic islands (Figure 2B). Due to their common genomic loci, we hypothesized that the  
129 apparently bacterial *acrIIA22* homologs in these genomic islands diverged from a common phage  
130 ancestor, encoded by a prophage that previously integrated at this locus. We speculate that the  
131 original *acrIIA22*-encoding bacterial genomic island was left behind following the incomplete  
132 excision of an ancestral, *acrIIA22*-encoding prophage. Supporting this hypothesis, *acrIIA22*

133 homologs are always found at the end of prophage genomes, near their junction with a host  
134 bacterial genome (Figure 2A).

135 To better understand *acrIIA22*'s gene neighborhood, we again searched the raw assemblies  
136 of over 9,400 human microbiomes for more examples of these genomic islands<sup>18</sup>, but did not  
137 include *acrIIA22* in our second search criteria. Instead, we focused on the recent evolutionary  
138 history of these bacterial genomic islands by only considering contigs with  $\geq 98\%$  nucleotide  
139 identity to *purF* and *radC*, the conserved genes that flanked the genomic islands. This search  
140 yielded 258 contigs. Aligning these sequences revealed that each contig encoded a short,  
141 hypervariable region of small ORFs which was flanked by conserved genomic sequences (Figure  
142 2B). In total, we observed 128 unique examples of these hypervariable loci, which displayed  
143 considerable gene turnover, resulting in 54 distinct gene arrangements among the 128 unique  
144 loci. Despite not including them in our search strategy, *acrIIA22* homologs were universally  
145 conserved in all 128 unique genomic islands whereas no other gene was present in more than  
146 two-thirds of the 54 distinct gene arrangements (Figure 2C). Based on this finding, we infer that  
147 the arrival of *acrIIA22* preceded the diversification seen at this locus and that its homologs have  
148 been retained since, despite the considerable gene turnover that has occurred subsequently.

149 Though most ORFs in these islands were of unknown function, many had close homologs in  
150 the genomes of nine representative *acrIIA22*-encoding phage (dashed boxes in Figure 2A, phage  
151 icons in Figure 2C). This suggests that phages continue to supply the genetic diversity seen at  
152 these hypervariable genomic loci. These rapid gene gains and losses probably occur as they do  
153 in other genomic islands, via recombination between this locus and related MGEs that infect the  
154 same host bacterium without the MGE necessarily integrating into the locus<sup>19</sup>. Taken together,  
155 our data suggest that an incomplete prophage excision event left *acrIIA22* behind in a bacterial  
156 genomic locus, which then diversified via gene exchange with additional phage genomes (Figure  
157 2D).

158 In prophage genomes, *acrIIA22* homologs were found in hypervariable regions, near the  
159 junction with the host bacterial genome (Figure 2A). Both features imply these loci are subject to  
160 higher than average rates of recombination. Despite this, we could find no gene consistently  
161 present within or outside of these genomic islands that could account for their hypervariable  
162 nature (e.g. an integrase, transposase, recombinase, or similar function that is typically  
163 associated with genomic islands<sup>20</sup>). Instead, *acrIIA22* was the only gene conserved at this locus.  
164 If it could somehow promote recombination, either alone or with other factors, this could account  
165 for the high rates of gene exchange observed adjacent to *acrIIA22* in phage and bacterial  
166 genomes (Figures 2A, 2B).

167 In total, we identified 30 unique *acrIIA22* homologs, 25 of which were predicted to originate  
168 from the unnamed *Clostridial* genus, CAG-217 (Figure 3A). Because *acrs* are only beneficial to  
169 phages if they inhibit CRISPR-Cas activity, they are typically found only in taxa with a high  
170 prevalence of susceptible Cas proteins<sup>9</sup>. If *AcrIIA22* functions naturally as an *Acr*, we would  
171 predict that Cas9-encoding, type II-A CRISPR-Cas systems like SpyCas9 would be common in  
172 CAG-217 bacteria. To test this idea, we examined 779 draft assemblies of CAG-217 genomes  
173 and found that 179 of the 181 predicted CRISPR-Cas systems in CAG-217 genomes were Cas9-  
174 encoding, type II-A systems. This enrichment for Cas9 is particularly striking for a *Clostridial*  
175 genus, as *Clostridia* rarely encode Cas9. Instead, they typically encode other CRISPR-Cas  
176 defenses<sup>21</sup>. Thus, the distribution of CRISPR-Cas systems in CAG-217 genomes supports our  
177 hypothesis that *acrIIA22* functions natively as an *acr*.

178 We also found evidence that Cas9 is active in CAG-217 bacteria. Prophages from CAG-217  
179 encode 78 type II-A Acrs (homologs of AcrIIA7, AcrIIA17, and AcrIIA21), suggesting they are  
180 actively engaged in an arms race with Cas9-based defenses in these bacteria. We even found  
181 one example where homologs of *acrIIA17* and *acrIIA22* were located within one kilobase of each  
182 other in a prophage genome (Supplemental Figure 4)<sup>22</sup>. Since phages often aggregate *acrs* in the  
183 same genomic locus<sup>23</sup>, this observation independently supports our hypothesis that CAG-217  
184 prophages encode *acrIIA22* homologs to inhibit type II-A CRISPR-Cas systems.

185 We next tested whether the ability to inhibit type II-A CRISPR-Cas systems was a shared  
186 property of *acrIIA22* homologs from CAG-217 bacteria. To do so, we selected *acrIIA22* homologs  
187 that spanned the phylogenetic diversity present among CAG-217 genomes (Figure 3A) and tested  
188 their ability to protect a target plasmid from SpyCas9 elimination. These analyses revealed that  
189 each *acrIIA22* homolog from CAG-217 could antagonize SpyCas9 activity at least partially (Figure  
190 3B). This conservation of anti-SpyCas9 activity among divergent AcrIIA22 homologs (for example,  
191 sharing only 56.9% identity), suggests that they may broadly inhibit Cas9. Broad inhibition has  
192 been seen for some other type II-A Acrs<sup>12</sup> and can occur either by targeting a conserved feature  
193 of Cas9 or by inhibiting Cas9 via an indirect mechanism that it cannot easily evade.

#### 194 **AcrIIA22 functions via a non-canonical mechanism**

195 Almost all characterized Acrs inhibit their cognate Cas proteins via direct binding without the  
196 involvement of additional co-factors; as a result, they exhibit strong inhibitory activity when tested  
197 *in vitro* (Supplemental Table 1). To determine if this was the case for AcrIIA22, we purified it from  
198 *E. coli* and asked whether it could bind and inhibit SpyCas9. To test for binding, we asked whether  
199 a tagged AcrIIA22 co-precipitated with SpyCas9 when mixed as purified proteins. Unlike AcrIIA4,  
200 which binds strongly to SpyCas9 and inhibits its activity *in vitro*, we could detect little to no binding  
201 between AcrIIA22 and SpyCas9, regardless of whether a single-guide RNA (sgRNA) was  
202 included or not (Supplemental Figure 5). We also observed that AcrIIA22 had no impact on  
203 SpyCas9's ability to cleave linear, double-stranded DNA (dsDNA), even when AcrIIA22 was  
204 included at substantial molar excess over SpyCas9 (Supplemental Figure 6). These results  
205 suggest that, at least in isolation, AcrIIA22 cannot bind and inhibit SpyCas9. Thus, AcrIIA22 lacks  
206 the predominant biochemical activities exhibited by previous Acrs that have been mechanistically  
207 characterized.

208 We therefore considered the possibility that AcrIIA22 encodes an unconventional anti-  
209 CRISPR that acts via a non-canonical mechanism. However, AcrIIA22 homologs had no  
210 sequence homology to other characterized proteins, which would have provided clues about  
211 AcrIIA22 activity and biochemical mechanisms. Anticipating that structural homology might  
212 provide some insight, we solved AcrIIA22's structure using X-ray crystallography. We first built a  
213 homology model from AcrIIA22's primary sequence with Robetta. We then used this model for  
214 molecular replacement to solve its structure at 2.80Å resolution (PDB:7JTA). The asymmetric unit  
215 in AcrIIA22's crystal comprises two monomers stacked end-to-end, with each monomer folding  
216 into a four-stranded  $\beta$ -sheet (Figure 4A, Table 1). A DALI structure-structure search revealed that  
217 the AcrIIA22 monomer is similar to members of the newly recognized PC4-like structural fold  
218 (Figure 4B, Supplemental Table 2). PC4-like proteins have independently evolved in all domains  
219 of life, typically adopt a  $\beta$ - $\beta$ - $\beta$ - $\beta$ - $\alpha$  topology, and often homodimerize to bind diverse RNA and  
220 DNA species using variably positioned  $\beta$ -sheets<sup>24</sup>.



221 Despite crystallizing as a homodimer, AcrIIA22 migrated at a size substantially larger than its  
222 molecular weight by size exclusion chromatography (SEC) (Figure 4C). This suggested that  
223 AcrIIA22 may oligomerize *in vivo*. Structural evidence supported the same conclusion, as  
224 AcrIIA22 was predicted to form a stable tetramer when analyzed with PISA, a tool for inferring  
225 macromolecular assemblies from crystalline structure<sup>25</sup> (Figures 4D, 4E). This putative tetramer  
226 has a molecular mass consistent with that observed by SEC and comprises pairs of outward-  
227 facing, concave  $\beta$ -sheets, as is seen in other PC4-like proteins<sup>24</sup>. Interestingly, many PC4-like  
228 proteins bind nucleic acids using similar concave  $\beta$ -sheets and, in some instances, form higher-  
229 order oligomers as a necessary step for binding DNA or RNA<sup>24</sup>. Consistent with this possibility,  
230 adjacent  $\beta$ -sheets along each outward face of the putative AcrIIA22 tetramer form a groove that  
231 could potentially accommodate a nucleic acid substrate (Figure 4E). Thus, even though AcrIIA22  
232 lacks the alpha-helix typically seen in PC4-like proteins, its other structural and functional  
233 attributes led us to suspect that AcrIIA22 also interacted with nucleic acids.

234 Our tetramer model predicts that a four amino acid interface at the C-terminus of AcrIIA22 is  
235 required for adjacent  $\beta$ -sheets to bind one another and form a grooved, oligomeric structure  
236 (Figures 4D, 4F). We predicted that a two-residue, C-terminal truncation of AcrIIA22 would disrupt  
237 this interface (Figure 4F). To test this prediction, we examined the oligomeric state of this 2-aa  
238 AcrIIA22 deletion mutant. Consistent with our hypothesis, we found that these AcrIIA22  
239 complexes migrated at about half the size of their wild-type counterparts by SEC (Figure 4C),  
240 suggesting that this C-terminal interface is required to progress from a two to four-membered  
241 oligomer. Moreover, we found that the 2-aa deletion mutant was also impaired for SpyCas9  
242 antagonism in our plasmid protection assay (Figure 4G). Thus, this C-terminal motif is necessary  
243 for protection from SpyCas9 and higher-order oligomerization, suggesting that oligomerization  
244 may be necessary for AcrIIA22's anti-SpyCas9 activity.

## 245 **AcrIIA22 is a DNA nickase that relieves torsion of supercoiled plasmids**

246 Our structural analyses indicated that AcrIIA22 is a PC4-like nucleic acid-interacting protein.  
247 Like AcrIIA22, many PC4-like proteins are encoded in phage genomes. Among these is  
248 AcrIIA22's closest structural relative in the PC4 family: a predicted single-stranded binding (SSB)  
249 protein from phage T5 (Figure 4B)<sup>26</sup>. This putative SSB protein has been predicted to directly  
250 stimulate recombination during the recombination-dependent replication of phage T5's genome<sup>27</sup>.  
251 This prediction, together with our inference from genomic analyses (Figure 2), led us to  
252 hypothesize that AcrIIA22 may have similar recombination-stimulating activity. Indeed, other PC4-  
253 like proteins have been observed experimentally to unwind duplex DNA, a function consistent  
254 with their proposed roles in transcription and recombination<sup>24,28</sup>. Therefore, we investigated  
255 whether AcrIIA22 might interact with duplexed DNA in a manner consistent with its putative  
256 recombinogenic properties.

257 We first asked whether we could detect any biochemical effect of *acrIIA22* on a double-  
258 stranded DNA (dsDNA) target plasmid *in vivo*. In this experiment, we considered three *acrIIA22*  
259 genotypes: the wild-type sequence, a null mutant with a single base pair change to create an  
260 early stop codon, and the 2-aa truncation mutant that we previously showed was defective for  
261 oligomerization (Figure 4C) and SpyCas9 antagonism (Figure 4G). We then grew overnight  
262 cultures of plasmids expressing each genotype, purified plasmid DNA, and analyzed its topology  
263 using gel electrophoresis (Figure 5A). As is typical for plasmid purifications from *E. coli*, the  
264 plasmid encoding the null mutant was predominantly recovered in a supercoiled form. In contrast,  
265 AcrIIA22 expression shifted much of the target plasmid to a slowly migrating form, consistent with

266 an open-circle conformation. These findings suggest that AcrIIA22 expression could relieve  
267 plasmid supercoiling, hinting at a potential DNA nickase activity. We also found that the 2-aa  
268 truncation mutant was impaired for this putative nickase activity, consistent with this mutant's  
269 compromised oligomerization and anti-Cas9 activities (Figure 4G).

270 Because *acrIIA22* expression altered plasmid topology *in vivo*, we next asked whether purified  
271 AcrIIA22 had an impact on a plasmid DNA substrate *in vitro*. By gel electrophoresis, we observed  
272 that AcrIIA22 shifted a supercoiled plasmid to a slowly migrating form in a time and concentration-  
273 dependent manner (Figures 5B, 5C, Supplemental Figure 7). For comparison, we also treated a  
274 plasmid with the nickase Nb.BssSI, yielding a band that migrated at the same position as the  
275 putatively open-circle product generated via AcrIIA22 activity (Figure 5B). Extended incubation  
276 times and high concentrations of AcrIIA22 resulted in conversion of plasmids to a linearized DNA  
277 product, consistent with a nickase-like nuclease activity acting on both strands of DNA (Figure  
278 5B, Supplemental Figure 7). AcrIIA22's nickase activity was strongly stimulated in the presence  
279 of Mn<sup>2+</sup>, Co<sup>2+</sup>, and Mg<sup>2+</sup>, weakly with Ni<sup>2+</sup> and Zn<sup>2+</sup>, but not at all with Ca<sup>2+</sup> (Supplemental Figure  
280 8). Consistent with our *in vivo* observations, we found that the 2-aa deletion mutant was impaired  
281 for nickase activity, relative to wildtype AcrIIA22 (Figure 5D).

282 Our *in vitro* and *in vivo* findings suggest that AcrIIA22 is responsible for the change in plasmid  
283 topology observed in bacterial cells. To confirm that the observed gel-shift was the result of  
284 AcrIIA22 nickase activity and not protein-bound DNA, we purified an AcrIIA22-treated plasmid  
285 with phenol-chloroform and re-examined it by gel electrophoresis. We observed that the nicked  
286 form of the plasmid persisted through purification, establishing AcrIIA22 as a *bona-fide* nickase  
287 (supp figure 8). Therefore, based on both *in vitro* and *in vivo* findings, we conclude that that  
288 *acrIIA22* encodes a nickase protein that relieves the torsional stress of supercoiled plasmids.

### 289 **AcrIIA22's nickase activity impairs SpyCas9**

290 Having established that AcrIIA22 is a DNA nickase, we next investigated whether this  
291 biochemical activity correlated with its ability to inhibit SpyCas9. If this were the case, it would  
292 explain how AcrIIA22 protected plasmids from SpyCas9 without directly binding the Cas protein.  
293 We therefore tested the consequences of expressing AcrIIA22 on a target plasmid in the presence  
294 of SpyCas9. As before, we began by comparing overnight plasmid purifications of a target plasmid  
295 expressing AcrIIA22, a null mutant with an early stop codon, or the 2-aa AcrIIA22 truncation  
296 mutant. However, this time, we also subjected the plasmid to SpyCas9 targeting during bacterial  
297 growth. We were unable to recover the negative control target plasmid after overnight growth,  
298 implying that this target plasmid was eliminated by SpyCas9 (Figure 6A). The 2-aa truncation  
299 mutant was also eliminated by SpyCas9, indicating these residues are important for function. In  
300 contrast, SpyCas9 did not eliminate a target plasmid that expressed full-length AcrIIA22 (Figure  
301 6A), consistent with AcrIIA22's previously established capacity to protect against SpyCas9 (Figure  
302 1C).

303 To be effective, a CRISPR-Cas system must eliminate its target at a faster rate than the target  
304 can replicate<sup>29</sup>. Our findings raised the possibility that AcrIIA22 modifies a target plasmid into a  
305 SpyCas9-resistant conformation to win this 'kinetic race' against SpyCas9, potentially shifting the  
306 equilibrium to favor plasmid persistence instead of elimination. To test this kinetic race model, we  
307 asked whether a plasmid that had been pre-treated with AcrIIA22 could resist digestion by  
308 SpyCas9 *in vitro*. Therefore, we purified the open-circle plasmid that resulted from AcrIIA22 pre-  
309 treatment and determined how efficiently it was cleaved by SpyCas9 compared to an unmodified,

310 supercoiled plasmid (Figure 6B). SpyCas9 showed a clear preference for cleaving the supercoiled  
311 substrate versus the AcrIIA22-treated open-circle plasmid (Figure 6C, Supplemental Figure 9).  
312 An open-circle plasmid pre-treated with the nickase Nb.Bss.SI was similarly recalcitrant to  
313 SpyCas9 digestion. Taken together, our findings suggest that relieving DNA torsion provides the  
314 mechanistic explanation for AcrIIA22's ability to inhibit SpyCas9 *in vivo*.

315 Our findings also help explain why AcrIIA22 is more adept at protecting plasmids than phages  
316 from SpyCas9 in our system. Because plasmids are maintained as circular, extrachromosomal  
317 elements, they are more likely to undergo torsional change when nicked than phages or  
318 transposons, which are often linear or spend significant time integrated into their host's genome.  
319 Additionally, linear DNA experiences minimal torsional stress and is therefore less susceptible  
320 than supercoiled plasmids to cleavage by SpyCas9<sup>15</sup>. This likely explains why AcrIIA22 failed to  
321 protect a linear dsDNA substrate from SpyCas9 *in vitro* (Supplemental Figure 6), as there is very  
322 little torsional stress for it to relieve in this substrate. Importantly, *in vitro* experiments indicate that  
323 Cas9 requires a higher degree of negative supercoiling to provide the free energy needed for R-  
324 loop formation than type I CRISPR-Cas systems<sup>13</sup>. *In vivo* observations also show that DNA  
325 supercoiling affects the recruitment of SpyCas9 to its target site in bacteria<sup>14</sup>. This suggests that  
326 Cas9 may be particularly susceptible to changes in DNA torsion. Thus, factors like the AcrIIA22  
327 nickase, which modify DNA torsion, may provide a general means to protect against Cas9.

## 328 Discussion

329 In this study, we identify and characterize *acrIIA22*, a previously undescribed gene that can  
330 antagonize SpyCas9. We show that AcrIIA22 homologs have proliferated in genomes of CAG-  
331 217 bacteria, which have a high prevalence of Cas9 homologs. Using a combination of structural  
332 and biochemical studies, we show that AcrIIA22 acts by nicking supercoiled DNA to relieve  
333 torsional stress on a target plasmid, thereby impairing SpyCas9 activity *in vivo* and *in vitro*. Taken  
334 together, our data suggest that DNA topology represents a new battleground in the evolutionary  
335 arms race between CRISPR-Cas systems and MGEs. Because Cas9 is more susceptible to  
336 evasion via changes to DNA topology than other CRISPR-Cas systems<sup>13</sup>, it may be more  
337 disadvantaged than other bacterial defense systems in this arms race. Additionally, DNA topology  
338 is dynamically regulated in phages, plasmids and other MGEs. This means that topology-  
339 modifying factors already exist in diverse MGEs that could have secondary effects on CRISPR-  
340 Cas activity and thus prove useful in the context of a molecular arms race<sup>30,31</sup>. For instance,  
341 though not studied in the context of bacterial defense systems, the fitness of phage T4 is improved  
342 via the expression of an accessory protein that modifies DNA supercoiling and the propensity of  
343 R-loops to form<sup>32</sup>. Other phages, such as those in the T5-like family, incorporate regular nicks into  
344 their genome, the function of which has eluded description for over 40 years<sup>33</sup>. Based on our  
345 findings, we hypothesize that phages and MGEs targeted by Cas9 exploit factors that modify DNA  
346 topology as a tactic to evade host immunity.

347 Functional selections like ours are biased towards identifying genes that work well in a  
348 heterologous context. For example, even though AcrIIA22 is encoded on the genome of a  
349 genetically intractable bacterium, we could identify it using a functional metagenomic selection for  
350 SpyCas9 antagonism in *E. coli*. Although we have characterized its activities in *E. coli* and *in vitro*,  
351 it remains formally possible that AcrIIA22 functions differently in its native context. For instance,  
352 we cannot rule out the possibility that AcrIIA22 might interact with a Cas9 protein from a CAG-  
353 217 bacterium. Alternatively, AcrIIA22's anti-Cas9 activity might be related to a native  
354 recombinogenic function (Figure 2). As precedent for this idea, CRISPR-Cas evasion was recently



355 demonstrated for homologs of the recombination proteins Red $\beta$  and  $\lambda$ Exo in *Vibrio cholerae*<sup>34</sup>.  
356 Nevertheless, the heterologous behavior of AcrIIA22 in *E. coli* is clearly sufficient for SpyCas9  
357 antagonism *in vivo* and its nickase activity can protect plasmids from SpyCas9 *in vitro*.  
358 Furthermore, an AcrIIA22 mutant that is partially defective for nickase activity *in vitro* (Figure 5D)  
359 is ~1,000-fold less effective at protecting a plasmid from SpyCas9 *in vivo* (Figure 4G). This  
360 indicates that modest changes in nickase activity can have major consequences for plasmid  
361 survival, which is consistent with our kinetic race model (Figure 6B) and previous observations  
362 that non-linear equilibrium dynamics determine whether an MGE withstands CRISPR-Cas  
363 immunity<sup>29</sup>.

364 Our results suggest that proteins that affect DNA torsion may also enable Cas9 antagonism.  
365 For example, in addition to AcrIIA22, the Nb.BssSI nickase was also capable of protecting a  
366 plasmid from SpyCas9 *in vitro*. Yet, despite the regular occurrence of nickases in nature,  
367 functional selections for anti-Cas9 activity have not previously recovered these enzymes<sup>12,35</sup>. We  
368 speculate that AcrIIA22 treads a fine balance between activity and toxicity; its nickase activity is  
369 high enough to antagonize SpyCas9 in a kinetic race, but not so high that it would be toxic to the  
370 host cell (Supplemental Figure 1). Its oligomerization may represent an important mechanism to  
371 control nickase activity and suppress host toxicity. Studies of other phage- and bacterial-encoded  
372 nickase proteins may provide additional insight into whether AcrIIA22 proteins have additional  
373 properties that render them to be especially well-suited to antagonize SpyCas9.

374 Is AcrIIA22 a true anti-CRISPR? AcrIIA22 lacks features that are typical of conventional Acrs,  
375 such as the ability to bind Cas proteins or to inhibit CRISPR-Cas activity as a purified protein.  
376 However, other Acr proteins also lack these features. For example, the well-characterized  
377 SpyCas9 antagonist AcrIIA1 does not inhibit purified SpyCas9, but instead stimulates Cas9  
378 degradation<sup>36</sup>. Similarly, AcrIIA7 does not appear to bind SpyCas9 but can nevertheless inhibit it  
379 *in vitro* via an unknown mechanism<sup>35</sup>. Indeed, anti-CRISPR proteins are defined by a common  
380 strategy and outcome rather than by a common biochemical mechanism. Our finding that  
381 *AcrIIA22* is encoded by prophages as a single gene that strongly protects plasmids and weakly  
382 protects phages from SpyCas9 (Figure 3B, Supplemental Figure 4) makes it much more similar  
383 to other Acrs<sup>23</sup> and distinct from non-canonical CRISPR-Cas evasion strategies like DNA  
384 glucosylation<sup>6</sup> or homologous recombination<sup>34</sup>.

385 AcrIIA22 does not appear to provide the same potency of Cas9 inhibition as some other  
386 characterized Acrs, particularly in protecting phage Mu. However, potent inhibition is not a pre-  
387 requisite for effective anti-CRISPR activity. Indeed, selection can favor weak anti-CRISPRs over  
388 strong ones in mixed phage populations<sup>37</sup>. Even in cases where mechanisms for Cas9 evasion  
389 are weak (Supplemental Figure 3), they may nonetheless confer substantial benefit. For example,  
390 slowing down Cas9 cleavage could increase the time and probability for escape mutants to arise  
391 (e.g. Cas9 target-site variants<sup>1</sup>, deletion mutants<sup>34</sup>), allow for additional Acr expression<sup>38,39</sup>, or  
392 permit further genome replication to overwhelm CRISPR-Cas immunity<sup>29</sup>. This phenomenon –  
393 weak tolerance giving rise to long-term resistance – is reproducibly observed in cases of strong  
394 selective pressure. For instance, in the context of antibiotic resistance, the expression of QNR  
395 pentapeptide proteins in many human pathogens can provide low-level drug tolerance, extend  
396 survival, and allow time for additional mutations to develop that completely resist quinolone  
397 antibiotics<sup>40</sup>.

398 As the use of functional metagenomics to study phage-bacterial conflicts grows more  
399 common, many novel genes and mechanisms for CRISPR-Cas inhibition are likely to be

400 described<sup>12,35</sup>. Like AcrIIA22, which has no homology to any previously described anti-CRISPR  
401 and lacks other genetic signatures used for *acr* discovery (e.g., linkage with helix-turn-helix  
402 transcription factors)<sup>41,42</sup>, these new genes may not exhibit canonical Acr behaviors. It is inevitable  
403 that these discoveries will lead a more nuanced understanding of the arms race between  
404 CRISPR-Cas systems and MGEs. While they might blur the precise boundaries on what defines  
405 an anti-CRISPR, these findings will also reveal undiscovered strategies for molecular antagonism  
406 and new battlegrounds in the age-old conflict between bacteria and their phages.

407

## 408 **Methods**

### 409 **Plasmid protection assay**

410 All assays were done in *Escherichia coli* (strain: NEB Turbo). As described previously<sup>12</sup>,  
411 SpyCas9 was expressed from a CloDF13-based plasmid marked with a spectinomycin resistance  
412 cassette. The SpyCas9 construct programmed to eliminate a kanamycin-marked target plasmid  
413 was called pSpyCas9\_crA (Supplemental Table 4). It eliminated a target vector that inducibly  
414 expressed a gene-of-interest via depression of the TetR transcription factor with doxycycline  
415 (named generically pZE21\_tetR; Supplemental Table 4). IPTG was used in samples with the  
416 target vector to ensure high levels of TetR expression (which was driven by the lac promoter) and  
417 thus inducible control of our gene of interest. Cultures of each sample were grown overnight at  
418 37C with shaking at 220 rpm in lysogeny broth (LB; 10 g/L casein peptone, 10 g/L NaCl, 5 g/L  
419 ultra-filtered yeast powder) containing spectinomycin 50 µg/ml, kanamycin 50 µg/ml, and 0.5mM  
420 IPTG. These growth conditions kept both SpyCas9 and the gene of interest in uninduced states.  
421 The next morning, overnight cultures were diluted 1:50 into LB broth containing spectinomycin 50  
422 µg/ml, kanamycin 50 µg/ml, 0.5mM IPTG, and doxycycline 100 ng/ml to induce the gene of  
423 interest. Cultures were grown at 37C on a roller drum to mid-log phase (for approximately 1.5  
424 hours to OD600 of 0.3-0.6). Once cells reached mid-log phase, they were diluted to OD600 value  
425 of 0.01 into two media types: (a) LB containing spectinomycin 50 µg/ml, 0.5mM IPTG, and  
426 doxycycline 100 ng/ml, and (b) LB containing spectinomycin 50 µg/ml, 0.5mM IPTG, doxycycline  
427 100 ng/ml, and 0.2% (L) arabinose. These media induced either the gene of interest alone, or  
428 both the gene of interest and SpyCas9, respectively. Each sample was grown in triplicate in a 96  
429 well plate in a BioTek Cytation 3 plate reader. After 6 hours of growth at 37°C with shaking at 220  
430 rpm, each sample was diluted ten-fold and plated on two types of media: (a) LB spectinomycin  
431 50 µg/ml + 0.5mM IPTG or (b) LB spectinomycin 50 µg/ml, kanamycin 50 µg/ml, 0.5mM IPTG.  
432 Plates were incubated at 37C overnight. Then, colonies were counted to determine the fraction  
433 of colony forming units (cfus) that maintained kanamycin resistance (and thus the target vector).  
434 All figures depicting these data show the log-transformed proportion of Kan<sup>R</sup>/total cfu, both with  
435 and without SpyCas9 induction. The growth curves in Supplemental Figure 1 match the  
436 experiment depicted Figure 1C for the uninduced SpyCas9 samples. For the uninduced *orf\_1*  
437 sample, doxycycline was omitted from media throughout the experiment. Growth rates quoted in  
438 text were calculated using the slope of the OD600 growth curves during log phase, following a  
439 natural log transformation.

### 440 **Impact of AcrIIA22 on GFP expression**

441 We swapped *spyCas9* for *egfp* in our CloDF13-based plasmid and co-expressed AcrIIA22  
442 to determine if AcrIIA22 impacted expression from this construct. We reasoned that if AcrIIA22  
443 influenced CloDF13's copy number or the transcription of *spyCas9* it would also impact GFP  
444 levels in this construct (pCloDF13\_GFP; Supplemental Table 4). To perform this experiment, we  
445 co-transformed pCloDF13\_GFP and pZE21\_tetR encoding *acrIIA22* into *E. coli* Turbo. Single  
446 colonies were picked into 4mL of LB containing spectinomycin 50 µg/ml ('spec50') and kanamycin  
447 50 µg/ml ('kan50') and 0.5mM IPTG and grown overnight at 37°C shaking at 220rpm. The next  
448 morning the overnight culture was diluted 1:50 into both LB spec50 Kan50 + 0.5mM IPTG with  
449 and without doxycycline (to induce *acrIIA22*) and grown at 37°C for about 1.5 hours to mid-log  
450 phase (OD600 0.2-0.6). The OD600 was measured, and all samples were diluted to OD600 of  
451 0.01 in two media types: (a) LB spec50 + kan50 + 0.5mM IPTG + 0.2% arabinose (inducing *gfp*  
452 only) or (b) LB spec50 + kan50 + 0.5mM IPTG + 0.2% arabinose + 100ng/ml doxycycline (inducing

453 *gfp* and *acrIIA22*). A volume of 200  $\mu$ l of each sample was then transferred to a 96-well plate in  
454 triplicate and we measured GFP fluorescence every 15 minutes for 24 hours (GFP was excited  
455 using 485 nm light and emission detected via absorbance at 528 nm). In parallel, we included  
456 control samples that lacked the kanamycin-marked plasmid and varied whether doxycycline was  
457 added or not (at 100 ng/ml). In these control samples, we noticed that doxycycline slightly  
458 diminished GFP expression (sub-toxic levels of the antibiotic may still depress translation). Thus,  
459 we normalized GFP fluoresced measurements in our experiment with *AcrIIA22* to account for this  
460 effect in all +doxycycline samples. These fluorescence measurements are depicted in  
461 Supplemental Figure 2B.

## 462 **Western blots to *AcrIIA22*'s impact on SpyCas9 expression**

463 Overnight cultures of *E. coli* Turbo that expressed pSpyCa9\_crNT and pZE21\_tetR  
464 encoding a gene of interest (Supplemental Tables 4, 5) were grown in LB spec50 + kan50 +  
465 0.5mM IPTG. The next morning, these cultures were diluted 1:100 in 4ml of either (a) LB spec50  
466 + kan50 + 0.5mM IPTG or (b) LB spec50 + kan50 + 0.5mM IPTG + 100 ng/ml doxycycline (to  
467 induce the gene of interest). We included samples that expressed either *acrIIA22* or *gfp* as a gene  
468 of interest. In all SpyCas9 constructs, we used a crRNA that did not target our plasmid backbone  
469 (pSpyCa9\_crNT) to ensure that *acrIIA22* expression remained high and its potential impact on  
470 SpyCas9 expression levels would be most evident. All samples were grown for two hours at 37°C  
471 to reach mid-log phase (OD600 0.3 to 0.5) and transferred into media that contained 0.2%  
472 arabinose to induce SpyCas9. At transfer, volumes were normalized by OD600 value to ensure  
473 an equal number of cells were used (diluted to a final OD600 of 0.05 in the arabinose-containing  
474 medium). This second medium did or did not contain 100 ng/ml doxycycline to control expression  
475 of *acrIIA22* or *gfp*, as with the initial media. Throughout this experiment, we included a control  
476 strain that lacked pZE21\_tetR and thus only expressed SpyCas9. Kanamycin and doxycycline  
477 were omitted from its growth media. For this control strain, we also toggled the addition of  
478 arabinose in the second growth medium to ensure positive and negative controls for SpyCas9  
479 were included in our experiment. After three hours and six hours of SpyCas9 induction, OD600  
480 readings were again taken and these values used to harvest an equal number of cells per sample  
481 (at three hours, OD600 values were between 0.76 and 0.93 and 0.75ml to 0.9ml volumes  
482 harvested; at six hours 0.4ml was uniformly harvested as all absorbance readings were  
483 approximately 1.6).

484 All samples were centrifuged at 4100g to pellet cells, resuspended in 100  $\mu$ l of denaturing  
485 lysis buffer (12.5 mM Tris-HCl, pH 6.8; 4% SDS), and passed through a 25 gauge needle several  
486 times to disrupt the lysate. Samples were then boiled at 100°C for 10 minutes, spun at 13,000  
487 rpm at 4°C for 15 minutes and the supernatants removed and frozen at -20°C. The next day, 12  
488  $\mu$ l of lysate was mixed with 4  $\mu$ l of 4x sample buffer (200 mM Tris-HCl, 8% SDS, 40% glycerol,  
489 200 mM DTT, and 0.05% bromophenol blue) and boiled at 100°C for 10 minutes. Then, 10  $\mu$ l  
490 sample was loaded onto a BioRad Mini-Protean “any KD Stain Free TGX” gel (cat. #4569035)  
491 and run at 150V for 62 minutes. To verify that equivalent amounts of each sample were run, gels  
492 were visualized on a BioRad chemidoc for total protein content. Protein was then transferred to a  
493 0.2  $\mu$ M nitrocellulose membrane using the Bio-Rad Trans-Blot Turbo system (25 V, 1.3 A for 10  
494 min). We then washed membranes in PBS/0.1% Triton-X before incubating them with a mixture  
495 of the following two primary antibodies, diluted in in Licor Odyssey Blocking Solution (cat. #927–  
496 40000): (i) monoclonal anti-SpyCas9, Diagenode cat. #C15200229-50, diluted 1:5,000; (ii)  
497 polyclonal anti-GAPDH, GeneTex cat. # GTX100118, diluted 1:5,000. The GAPDH antibody

498 served as a second check to ensure equal protein levels were run. Membranes were left shaking  
499 overnight at 4°C, protected from light. Then, membranes were washed four times in PBS/0.1%  
500 Triton-X (ten-minute washes) before they were incubated for 30 minutes at room temperature with  
501 a mixture of secondary antibodies conjugated to infrared dyes. Both antibodies were diluted  
502 1:15,000 in LiCor Odyssey Blocking Solution. To detect SpyCas9, the following secondary  
503 antibody was used: IR800 donkey, anti-mouse IgG, Licor cat# 926–32212. To detect GAPDH,  
504 IR680 goat, anti-rabbit IgG, Licor cat# 926-68071 was used. Blots were imaged on a Licor  
505 Odyssey CLx after three additional washes.

## 506 **Phage plaquing assay**

507 Overnight cultures of *E. coli* Turbo that expressed pSpyCa9\_crMu and pZE21\_tetR  
508 encoding a gene of interest (Supplemental Tables 4, 5) were grown at 37°C in LB spec50 + kan50  
509 + 0.5 mM IPTG. Genes of interest were either *acrIIA4*, *gfp*, or *acrIIA22*. The pSpyCas9 construct  
510 targeted phage Mu and was previously demonstrated to confer strong anti-phage immunity in this  
511 system<sup>12</sup>. A control strain expressing pZE21-tetR-*gfp* and SpyCas9\_crNT (which encoded a  
512 CRISPR RNA that does not target phage Mu) was grown similarly. The next morning, all cultures  
513 were diluted 50-fold into LB spec50 + kan50 + 0.5 mM IPTG + 5 mM MgCl<sub>2</sub> and grown at 37°C  
514 for three hours. Then, doxycycline was added to a final concentration of 100 ng/ml to induce the  
515 gene of interest. Two hours later, SpyCas9 was induced by adding a final concentration of 0.2%  
516 w/v arabinose. Two hours after that, cultures were used in soft-agar overlays on one of two media  
517 types, discordant for arabinose, to either maintain SpyCas9 expression or let it fade as arabinose  
518 was diluted in top agar and consumed by the host bacteria (per Supplemental Figure S2). Top  
519 and bottom agar media were made with LB spec50 + kan50 + 0.5 mM IPTG + 5 mM MgCl<sub>2</sub>. In  
520 cases where SpyCas9 expression was maintained, arabinose was also added at a final  
521 concentration of 0.02% to both agar types. Top agar was made using 0.5% Difco agar and bottom  
522 agar used a 1% agar concentration. For the plaquing assay, 100 µl of bacterial culture was mixed  
523 with 3 ml of top agar, allowed to solidify, and ten-fold serial dilutions of phage Mu spotted on top  
524 using 2.5 µl droplets. After the droplets dried, plates were overturned and incubated at 37°C  
525 overnight before plaques were imaged the subsequent day.

## 526 **Identification of AcrIIA22 homologs and hypervariable genomic islands**

527 We searched for AcrIIA22 homologs in three databases: NCBI nr, IMG/VR, and a set of  
528 assembled contigs from 9,428 diverse human microbiome samples<sup>18</sup>. Accession numbers for the  
529 NCBI homologs are indicated on the phylogenetic tree in Figure 3A. They were retrieved via five  
530 rounds of an iterative PSI-BLAST search against NCBI nr performed on October 2<sup>nd</sup>, 2017. In  
531 each round of searching, at least 90% of the query protein (the original AcrIIA22 hit) was covered,  
532 88% of the subject protein was covered, and the minimum amino acid identity of an alignment  
533 was 23% (minimum 47% positive residues; e-value ≤ 0.001). Only one unique AcrIIA22 homolog  
534 was identified in IMG/VR (from several different phage genomes) via a blastp search against the  
535 July, 2018 IMG/VR proteins database (using default parameters). It is identical to the sequence  
536 of AcrIIA22b (Figure 3A).

537 Most unique AcrIIA22 homologs were identified in the assembly data of over 9,400 human  
538 microbiomes performed by Pasolli and colleagues<sup>18</sup>. These data are grouped into multiple  
539 datasets: (i) the raw assembly data, and (ii) a set of unique species genome bins (SGBs), which  
540 was generated by first assigning species-level phylogenetic labels to each assembly and then  
541 selecting one representative genome assembly per species. We identified AcrIIA22 homologs



542 using several queries against both databases. First, we performed a tblastn search against the  
543 SGB database using the *AcrIIA22* sequence as a query, retrieving 141 hits from 137 contigs. A  
544 manual inspection of the genome neighborhoods for these hits revealed that most homologs  
545 originated from a short, hypervariable genomic island but that some homologs were encoded by  
546 prophages. No phage-finding software was used to identify prophages; they were apparent from  
547 a manual inspection of the gene annotations that neighbored *acrIIA22* homologs (see the section  
548 entitled “Annotation and phylogenetic assignment of metagenomic assemblies” for details).

549 To find additional examples of *AcrIIA22* homologs and of these genomic islands, we then  
550 queried the full raw assembly dataset. To do so without biasing for *acrIIA22*-encoding sequences,  
551 we used the *purF* gene that flanked *acrIIA22*-encoding genomic islands as our initial query  
552 sequence (specifically, we used the *purF* gene from contig number 1 in Supplemental Table 3; its  
553 sequence is also in Supplemental Table 5). To consider only the recent evolutionary history of  
554 this locus, we required all hits have  $\geq 98\%$  nucleotide identity and required all hits to be larger than  
555 15 kilobases in length to ensure sufficient syntenic information. From these contigs, we further  
556 filtered for those that had  $\geq 98\%$  nucleotide identity to *radC*, the gene which flanked the other end  
557 of *acrIIA22*-encoding genomic islands (again, we used the variant from contig number 1 in  
558 Supplemental Table 3; its sequence is also in Supplemental Table 5). In total, this search yielded  
559 258 contig sequences; nucleotide sequences and annotations for these contigs are provided in  
560 Supplementary Dataset 5. We then searched for *acrIIA22* homologs in these sequences using  
561 tblastn, again observing them in genomic islands and prophage genomes (these prophages were  
562 assembled as part of the 258 contigs). In total, this search revealed 320 *acrIIA22* homologs from  
563 258 contigs. The 258 genomic islands from these sequences were retrieved manually by  
564 extracting all nucleotides between the *purF* and *radC* genes. These extracted sequences were  
565 then clustered at 100% nucleotide identity with the sequence analysis software *geneious* to  
566 identify 128 unique genomic islands.

567 Combined, our two searches yielded 461 *AcrIIA22* sequences from these metagenomic  
568 databases that spanned 410 contig sequences. The 461 *AcrIIA22* homologs broke down into 410  
569 that clustered with the genomic island-like sequences (we specifically searched for genomic  
570 islands) and 51 that clustered with prophage-like homologs (we never directly searched for  
571 prophages). We then combined these 461 *AcrIIA22* sequences with those from NCBI and IMG/VR  
572 and clustered the group on 100% amino acid identity to reveal 30 unique proteins. To achieve  
573 this, we used the software *cd-hit*<sup>43</sup> with the following parameters: -d 0 -g 1 -aS 1.0 -c 1.0. These  
574 30 sequences were numbered to match their parent contig (as indicated in Supplemental Table  
575 3) and used to create the phylogenetic tree depicted in Figure 3A. For *AcrIIA22* homologs found  
576 outside NCBI, the nucleotide sequences and annotations their parent contigs can be found in  
577 Supplementary Datasets 1 and 2. This information can be retrieved for NCBI sequences via their  
578 accession numbers (which are shown in Figure 3A). The NCBI gene sequences also used in  
579 functional assays (Figure 3B) have been reprinted in Supplemental Table 5, for convenience.

## 580 **Annotation and phylogenetic assignment of metagenomic assemblies**

581 Contig sequences from IMG/VR, the Pasolli metagenomic assemblies, and some NCBI  
582 entries lacked annotations, making it difficult to make inferences about *acrIIA22*'s genomic  
583 neighborhood. To facilitate these insights, we annotated all contigs as follows. We used the gene-  
584 finder *MetaGeneMark*<sup>44</sup> to predict open reading frames (ORFs) using default parameters. We  
585 then used their amino acid sequences in a profile HMM search with *HMMER3*<sup>45</sup> against  
586 *TIGRFAM*<sup>46</sup> and *Pfam*<sup>47</sup> profile HMM databases. The highest scoring profile was used to annotate

587 each ORF. We annotated these contigs to facilitate genomic neighborhood analyses for *acrIIA22*  
588 and not to provide highly accurate functional predictions of their genes. Thus, we erred on the  
589 side of promiscuously assigning gene function and our annotations should be treated with the  
590 appropriate caution. From these annotated contigs, we immediately observed several examples  
591 of *acrIIA22*-encoding prophages (we noticed 35-40 kilobase insertions within some contigs that  
592 contained mostly co-linear genes with key phage functions annotated). As a simple means to  
593 sample this phage diversity, we manually extracted nine examples of these prophage sequences  
594 (their raw sequences and annotated genomes can be found in Supplementary Datasets 3 and 4).  
595 Annotations were imported to in the sequence analysis suite Geneious Prime 2020 v1.1 for  
596 manual inspection of genome neighborhoods.

597 We used the genome taxonomy database (GTDB) convention for all sequences discussed  
598 in this manuscript<sup>48</sup>. In part, this was because all *acrIIA22* genomes are found in *Clostridial*  
599 genomes, which are notoriously polyphyletic in NCBI taxonomies (for instance, the NCBI genus  
600 appears in GTDB genera and 29 GTDB families)<sup>49</sup>. All SGBs that we retrieved from the Pasolli  
601 assemblies were assigned taxonomy as part of that work and were called *Clostridium* sp. CAG-  
602 217. Similarly, NCBI assemblies that encoded the most closely *acrIIA22* homologs to our original  
603 hit were assigned to the GTDB genus CAG-217<sup>48,49</sup>. The raw assembly data from the Pasolli  
604 database was not assigned a taxonomic label but was nearly identical in nucleotide composition  
605 to the CAG-217 contigs (Figure 2, Supplementary Datasets 1 and 2). Therefore, we also refer to  
606 these sequences as originating in CAG-217 genomes but take care to indicate which sequences  
607 have been assigned a rigorous taxonomy and which ones for which taxonomy has been inferred  
608 in this fashion (Supplemental Table 3).

### 609 **Comparing genes in genomic islands to phage genomes**

610 We first examined the annotated genes within each of the 128 unique genomic islands.  
611 Manual inspection revealed 54 unique gene arrangements (which differed in gene content and  
612 orientation). We then selected one representative from each arrangement and extracted all amino  
613 acid sequences from each encoded gene (n=506). Next, we collapsed these 506 proteins into  
614 orthologous groups by clustering at 65% amino acid using cd-hit with the following parameters: -  
615 d 0 -g 1 -aS 0.95 -c 0.65. These cluster counts were used to generate the histogram depicted in  
616 Figure 2C. To determine which protein families may also be phage encoded, the longest  
617 representative from each cluster with at least two sequences was queried against the database  
618 of nine CAG-217 phages described in the section entitled “Annotation and phylogenetic  
619 assignment of metagenomic assemblies”. We used tblastn with default parameters to perform this  
620 search, which revealed that some proteins in the CAG-217 genomic islands have homologs in  
621 prophage genomes that are out-of-frame with respect to the MetaGeneMark annotations depicted  
622 in Figure 2A.

### 623 **Phylogenetic tree of *AcrIIA22* homologs**

624 The 30 unique *AcrIIA22* homologs we retrieved were used to create the phylogeny  
625 depicted in Figure 3A. These sequences were aligned using the sequence alignment tool in the  
626 sequence analysis suite Geneious Prime 2020 v1.1. This alignment is provided as Supplementary  
627 Dataset 6. From this alignment, the phylogenetic tree in Figure 3A was generated using PhyML  
628 with the LG substitution model and 100 bootstraps. Coloration and tip annotations were then  
629 added in Adobe Illustrator.

630



## 631 Identification of CRISPR-Cas systems and Acrs in CAG-217 assemblies

632 To determine the type and distribution of CRISPR-Cas systems and Acrs in CAG-217  
633 genomes, we downloaded all assembly data for the 779 SGBs assigned to CAG-217 in Pasolli  
634 *et. al*<sup>18</sup> (bin 4303). We then predicted CRISPR-Cas systems for all 779 assemblies in bulk using  
635 the command line version of the CRISPR-Cas prediction suite, cctyper<sup>50</sup>. Specifically, we used  
636 version 1.2.1 of cctyper with the following options: --prodigal meta --keep\_tmp. To identify type II-  
637 A Acrs, we first downloaded representative sequences for each of the 21 experimentally  
638 confirmed type II-A Acrs from the unified resource for tracking anti-CRISPRs<sup>51</sup>. We then used  
639 tblastn to query these proteins against the 779 CAG-217 genome bins and considered any hit  
640 with e-value better than 0.001 (which included all hits with >30% identity across 50% of the query).  
641 To check if these Acrs were present in *acrIIA22*-encoding phages, we performed an identical  
642 tblastn search, but this time used the set of nine *acrIIA22*-encoding prophages as a database.

## 643 Recombinant protein overexpression and purification

644 The AcrIIA22 protein and its mutants were codon optimized for *E. coli* (Genscript or SynBio  
645 Technologies) and the gene construct was cloned into the pET15HE<sup>12</sup> plasmid to contain an N-  
646 terminal, thrombin-cleavable 6XHistidine tag. Constructs were transformed and overexpressed in  
647 BL21 (DE3) RIL *E. coli* cells. A 10 mL overnight culture (grown in LB + 100 µg/mL ampicillin) was  
648 diluted 100-fold into the same media and grown at 37°C with shaking to an OD600 of 0.8, followed  
649 by induction with 0.5 mM IPTG. The culture was shaken for an additional 3 hours at 37°C. Cells  
650 were harvested by centrifugation and the pellet stored at -20°C until purification.

651 Cell pellets were resuspended in 25 mM Tris, pH 7.5, 300 mM NaCl, 20 mM imidazole (Lysis  
652 Buffer) and lysed by sonication on ice. The lysate was centrifuged in an SS34 rotor at 18,000 rpm  
653 for 25 minutes, followed by filtering through a 5 µm syringe filter (Millipore #SLSV025LS). The  
654 clarified lysate was bound using the batch method to Ni-NTA agarose resin (Qiagen) at 4°C for 1  
655 hour. The resin was transferred to a gravity column (Biorad), washed with >50 column volumes  
656 of Lysis Buffer and eluted with 25 mM Tris, pH 7.5, 300 mM NaCl, 200 mM imidazole. The protein  
657 was diluted with 2 column volumes of 25 mM Tris, pH 7.5 and purified on a HiTrapQ column (GE  
658 Healthcare) using a 20 mL gradient from 150 mM to 1 M NaCl in 25 mM Tris, pH 7.5. Peak  
659 fractions were pooled, concentrated and buffer exchanged into 200 mM NaCl, 25 mM Tris, pH  
660 7.5 using an Amicon Ultra centrifugal filter with a 3,000 molecular weight cutoff (Millipore,  
661 UFC900324), then cleaved in an overnight 4°C incubation with biotinylated thrombin (EMD  
662 Millipore). Streptavidin agarose slurry (Novagen) was incubated with cleaved protein at 4°C for  
663 30 minutes to remove thrombin. The sample was then passed through a 0.22 µm centrifugal filter  
664 and loaded onto a HiLoad 16/60 Superdex 200 prep grade size exclusion column (Millipore  
665 Sigma) equilibrated in 25 mM Tris, pH 7.5, 200 mM NaCl. The peak fractions were confirmed for  
666 purity by SDS-PAGE. Figure 4C depicts size exclusion chromatography data generated for  
667 thrombin-cleaved AcrIIA22 variants generated using a Superdex75 16/60 (GE HealthCare)  
668 column with 25 mM Tris, pH 7.5, 200mM NaCl. Recombinant AcrIIA4 was purified similarly to  
669 other Acr proteins as previously described<sup>12</sup>, but with the following deviations. First, the  
670 6XHistidine-tagged AcrIIA4 gene was cloned into pET15B rather than pET15HE, which differs by  
671 only by a few bases just upstream of the N-terminal thrombin tag. IPTG was used at 0.2 mM and  
672 cells were harvested after 18 hours of induction at 18°C. Thrombin cleavage also occurred at  
673 18°C. This untagged version was used to help generate Supplemental Figure 5. Peak fractions  
674 for all proteins were pooled, concentrated, flash frozen as single-use aliquots in liquid nitrogen,  
675 and stored at -80°C.

676 SpyCas9 was expressed in *E. coli* from plasmid pMJ806 (addgene #39312) to contain a TEV-  
677 cleavable N-terminal 6XHis-MBP tag and was purified as described previously<sup>12</sup>. Briefly,  
678 sequential steps of purification consisted of Ni-NTA affinity chromatography, TEV cleavage,  
679 Heparin HiTrap chromatography and SEC. The protein was stored in a buffer consisting of 200  
680 mM NaCl, 25 mM Tris (pH 7.5), 5% glycerol, and 2 mM DTT.

681 To perform *in vitro* pulldown experiments, we purified AcrIIA22 and AcrIIA4 proteins with a C-  
682 terminal twin-strep tag. To achieve this, the Acrs were subcloned into pET15B which was  
683 previously engineered to contain a thrombin-cleavable C-terminal twin-strep tag. The protein was  
684 expressed as described above and purified according to the manufacturer's guidelines (IBA Inc.).  
685 Briefly, cell lysates were resuspended in Buffer W (150 mM NaCl, 100 mM Tris, pH 8.0, 1 mM  
686 EDTA) and lysed by sonication. Clarified lysates were then passed over Streptactin-Sepharose  
687 resin using a gravity filtration column. The flow through was passed over the resin an additional  
688 time. The column was washed with a minimum of 20 column volumes of buffer W, followed by  
689 elution in buffer E (150 mM NaCl, 100 mM Tris, pH 8.0 mM, 1 EDTA, 2.5 mM desthiobiotin). The  
690 eluted protein was purified over a HiTrap Q column, followed by SEC in 200 mM NaCl, 25 mM  
691 Tris, 7.5.

## 692 X-ray crystallography and structural analyses

693 An AcrIIA22 crystal was grown using 14mg/mL protein via the hanging drop method using  
694 200mM ammonium nitrate, 40% (+/-)-2-methyl-2,4-pentanediol (MPD, Hampton Research),  
695 10mM MgCl<sub>2</sub> as a mother liquor. Diffraction data was collected at the Argonne National  
696 Laboratory Structural Biology Center synchrotron facility (Beamline 19BM). Data was processed  
697 with HKL2000 in space group P4332, then built and refined using COOT<sup>52</sup> and PHENIX<sup>53</sup>. The  
698 completed 2.80Å structure was submitted to the Protein Data Bank with PDB Code 7JTA. We  
699 submitted this finished coordinate file to the PDBe PISA server (Protein Data Bank Europe,  
700 Protein Interfaces, Surfaces and Assemblies; <http://pdbe.org/pisa/>) which uses free energy and  
701 interface contacts to calculate likely multimeric assemblies<sup>25</sup>. The server calculated tetrameric,  
702 dimeric and monomeric structures to be thermodynamically stable in solution. The tetrameric  
703 assembly matches the molecular weight expected from the size exclusion column elution peak  
704 and is the most likely quaternary structure as calculated by the PISA server. The tetramer gains  
705 -41.8 kcal/mol free energy by solvation when formed and requires an external driving force of 3.1  
706 kcal/mol to disassemble it according to PISA  $\Delta G$  calculations.

## 707 sgRNA generation

708 The single-guide RNA (sgRNA) for use in *in-vitro* experiments was generated as described  
709 previously<sup>12</sup>. It was transcribed from a double-stranded DNA (dsDNA) template by T7 RNA  
710 polymerase using Megashortscript Kit (Thermo Fisher #AM1354). We made the dsDNA template  
711 via one round of thermal cycling (98°C for 90 s, 55°C for 15 s, 72°C for 60 s) in 50  $\mu$ l reactions.  
712 We used the Phusion PCR polymerase mix (NEB) containing 25 pmol each of the following two  
713 oligo sequences (the sequence that binds the protospacer on our pIDTsmart target vector is  
714 underlined):

715 (i) GAAATTAATACGACTCACTATAGGTAATGAAATAAGATCACTACGTTTTAGAGCT  
716 AGAAATAGCAAGTTAAAATAAGGCTAGTCCG

717 (ii) AAAAAAGCACCGACTCGGTGCCACTTTTTCAAGTTGATAACGGACTAGCCTTAT  
718 TTTAACTTGC.

719 The dsDNA templates were then purified using an Oligo Clean and Concentrator Kit  
720 (ZymoResearch) before quantification via the Nanodrop. Reactions were then treated with  
721 DNase, extracted via phenol-chloroform addition followed by chloroform, ethanol precipitated,  
722 resuspended in RNase free water, and frozen at  $-20^{\circ}\text{C}$ . RNA was quantified by Nanodrop and  
723 analyzed for quality on 15% acrylamide/TBE/UREA gels.

#### 724 **Pulldown assay using strep-tagged AcrIIA22 and AcrIIA4**

725 The same buffer was used for pulldowns and to dilute proteins, consisting of 200 mM NaCl,  
726 25 mM Tris (pH 7.5). As a precursor to these assays, 130 pmol SpyCas9 and sgRNA were  
727 incubated together at room temperature for 15 minutes where indicated. SpyCas9, with or without  
728 pre-complexed sgRNA, was then incubated with 230 pmol AcrIIA4 or 320 pmol AcrIIA22 for 25  
729 minutes at room temperature. Subsequently, 50  $\mu\text{l}$  of a 10% slurry of Streptactin Resin (IBA  
730 biosciences #2-1201-002), pre-equilibrated in binding buffer, was added to the binding reactions  
731 and incubated at  $4^{\circ}\text{C}$  on a nutator for 45 minutes. Thereafter all incubations and washes were  
732 carried out at  $4^{\circ}\text{C}$  or on ice. Four total washes of this resin were performed, which included one  
733 tube transfer. Washes proceeded via centrifugation at 2000 rpm for one minute, aspiration of the  
734 supernatant with a 25-gauge needle, and resuspension of the beads in 100  $\mu\text{l}$  binding buffer.  
735 Strep-tagged proteins were eluted via suspension in 40  $\mu\text{l}$  of 1x BXT buffer (100 mM Tris-Cl, 150  
736 mM NaCl, 1 mM EDTA, 50 mM Biotin, pH 8.0) and incubated for 15 min at room temperature.  
737 After centrifugation, 30  $\mu\text{l}$  of supernatant was removed and mixed with 4X reducing sample buffer  
738 (Thermo Fisher). Proteins then separated by SDS PAGE on BOLT 4–12% gels in MES buffer  
739 (Invitrogen) and visualized by Coomassie staining.

#### 740 **SpyCas9 linear DNA cleavage assay**

741 All SpyCas9 cleavage reactions using linear DNA were performed in the following  
742 cleavage buffer: 20mM Tris HCl (pH7.5), 5% glycerol, 100mM KCl, 5mM MgCl<sub>2</sub>, 1mM DTT. In  
743 preparation for these reactions, all proteins were diluted in 30 mM NaCl / 25 mM Tris, pH 7.4 /  
744 2.7mM KCl, whereas all DNA and sgRNA reagents were diluted in nuclease-free water. Where  
745 indicated, SpyCas9 (0.36  $\mu\text{M}$ ) was incubated with sgRNA (0.36  $\mu\text{M}$ ) for 10 minutes at room  
746 temperature. Before use, sgRNA was melted at  $95^{\circ}\text{C}$  for five minutes and then slowly cooled at  
747 0.1  $^{\circ}\text{C}/\text{s}$  to promote proper folding. SpyCas9 (either pre-complexed with sgRNA or not, as  
748 indicated in Supplemental Figure 6) was then incubated for 10 minutes at room temperature with  
749 AcrIIA4 (2.9  $\mu\text{M}$ ) or AcrIIA22 at the following concentrations: [23.2, 11.6, 5.8, and 2.9  $\mu\text{M}$ ]. As  
750 substrate, the plasmid pIDTsmart was linearized by restriction digest and used at a final  
751 concentration of 3.6 nM. The reaction was initiated by the addition of this DNA substrate in  
752 isolation or in combination with sgRNA (0.36  $\mu\text{M}$ ) as indicated in Supplemental Figure 6.  
753 Reactions were immediately moved to a  $37^{\circ}\text{C}$  incubator and the reaction stopped after fifteen  
754 minutes via the addition of 0.2% SDS/100 mM EDTA and incubating at  $75^{\circ}\text{C}$  for five minutes.  
755 Samples were then run on a 1.5% TAE agarose gel at 120V for 40 minutes. Densitometry was  
756 used to calculate the proportion of DNA cleaved by SpyCas9 via band intensities quantified using  
757 the BioRad ImageLab software v5.0.

## 758 ***In vivo* assay to assess impact of AcrIIA22 on plasmid topology**

759 In all experiments, cultures were first grown overnight at 37°C with shaking at 220 rpm in  
760 LB with 0.5mM IPTG, spectinomycin (at 50 µg/mL), and kanamycin (at 50 µg/mL). Then, these  
761 overnight cultures were diluted 1:50 into LB with 0.5mM IPTG, spectinomycin (at 50 µg/mL), and,  
762 where indicated, doxycycline (at 100 ng/mL, to induce *acrs*). Cultures were grown at 37°C with  
763 shaking at 220 rpm and, if indicated, 0.2% (L)-arabinose was added after two hours of growth to  
764 induce *spyCas9* expression. The next morning, cultures were centrifuged at 4100g and plasmids  
765 purified using a miniprep kit (Qiagen). The concentration of dsDNA in each miniprep was  
766 measured using the Qubit-4 fluorometer and the associated dsDNA high sensitivity assay kit  
767 (Invitrogen). For each sample with a *SpyCas9*-expressing plasmid, 150ng of DNA was digested  
768 with the restriction enzyme *HincII* (NEB) per manufacturer's recommendations, except that  
769 digests were incubated overnight before being stopped by heating at 65°C for 20 minutes. This  
770 restriction enzyme will cut once, only in the *SpyCas9* plasmid, to linearize it. This allowed us to  
771 visualize the *SpyCas9* plasmid as a single band, which served two purposes: (i) it allowed us to  
772 more easily identify bands from *acrIIA22*-encoding plasmids (which had not been digested), and  
773 (ii) it served as an internal control for plasmid DNA that is unaffected by *SpyCas9* targeting or  
774 *AcrIIA22* expression (Supplemental Figure 2). Following restriction digest, 30ng of sample was  
775 analyzed via gel electrophoresis using a 1% TAE-agarose gel run at 120V for between 45 and 60  
776 minutes. In samples that lacked a *SpyCas9*-expressing plasmid, 30ng of purified plasmid was  
777 directly analyzed by gel electrophoresis, as described previously.

## 778 ***In vitro* AcrIIA22 plasmid nicking assay**

779 Except for the divalent cation experiment, all reactions were performed using NEB buffer  
780 3.1 (100 mM NaCl, 50 mM Tris-HCl, pH 7.9, 10 mM MgCl<sub>2</sub>, 100 µg/mL BSA). To determine cation  
781 preference, the same reaction buffer was re-created, but MgCl<sub>2</sub> was omitted. All proteins were  
782 diluted in 130 mM NaCl, 25 mM Tris, pH 7.4, 2.7 mM KCl. DNA was diluted in nuclease-free water.  
783 In the cation preference experiment, 60 µM *AcrIIA22* and 6 nM of purified pIDTsmart plasmid DNA  
784 were used. All other reactions were set up with the *AcrIIA22* final concentrations indicated in  
785 Figure 5 and Supplemental Figure 7. In the cation preference experiment, reactions were started  
786 by adding 10 mM of the indicated cation. All other reactions were initiated via the addition of 2 nM  
787 pIDTsmart plasmid DNA. In all cases, reactions were immediately transferred to a 37°C incubator.  
788 At 0.5, 1, 2, 4, 6, or 20-hour timepoints, a subset of the reaction was removed and run on a 1%  
789 TAE agarose gel at 120V for 40 minutes. For the cation preference experiment, only the 2-hour  
790 timepoint was considered and the reaction was stopped via the addition of NEB loading buffer  
791 and 100 mM EDTA. In this case, DNA was visualized on a 1% TBE gel run for 60 minutes at  
792 110V. Densitometry was used to calculate the proportion of DNA in each topological form via  
793 band intensities quantified using the BioRad ImageLab software v5.0.

## 794 ***SpyCas9* cleavage kinetics assay**

795 Except where indicated in Supplemental Figure 9B, all cleavage reactions were performed  
796 in the following cleavage buffer: 20mM Tris HCl (pH7.5), 5% glycerol, 100mM KCl, 5mM MgCl<sub>2</sub>,  
797 1mM DTT. In preparation for these reactions, all proteins were diluted in 30 mM NaCl / 25 mM  
798 Tris, pH 7.4 / 2.7mM KCl, whereas all DNA and sgRNA reagents were diluted in nuclease-free



799 water. NEB Buffer 3.1 (100 mM NaCl, 50 mM Tris-HCl, pH 7.9, 10 mM MgCl<sub>2</sub>, 100 µg/mL BSA)  
800 was used as a reaction buffer in Supplemental Figure 9B.

801 In preparation for these reactions, purified pDTSmart plasmid was pre-treated with either  
802 AcrlIA22, the nickase Nb.Bss.SI (NEB), or no enzyme. For the AcrlIA22 pre-treatment, 3.1 µg of  
803 plasmid was incubated with 230 µM AcrlIA22 and the plasmid nicked as described previously.  
804 Plasmid nicking with Nb.Bss.SI proceeded via manufacturer's recommendations (NEB). Both  
805 reactions were incubated at 37 °C for 2 hours. To isolate the nicked plasmid, samples were then  
806 run on a 1.5% agarose gel for 2 hours and the open-circle form of the plasmid was excised and  
807 purified using the Zymo Research Gel DNA Recovery Kit. Untreated plasmid was also purified via  
808 gel extraction. Plasmid yield was quantified using a Nanodrop.

809 To determine SpyCas9's substrate preference, we incubated each pre-treated plasmid  
810 substrate with SpyCas9 and looked for the appearance of a linearized plasmid as indication of  
811 SpyCas9 digestion. In all cases, SpyCas9 was used at a final concentration of 31.2 nM. To begin  
812 the reaction, DNA substrate and sgRNA were added simultaneously to the reaction mix and the  
813 samples moved immediately from ice to 37 °C and incubated for either 1 or 5 minutes. We noticed  
814 that the digestion reaction proceeded too quickly with NEB Buffer 3.1 to detect SpyCas9's  
815 substrate preference (i.e., the substrates were all rapidly linearized Supplemental Figure 9B). The  
816 cleavage buffer used in most reactions (detailed atop this section) was chosen because it slowed  
817 digestion kinetics so that we could detect SpyCas9's substrate preference. Before addition to the  
818 reaction, sgRNA was melted at 95°C for five minutes and then slowly cooled at 0.1 °C/s to promote  
819 proper folding. At each timepoint, 5 µl of the reaction was removed and the reaction was stopped  
820 using 0.2% SDS/100 mM EDTA, then incubating at 75°C for 5 minutes. Samples were run on a  
821 1.5% TAE gel at 120V for 40 minutes.

## 822 **Acknowledgements**

823 We thank Kaylee Dillard, Ilya Finkelstein, and Tera Levin for comments on the manuscript.  
824 Use of the Advanced Photon Source, an Office of Science User Facility operated for the U.S.  
825 Department of Energy (DOE) Office of Science by Argonne National Laboratory, was supported  
826 by the U.S. DOE under Contract No. DE-AC02-06CH11357. This work was supported by a Helen  
827 Hay Whitney Foundation postdoctoral fellowship awarded to KJF, a Seattle University summer  
828 faculty fellowship to BKK, NIH grant R01GM105691 and discretionary funding from the Fred  
829 Hutchinson Cancer Research Center to BLS, and grants from the G. Harold and Leila Y. Mathers  
830 Foundation and the Howard Hughes Medical Institute to HSM. The funders played no role in study  
831 design, data collection and interpretation, or the decision to publish this study. HSM is an  
832 Investigator of the Howard Hughes Medical Institute.

## 833 **Competing Interests**

834 All authors declare no significant competing financial, professional, or personal interests that  
835 might have influenced the performance or presentation of the work described in this manuscript.

836

## 837 References

- 838 1 Barrangou, R. *et al.* CRISPR provides acquired resistance against viruses in  
839 prokaryotes. *Science* **315**, 1709-1712, doi:10.1126/science.1138140 (2007).
- 840 2 Marraffini, L. A. & Sontheimer, E. J. CRISPR interference limits horizontal gene transfer  
841 in staphylococci by targeting DNA. *Science* **322**, 1843-1845,  
842 doi:10.1126/science.1165771 (2008).
- 843 3 Deveau, H. *et al.* Phage response to CRISPR-encoded resistance in *Streptococcus*  
844 *thermophilus*. *J Bacteriol* **190**, 1390-1400, doi:10.1128/JB.01412-07 (2008).
- 845 4 Mendoza, S. D. *et al.* A bacteriophage nucleus-like compartment shields DNA from  
846 CRISPR nucleases. *Nature* **577**, 244-248, doi:10.1038/s41586-019-1786-y (2020).
- 847 5 Malone, L. M. *et al.* A jumbo phage that forms a nucleus-like structure evades CRISPR-  
848 Cas DNA targeting but is vulnerable to type III RNA-based immunity. *Nat Microbiol* **5**, 48-  
849 55, doi:10.1038/s41564-019-0612-5 (2020).
- 850 6 Bryson, A. L. *et al.* Covalent Modification of Bacteriophage T4 DNA Inhibits CRISPR-  
851 Cas9. *mBio* **6**, e00648, doi:10.1128/mBio.00648-15 (2015).
- 852 7 Stanley, S. Y. & Maxwell, K. L. Phage-Encoded Anti-CRISPR Defenses. *Annu Rev*  
853 *Genet* **52**, 445-464, doi:10.1146/annurev-genet-120417-031321 (2018).
- 854 8 Trasanidou, D. *et al.* Keeping crispr in check: diverse mechanisms of phage-encoded  
855 anti-crisprs. *FEMS Microbiol Lett*, doi:10.1093/femsle/fnz098 (2019).
- 856 9 Davidson, A. R. *et al.* Anti-CRISPRs: Protein Inhibitors of CRISPR-Cas Systems. *Annu*  
857 *Rev Biochem* **89**, 309-332, doi:10.1146/annurev-biochem-011420-111224 (2020).
- 858 10 Wiegand, T., Karambelkar, S., Bondy-Denomy, J. & Wiedenheft, B. Structures and  
859 Strategies of Anti-CRISPR-Mediated Immune Suppression. *Annu Rev Microbiol* **74**, 21-  
860 37, doi:10.1146/annurev-micro-020518-120107 (2020).
- 861 11 Hatfull, G. F. Dark Matter of the Biosphere: the Amazing World of Bacteriophage  
862 Diversity. *J Virol* **89**, 8107-8110, doi:10.1128/JVI.01340-15 (2015).
- 863 12 Forsberg, K. J. *et al.* Functional metagenomics-guided discovery of potent Cas9  
864 inhibitors in the human microbiome. *eLife* **8**, e46540, doi:10.7554/eLife.46540 (2019).
- 865 13 Szczelkun, M. D. *et al.* Direct observation of R-loop formation by single RNA-guided  
866 Cas9 and Cascade effector complexes. *Proc Natl Acad Sci U S A* **111**, 9798-9803,  
867 doi:10.1073/pnas.1402597111 (2014).
- 868 14 Farasat, I. & Salis, H. M. A Biophysical Model of CRISPR/Cas9 Activity for Rational  
869 Design of Genome Editing and Gene Regulation. *PLoS Comput Biol* **12**, e1004724,  
870 doi:10.1371/journal.pcbi.1004724 (2016).
- 871 15 Ivanov, I. E. *et al.* Cas9 interrogates DNA in discrete steps modulated by mismatches  
872 and supercoiling. *Proc Natl Acad Sci U S A* **117**, 5853-5860,  
873 doi:10.1073/pnas.1913445117 (2020).
- 874 16 Tsui, T. K. M., Hand, T. H., Duboy, E. C. & Li, H. The Impact of DNA Topology and  
875 Guide Length on Target Selection by a Cytosine-Specific Cas9. *ACS Synth Biol* **6**, 1103-  
876 1113, doi:10.1021/acssynbio.7b00050 (2017).
- 877 17 Paez-Espino, D. *et al.* IMG/VR v.2.0: an integrated data management and analysis  
878 system for cultivated and environmental viral genomes. *Nucleic acids research* **47**,  
879 D678-D686, doi:10.1093/nar/gky1127 (2019).
- 880 18 Pasolli, E. *et al.* Extensive Unexplored Human Microbiome Diversity Revealed by Over  
881 150,000 Genomes from Metagenomes Spanning Age, Geography, and Lifestyle. *Cell*  
882 **176**, 649-662 e620, doi:10.1016/j.cell.2019.01.001 (2019).

- 883 19 Dobrindt, U., Hochhut, B., Hentschel, U. & Hacker, J. Genomic islands in pathogenic and  
884 environmental microorganisms. *Nat Rev Microbiol* **2**, 414-424, doi:10.1038/nrmicro884  
885 (2004).
- 886 20 Juhas, M. *et al.* Genomic islands: tools of bacterial horizontal gene transfer and  
887 evolution. *FEMS Microbiol Rev* **33**, 376-393, doi:10.1111/j.1574-6976.2008.00136.x  
888 (2009).
- 889 21 Makarova, K. S. *et al.* Evolutionary classification of CRISPR-Cas systems: a burst of  
890 class 2 and derived variants. *Nat Rev Microbiol* **18**, 67-83, doi:10.1038/s41579-019-  
891 0299-x (2020).
- 892 22 Mahendra, C. *et al.* Broad-spectrum anti-CRISPR proteins facilitate horizontal gene  
893 transfer. *Nat Microbiol* **5**, 620-629, doi:10.1038/s41564-020-0692-2 (2020).
- 894 23 Bondy-Denomy, J., Pawluk, A., Maxwell, K. L. & Davidson, A. R. Bacteriophage genes  
895 that inactivate the CRISPR/Cas bacterial immune system. *Nature* **493**, 429-432,  
896 doi:10.1038/nature11723 (2013).
- 897 24 Janowski, R. & Niessing, D. The large family of PC4-like domains - similar folds and  
898 functions throughout all kingdoms of life. *RNA Biol* **17**, 1228-1238,  
899 doi:10.1080/15476286.2020.1761639 (2020).
- 900 25 Krissinel, E. & Henrick, K. Inference of macromolecular assemblies from crystalline  
901 state. *J Mol Biol* **372**, 774-797, doi:10.1016/j.jmb.2007.05.022 (2007).
- 902 26 Steigemann, B., Schulz, A. & Werten, S. Bacteriophage T5 encodes a homolog of the  
903 eukaryotic transcription coactivator PC4 implicated in recombination-dependent DNA  
904 replication. *J Mol Biol* **425**, 4125-4133, doi:10.1016/j.jmb.2013.09.001 (2013).
- 905 27 Werten, S. Identification of the ssDNA-binding protein of bacteriophage T5: Implications  
906 for T5 replication. *Bacteriophage* **3**, e27304, doi:10.4161/bact.27304 (2013).
- 907 28 Werten, S. *et al.* High-affinity DNA binding by the C-terminal domain of the  
908 transcriptional coactivator PC4 requires simultaneous interaction with two opposing  
909 unpaired strands and results in helix destabilization. *J Mol Biol* **276**, 367-377,  
910 doi:10.1006/jmbi.1997.1534 (1998).
- 911 29 Vink, J. N. A. *et al.* Direct Visualization of Native CRISPR Target Search in Live Bacteria  
912 Reveals Cascade DNA Surveillance Mechanism. *Mol Cell* **77**, 39-50 e10,  
913 doi:10.1016/j.molcel.2019.10.021 (2020).
- 914 30 Westra, E. R. *et al.* CRISPR immunity relies on the consecutive binding and degradation  
915 of negatively supercoiled invader DNA by Cascade and Cas3. *Mol Cell* **46**, 595-605,  
916 doi:10.1016/j.molcel.2012.03.018 (2012).
- 917 31 Dorman, C. J. & Ni Bhriain, N. CRISPR-Cas, DNA Supercoiling, and Nucleoid-  
918 Associated Proteins. *Trends Microbiol* **28**, 19-27, doi:10.1016/j.tim.2019.08.004 (2020).
- 919 32 Mattenberger, Y., Silva, F. & Belin, D. 55.2, a phage T4 ORFan gene, encodes an  
920 inhibitor of Escherichia coli topoisomerase I and increases phage fitness. *PLoS One* **10**,  
921 e0124309, doi:10.1371/journal.pone.0124309 (2015).
- 922 33 Johnston, J. V., Nichols, B. P. & Donelson, J. E. Distribution of "minor" nicks in  
923 bacteriophage T5 DNA. *J Virol* **22**, 510-519 (1977).
- 924 34 Roy, D., Huguet, K. T., Grenier, F. & Burrus, V. IncC conjugative plasmids and  
925 SXT/R391 elements repair double-strand breaks caused by CRISPR-Cas during  
926 conjugation. *Nucleic Acids Research*, doi:10.1093/nar/gkaa518 (2020).
- 927 35 Uribe, R. V. *et al.* Discovery and Characterization of Cas9 Inhibitors Disseminated  
928 across Seven Bacterial Phyla. *Cell Host Microbe* **25**, 233-241 e235,  
929 doi:10.1016/j.chom.2019.01.003 (2019).



- 930 36 Osuna, B. A. *et al.* Listeria Phages Induce Cas9 Degradation to Protect Lysogenic  
931 Genomes. *Cell Host Microbe* **28**, 31-40 e39, doi:10.1016/j.chom.2020.04.001 (2020).
- 932 37 Chevallereau, A. *et al.* Exploitation of the Cooperative Behaviors of Anti-CRISPR  
933 Phages. *Cell Host Microbe* **27**, 189-198 e186, doi:10.1016/j.chom.2019.12.004 (2020).
- 934 38 Borges, A. L. *et al.* Bacteriophage Cooperation Suppresses CRISPR-Cas3 and Cas9  
935 Immunity. *Cell* **174**, 917-925 e910, doi:10.1016/j.cell.2018.06.013 (2018).
- 936 39 Landsberger, M. *et al.* Anti-CRISPR Phages Cooperate to Overcome CRISPR-Cas  
937 Immunity. *Cell* **174**, 908-916 e912, doi:10.1016/j.cell.2018.05.058 (2018).
- 938 40 Hooper, D. C. & Jacoby, G. A. Mechanisms of drug resistance: quinolone resistance.  
939 *Ann N Y Acad Sci* **1354**, 12-31, doi:10.1111/nyas.12830 (2015).
- 940 41 Pawluk, A., Davidson, A. R. & Maxwell, K. L. Anti-CRISPR: discovery, mechanism and  
941 function. *Nat Rev Microbiol*, doi:10.1038/nrmicro.2017.120 (2017).
- 942 42 Borges, A. L., Davidson, A. R. & Bondy-Denomy, J. The Discovery, Mechanisms, and  
943 Evolutionary Impact of Anti-CRISPRs. *Annu Rev Virol* **4**, 37-59, doi:10.1146/annurev-  
944 virology-101416-041616 (2017).
- 945 43 Li, W. & Godzik, A. Cd-hit: a fast program for clustering and comparing large sets of  
946 protein or nucleotide sequences. *Bioinformatics* **22**, 1658-1659,  
947 doi:10.1093/bioinformatics/btl158 (2006).
- 948 44 Zhu, W., Lomsadze, A. & Borodovsky, M. Ab initio gene identification in metagenomic  
949 sequences. *Nucleic Acids Res* **38**, e132, doi:10.1093/nar/gkq275 (2010).
- 950 45 Finn, R. D., Clements, J. & Eddy, S. R. HMMER web server: interactive sequence  
951 similarity searching. *Nucleic Acids Res* **39**, W29-37, doi:10.1093/nar/gkr367 (2011).
- 952 46 Haft, D. H. *et al.* TIGRFAMs: a protein family resource for the functional identification of  
953 proteins. *Nucleic Acids Res* **29**, 41-43 (2001).
- 954 47 Bateman, A. *et al.* The Pfam protein families database. *Nucleic Acids Res* **28**, 263-266  
955 (2000).
- 956 48 Parks, D. H. *et al.* A complete domain-to-species taxonomy for Bacteria and Archaea.  
957 *Nat Biotechnol*, doi:10.1038/s41587-020-0501-8 (2020).
- 958 49 Parks, D. H. *et al.* A standardized bacterial taxonomy based on genome phylogeny  
959 substantially revises the tree of life. *Nat Biotechnol* **36**, 996-1004, doi:10.1038/nbt.4229  
960 (2018).
- 961 50 Russel, J., Pinilla-Redondo, R., Mayo-Muñoz, D., Shah, S. A. & Sørensen, S. J.  
962 CRISPRCasTyper: An automated tool for the identification, annotation and classification  
963 of CRISPR-Cas loci. *bioRxiv*, 2020.2005.2015.097824, doi:10.1101/2020.05.15.097824  
964 (2020).
- 965 51 Bondy-Denomy, J. *et al.* A Unified Resource for Tracking Anti-CRISPR Names. *The*  
966 *CRISPR Journal* **1**, 304-305, doi:10.1089/crispr.2018.0043 (2018).
- 967 52 Emsley, P., Lohkamp, B., Scott, W. G. & Cowtan, K. Features and development of Coot.  
968 *Acta Crystallogr D Biol Crystallogr* **66**, 486-501, doi:10.1107/S0907444910007493  
969 (2010).
- 970 53 Adams, P. D. *et al.* PHENIX: a comprehensive Python-based system for macromolecular  
971 structure solution. *Acta Crystallogr D Biol Crystallogr* **66**, 213-221,  
972 doi:10.1107/S0907444909052925 (2010).

**Table 1.** Structural features of AcrIIA22.

| <b>Data collection</b>            |                        |
|-----------------------------------|------------------------|
| Space Group                       | P4332                  |
| <i>Cell Dimensions</i>            |                        |
| a, b, c (Å)                       | 128.56, 128.56, 128.56 |
| $\alpha$ , $\beta$ , $\gamma$ (°) | 90.0, 90.0, 90.0       |
| Resolution (Å)                    | 50.00 - 2.80           |
| $R_{merge}$                       | 0.106 (0.906)          |
| $I/\sigma_I$                      | 17.4 (2.6)             |
| Completeness (%)                  | 98.7 (100.0)           |
| Redundancy                        | 10.4 (10.7)            |
| CC 1/2                            | 0.837                  |
| <b>Refinement</b>                 |                        |
| No. Reflections                   | 9334                   |
| $R_{work}$ ( $R_{free}$ ) (%)     | 22.2 (24.6)            |
| No. Complex in ASU                | 2                      |
| <i>No. atoms</i>                  |                        |
| Protein                           | 810                    |
| Heteroatoms                       | 50                     |
| Water                             | 3                      |
| B-factor                          | 82.82                  |
| <i>R.m.s deviations</i>           |                        |
| Bond lengths (Å)                  | 0.003                  |
| Bond angles (°)                   | 0.610                  |
| <i>Ramachandran</i>               |                        |
| Preferred (%)                     | 98.15                  |
| Allowed (%)                       | 1.85                   |
| Outliers (%)                      | 0                      |

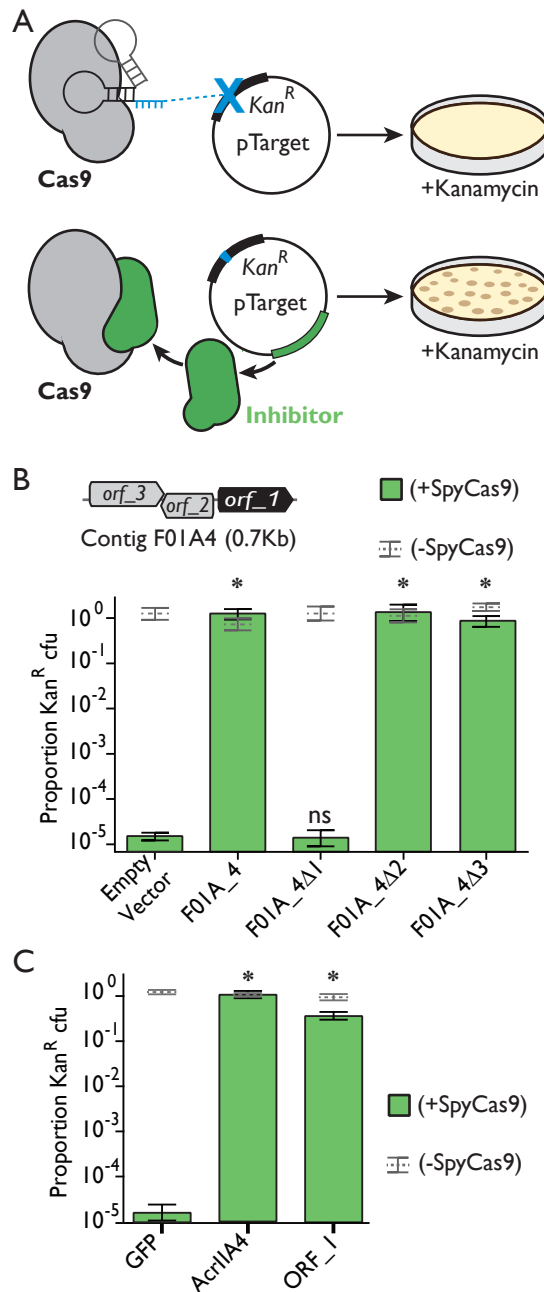

**Figure 1.** *Orf\_1* from the metagenomic contig F01A\_4 encodes a SpyCas9 inhibitor. **(A)** The plasmid protection assay used to reveal SpyCas9 inhibition. Plasmids without SpyCas9 inhibitors are cleaved by Cas9 and do not give rise to Kan<sup>R</sup> colonies. Those with inhibitors withstand SpyCas9 attack and yield colonies. **(B)** An early stop codon in *orf\_1* ( $\Delta 1$ ), but not *orf\_2* or *orf\_3* ( $\Delta 2$  and  $\Delta 3$ ), eliminates the ability of contig F01A\_4 to protect a plasmid from SpyCas9. Asterisks depict statistically significant differences in plasmid retention between the indicated genotype and an empty vector control in SpyCas9-inducing conditions (Student's t-test,  $p < 0.002$ ,  $n = 3$ ); ns indicates no significance. All p-values were corrected for multiple hypotheses using Bonferroni's method. **(C)** Expression of *orf\_1* is sufficient for SpyCas9 antagonism, protecting a plasmid as well as *acrIIA4*. Asterisks are as in panel B but relate to the GFP negative control rather than an empty vector.

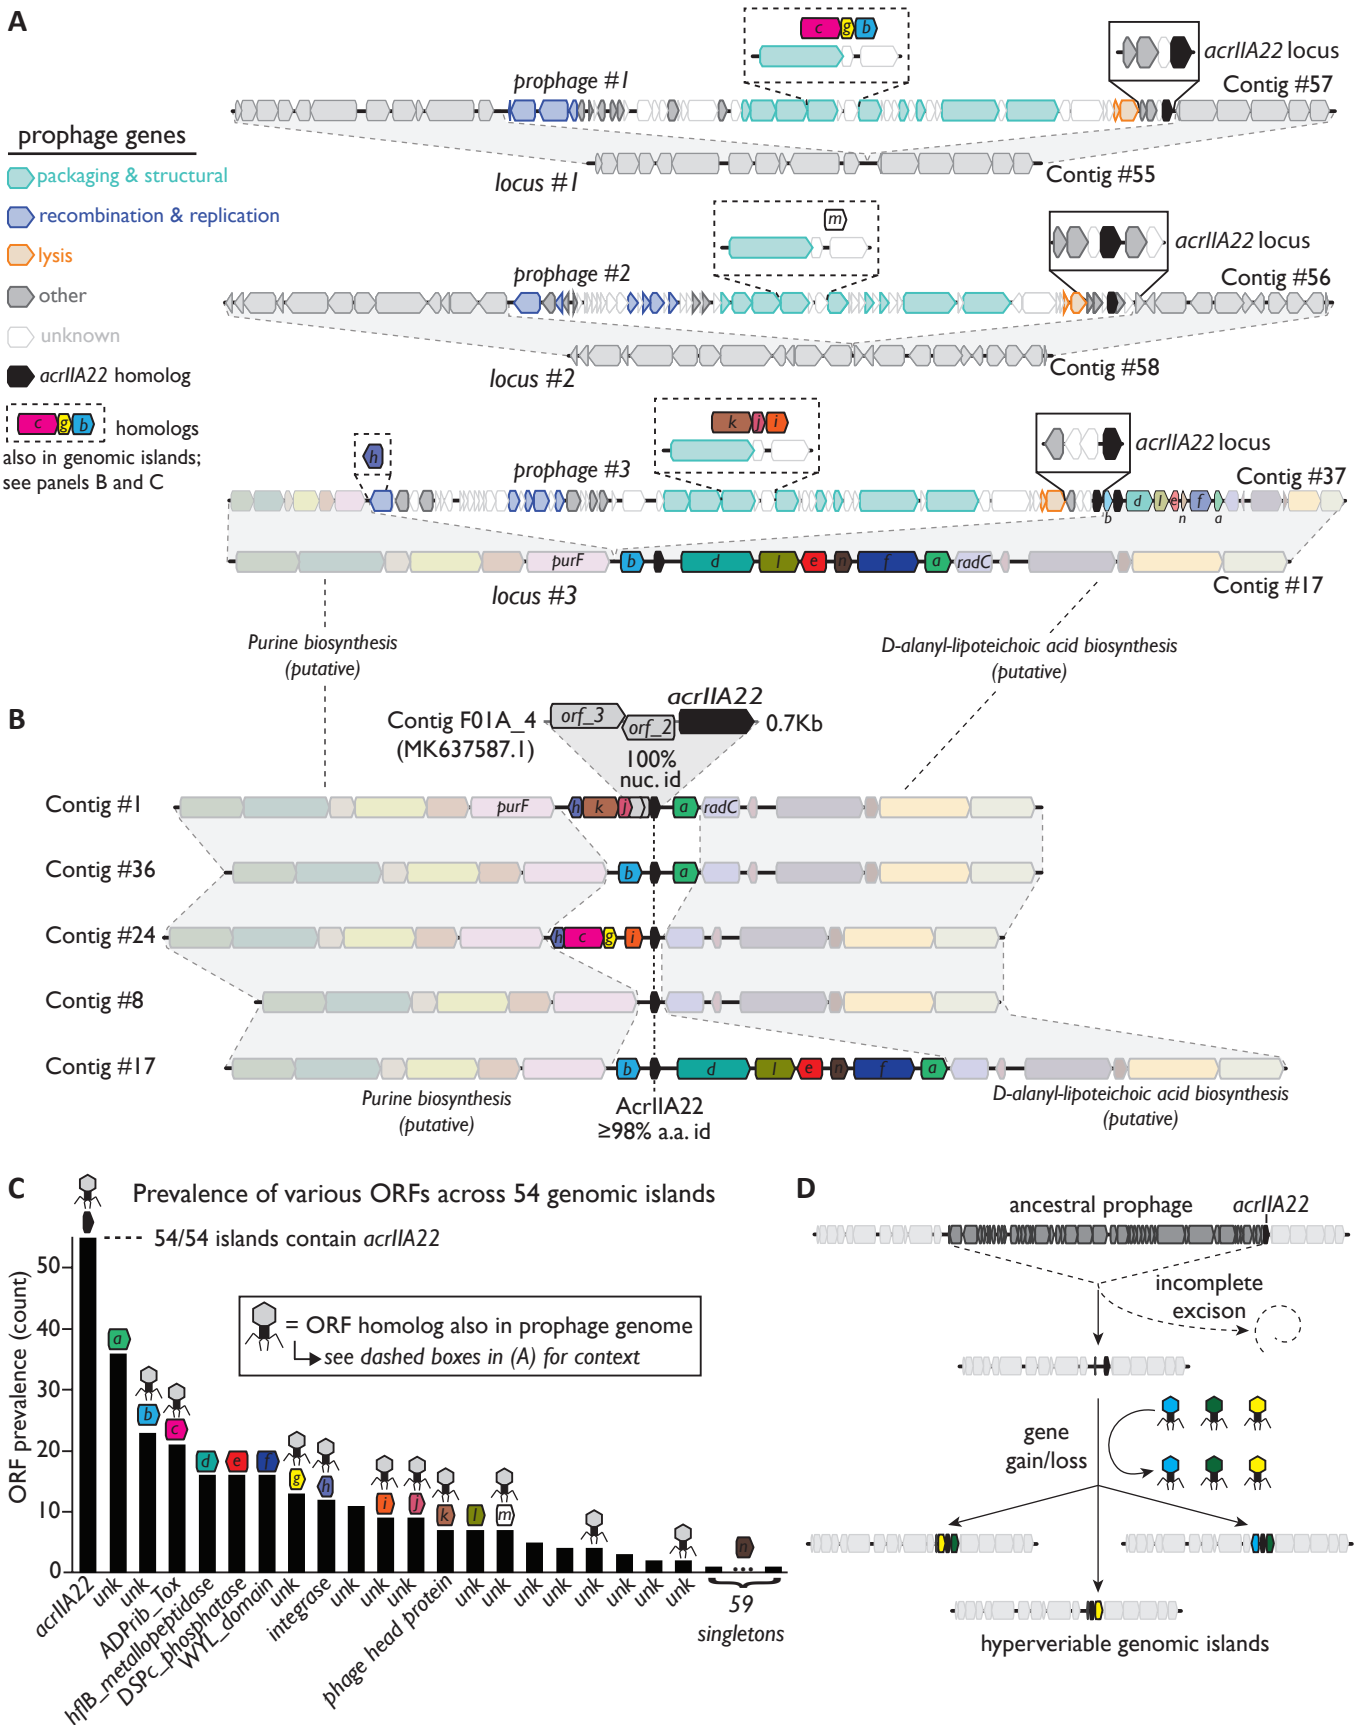

Figure 2. Caption on next page.

**Figure 2.** *AcrIIA22* homologs are found in hypervariable regions of prophage and bacterial genomes. **(A)** Homologs of *acrIIA22* are depicted in three related prophage genomes, integrated at three different genomic loci, revealed by a comparison of prophage-bearing contigs (#57, #56, #37) relative to unintegrated contigs (#55, #58, #17 respectively) that are otherwise nearly identical. Prophage genes are colored by functional category, according to the legend at the left of panel A. Genes immediately adjacent to *acrIIA22* (solid boxes) vary across phages, despite strong relatedness across much of the prophage genomes. Bacterial genes are colored gray, except for in contig #17, which is also depicted in panel B, below. **(B)** Homologs of *acrIIA22* are depicted in diverse genomic islands, including Contig #1, whose sequence has perfect nucleotide identity to the original metagenomic contig we recovered (F01A\_4). All *acrIIA22* homologs in these loci are closely related but differ in their adjacent genes, which often have homologs in the prophages depicted in panel A (dashed boxes). Genomic regions flanking these hypervariable islands are nearly identical to one another and to prophage integration locus #3, as shown by homology to contig #17 from panel A. **(C)** The prevalence of various protein families (clustered at 65% amino acid identity) in a set of 54 unique genomic islands is shown. Each of these islands is flanked by the conserved genes *purF* and *radC* but contains a different arrangement of encoded genes. Domain-level annotations are indicated below each protein family (unk; unknown function). Gene symbols above each protein family are colored and lettered to indicate their counterparts or homologs in panels A and B. The phage capsid icon indicates sequences with homologs in prophage genomes. **(D)** An evolutionary model for the origin of the *acrIIA22*-encoding hypervariable genomic islands depicted in panel B is shown. We propose that *acrIIA22* moved via a phage insertion into a bacterial genomic locus, remained following an incomplete prophage excision event, and its neighboring genes subsequently diversified via horizontal exchange with additional phage genomes. Contigs are numbered to indicate their descriptions in Supplemental Table 3, which contains their metadata, taxonomy, and sequence retrieval information. All sequences and annotations may also be found in Supplementary Datasets 1 and 2.

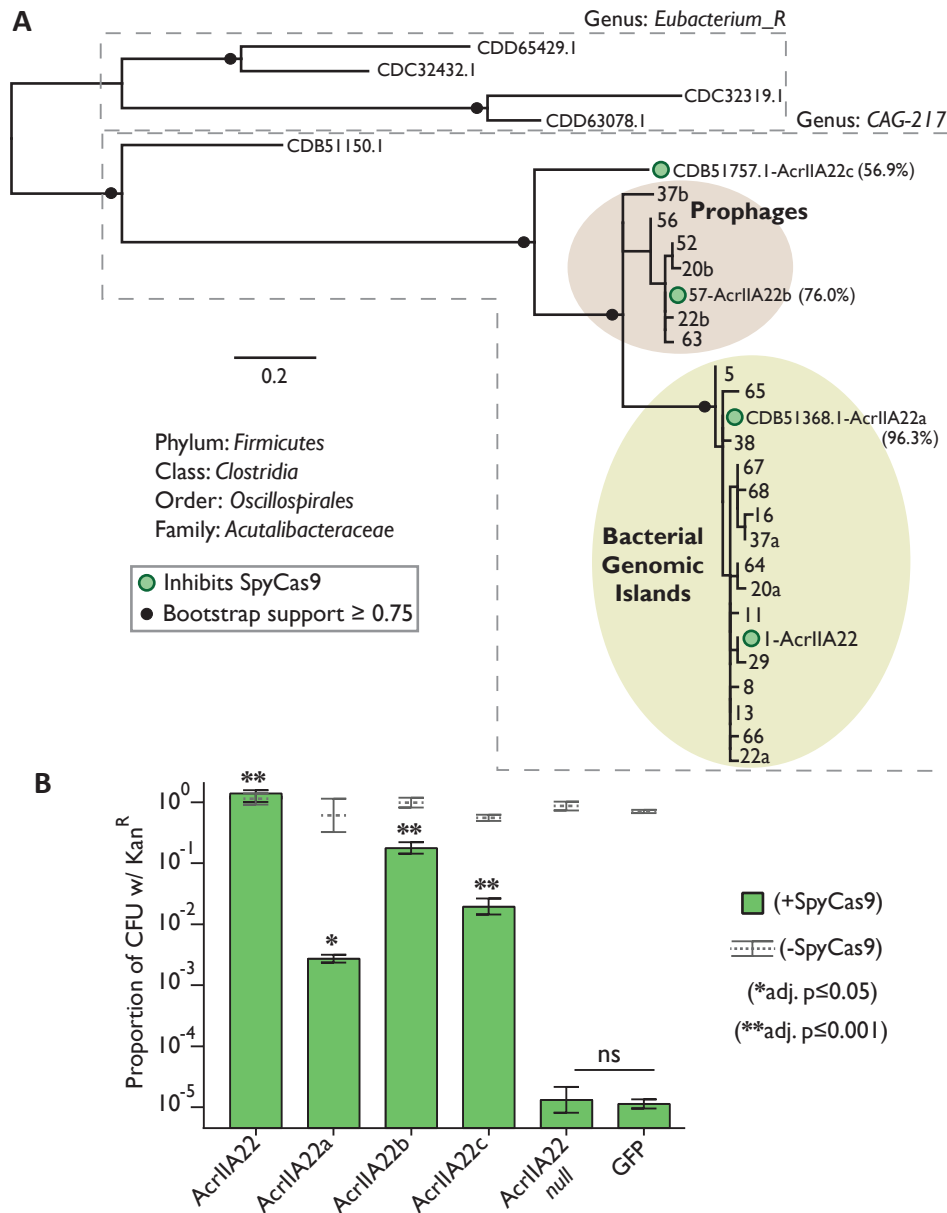

**Figure 3.** AcrIIA22 homologs capable of inhibiting SpyCas9 are common in the unnamed *Clostridial* genus, CAG-217. Phylogenetic classifications were assigned corresponding to the GTDB naming convention (Methods). **(A)** A phylogeny of all unique AcrIIA22 homologs identified from metagenomic and NCBI databases. Prophage sequences are shaded brown and homologs from hypervariable bacterial genomic islands are shaded yellow. Sequences obtained from NCBI are labeled with protein accession numbers. In other cases, AcrIIA22 homologs are numbered to match their contig-of-origin (Supplemental Table 3). In some cases, more than one AcrIIA22 homolog is found on the same contig ('a' or 'b' indicates its presence in a hypervariable genomic island or prophage genome, respectively). Circles at nodes indicate bootstrap support  $\geq 0.75$ . Dashed boxes separate sequences identified from different bacterial genera. Filled green circles indicate homologs that were tested for their ability to inhibit SpyCas9 in the plasmid protection assay in panel B. **(B)** Homologs of AcrIIA22 in CAG-217 genomes inhibit SpyCas9. Asterisks depict statistically significant differences in plasmid retention under SpyCas9-inducing conditions between the indicated sample and a null mutant with an early stop codon in *acrIIA22*, per the legend at right (ns indicates no significance). All p-values were corrected for multiple hypotheses using Bonferroni's method (Student's t-test,  $n=3$ ).



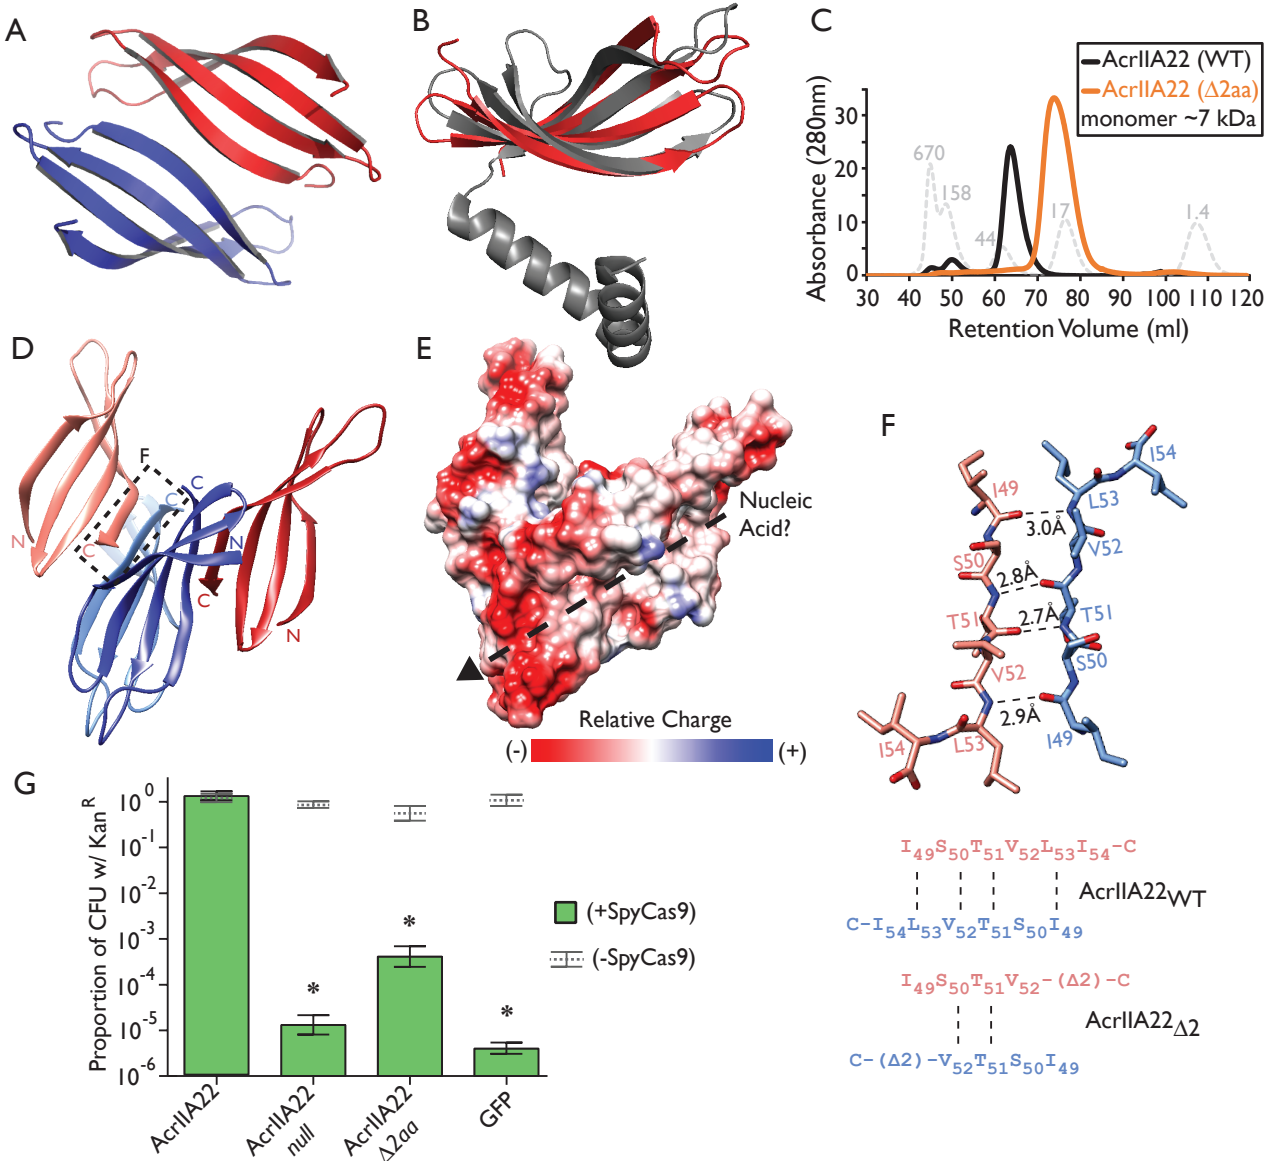

**Figure 4.** AcrIIA22 is a PC4-like protein that oligomerizes and inhibits SpyCas9. **(A)** AcrIIA22's crystal structure reveals a homodimer of two four-stranded  $\beta$ -sheets. **(B)** A monomer of AcrIIA22 (PDB:7JTA) is structurally similar to a predicted single-stranded DNA binding protein, which is proposed to promote recombination in phage T5 (PDB:4BG7, Z-score=6.2, matched residues 15%). **(C)** AcrIIA22 elutes as an oligomer that is 4-5 times the predicted molecular mass of its monomer. The gray, dashed trace depicts protein standards of the indicated molecular weight. The orange trace depicts the elution profile of a two-amino acid C-terminal AcrIIA22 truncation mutant. **(D)** Ribbon diagram of a proposed AcrIIA22 tetramer which requires binding between anti-parallel  $\beta$ -strands at the C-termini of AcrIIA22 monomers to form extended, concave  $\beta$ -sheets. This putative oligomerization interface is indicated by the dashed box and is detailed in panel F. **(E)** Space filling model of the tetrameric AcrIIA22 structure from panel D, with relative charge depicted, highlighting a groove (dashed line with arrowhead) that may accommodate nucleic acids. **(F)** A putative oligomerization interface between the C-termini of two AcrIIA22 monomers is shown with hydrogen bond distances between the polypeptide backbones indicated. The wild-type sequence and truncation mutant are indicated below. Dashed lines indicate potential hydrogen bonds. This interface occurs twice in the putative tetramer, between red-hued and blue-hued monomers in panel D. **(G)** The truncation mutant fails to protect a plasmid from SpyCas9 elimination, similar to an early stop codon mutant (*null*) and a *gfp* negative control. Asterisks depict statistically significant differences in plasmid retention under SpyCas9-inducing conditions between the indicated sample and the wild-type sequence (adj.  $p < 0.002$ , Student's t-test,  $n=3$ ). All  $p$ -values were corrected for multiple hypotheses using Bonferroni's method.



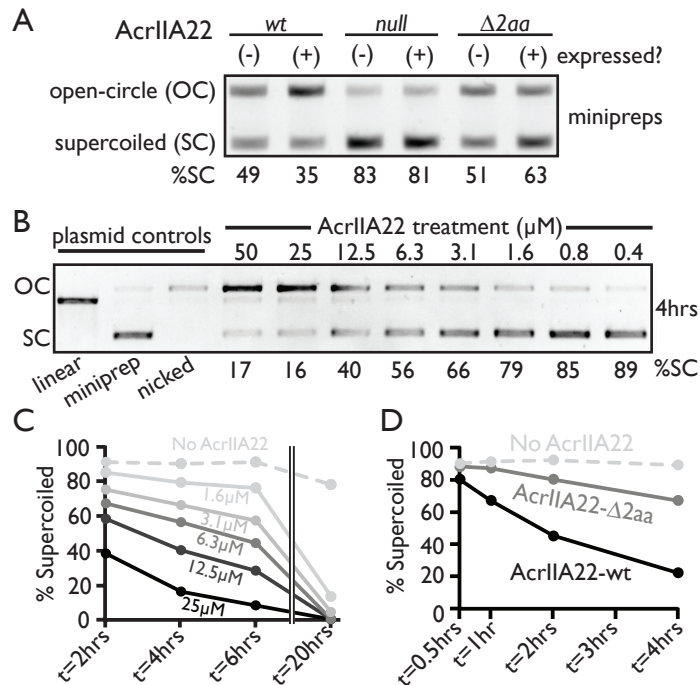

**Figure 5.** AcrIIA22 nicks supercoiled plasmids *in vivo* and *in vitro*. **(A)** Gel electrophoresis of plasmids purified from overnight *E. coli* cultures expressing the indicated genotypes. OC, open-circle plasmid; SC, supercoiled plasmid. %SC indicates the percentage of DNA in the supercoiled form for each sample. **(B)** AcrIIA22 nicks supercoiled plasmids *in vitro*. Supplemental Figure 7 depicts this experiment at additional time points. **(C)** Quantification of AcrIIA22-nicked plasmids in panel B and Supplemental Figure 7. AcrIIA22 nicks plasmids in a time and concentration-dependent manner. **(D)** A nickase assay as in panels B and C shows that the 2-aa truncation mutant is impaired for activity *in vitro*, relative to wild-type AcrIIA22. In both cases, 25  $\mu\text{M}$  protein was used.

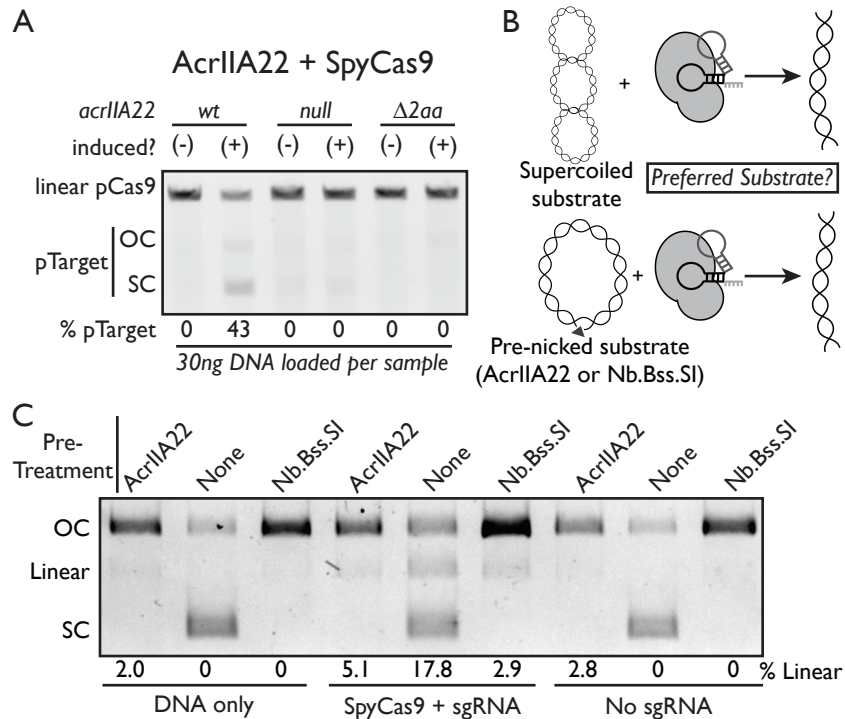

**Figure 6.** AcrIIA22 protects plasmids from SpyCas9 cleavage *in vivo* and *in vitro*. **(A)** Gel electrophoresis of plasmids purified from overnight *E. coli* cultures expressing the indicated *acrIIA22* genotypes and SpyCas9 from a second plasmid. The *acrIIA22*-encoding plasmids are indicated with the 'pTarget' label. OC, open-circle; SC, supercoiled. The SpyCas9 plasmid was linearized via a unique restriction site before electrophoresis. **(B)** Experimental design for the data depicted in panel C. The experiment tests whether SpyCas9 preferentially cleaves a supercoiled or open-circle plasmid target *in vitro*. **(C)** Nicked plasmids are less susceptible to linearization via SpyCas9 cleavage. Plasmid purifications from overnight cultures were either left unmodified or pre-treated with one of two nickase enzymes, AcrIIA22 or Nb.Bss.SI. Linear, open-circle (OC), and supercoiled (SC) plasmid forms are indicated. The percentage of DNA in the linear form is quantified below the gel, where the reaction components are also listed. See Supplemental Figure 9 for these data in different reaction conditions.

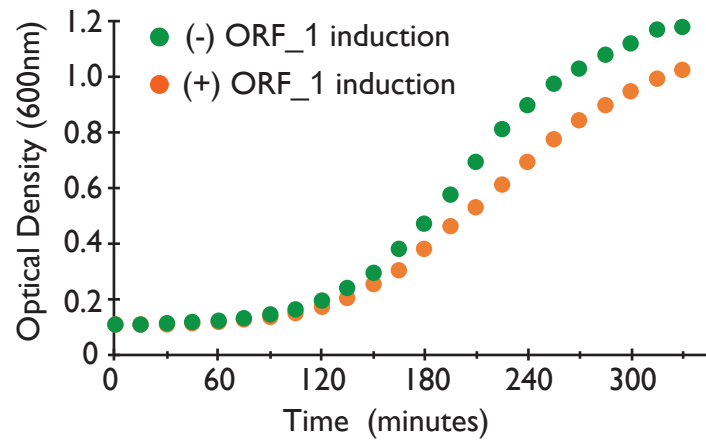

**Supplemental Figure 1.** *Orf\_1* confers mild toxicity in *E. coli*. Growth curves with (orange) and without (green) *orf\_1* induction. These growth data map directly to the cfu data in Figure 1C, demonstrating that anti-SpyCas9 activity occurs under conditions with minimal *orf\_1* toxicity. Samples were removed after six hours of growth to plate for cfus. Growth curves are shown for samples without SpyCas9 induction to ensure that *orf\_1* toxicity is not mitigated due to elimination of its plasmid. Points indicate averages from three replicates. Standard deviations at each timepoint are so small that the error bars do not exceed the bounds of the data point.

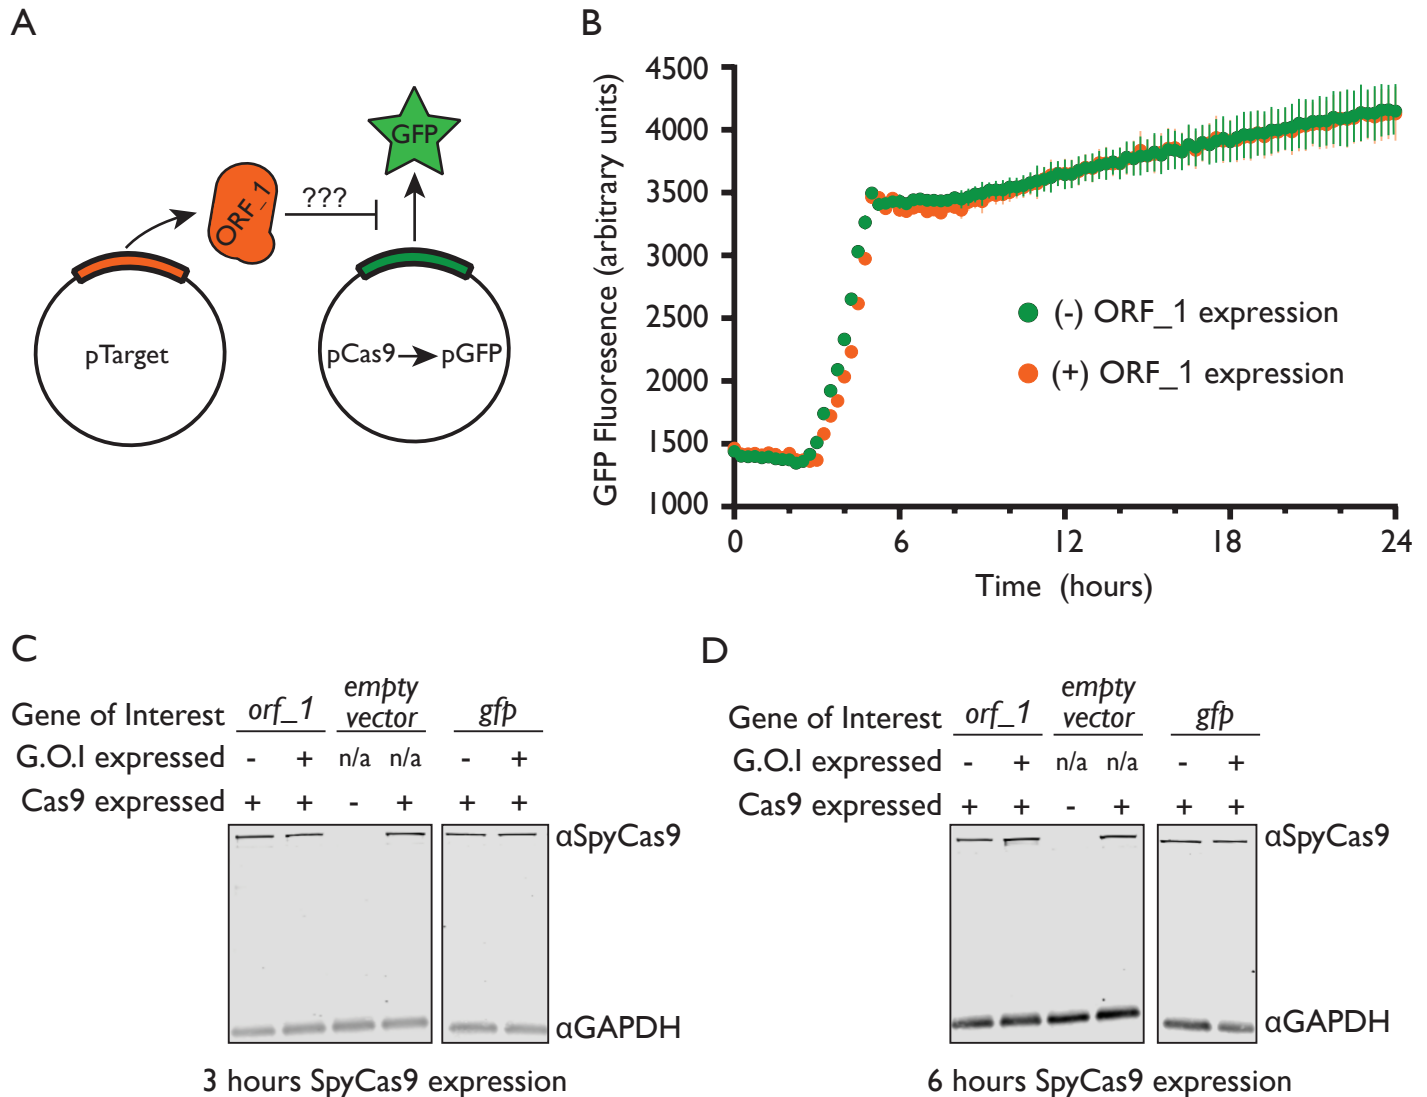

**Supplemental Figure 2.** *Orf\_1* does not impact SpyCas9 expression. **(A)** Cartoon depicting the experimental design for **(B)**. If *ORF\_1* prevented transcription from *pCas9* or altered its copy number, we would expect expression of the *orf\_1* gene to deplete the level of green fluorescence observed from a construct that replaces the *spycas9* gene with *gfp*. **(B)** Fluorescence measurements for the experiment depicted in panel A, throughout an *E. coli* growth curve. *ORF\_1* does not impact GFP expression. Points indicate averages from three replicates, error bars indicate standard deviation. **(C)** A western blot to detect SpyCas9 expression as a function of *ORF\_1* or GFP expression in growing *E. coli* cultures. As an internal control, GAPDH expression was also detected. **(D)** As in panel C, but samples were collected six hours after SpyCas9 induction, instead of three.

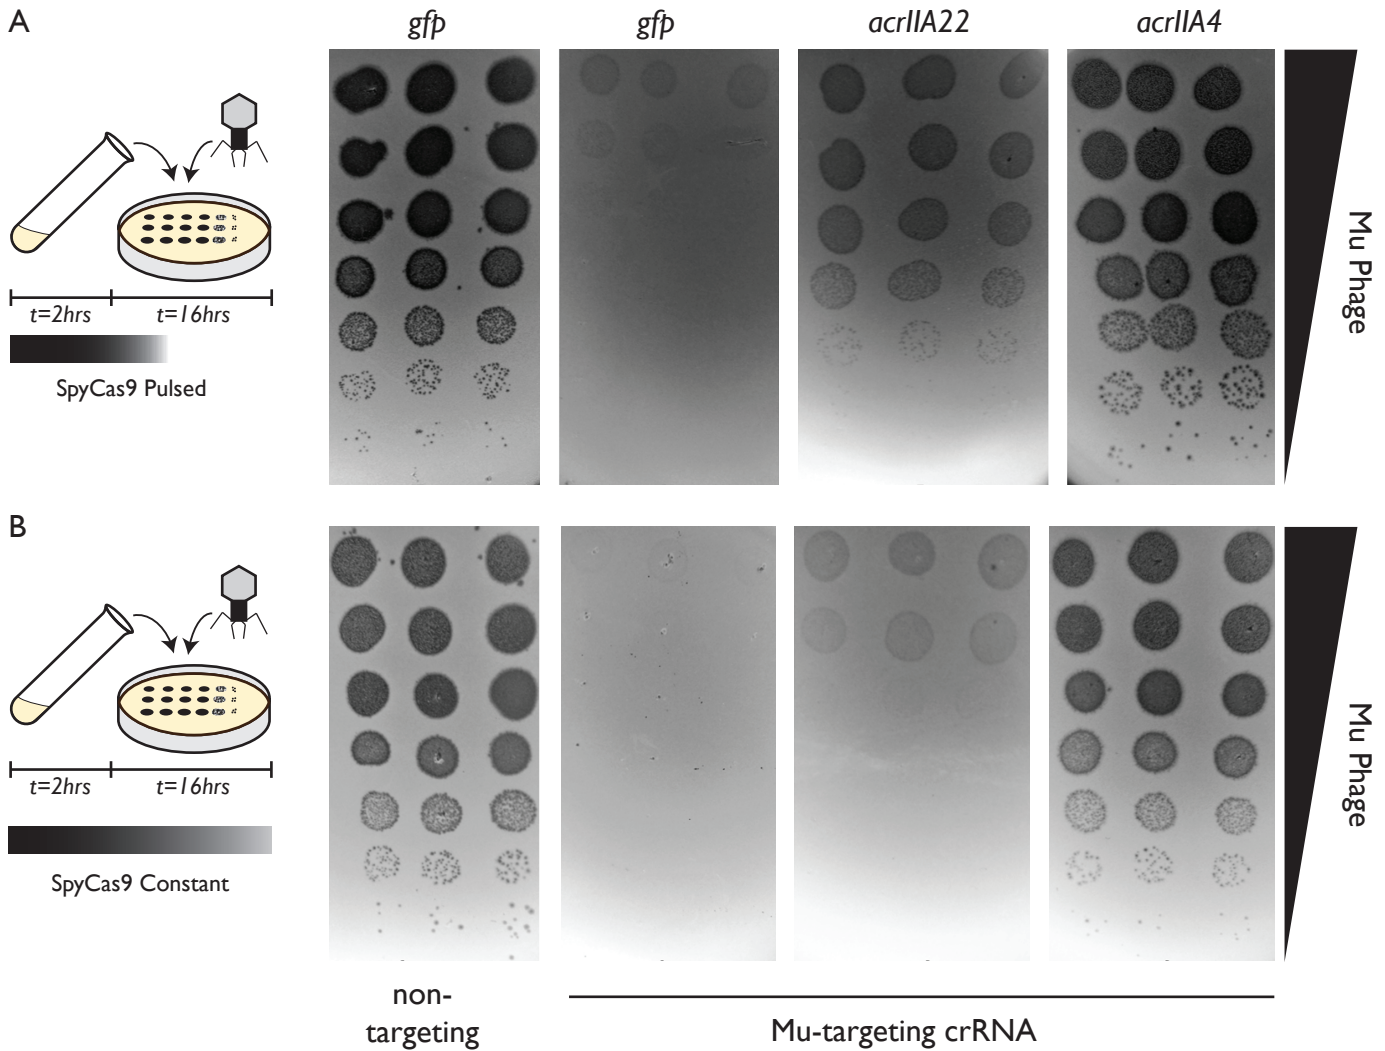

**Supplemental Figure 3.** Mu phage fitness, measured by plaquing on *E. coli*. Plaquing is measured in the presence of *gfp*, *acrIIA22*, or *acrIIA4* via serial ten-fold dilutions. Bacterial clearing (black) occurs when phage Mu overcomes SpyCas9 immunity and lyses *E. coli*. In (A) and in (B), SpyCas9 with a Mu-targeting crRNA confers substantial protection against phage Mu relative to a non-targeting (n.t.) control, in both conditions tested. These conditions are depicted at left, with the only difference being whether SpyCas9 was only expressed in liquid growth prior to phage infection (panel A) or expressed both in liquid media and in solid media throughout infection (panel B). The positive control *acrIIA4* significantly enhances Mu fitness by inhibiting SpyCas9 in all conditions. In contrast, *acrIIA22* confers milder protection against SpyCas9. The indicated *acr* gene or *gfp* control is expressed from a second plasmid, in trans.



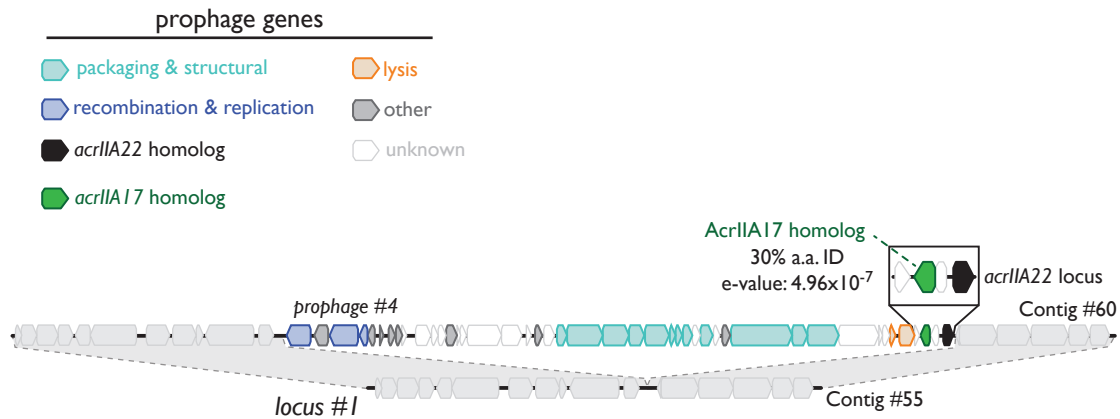

**Supplemental Figure 4.** An *acrIIA22*-encoding prophage similar to those depicted in Figure 2A. Prophage genes are colored by functional category, per the legend and as in Figure 2. This prophage encodes for a homolog of the previously described SpyCas9 inhibitor *acrIIA17* within one kilobase of an *acrIIA22* homolog. Sequence relatedness for the depicted *acrIIA17* gene and the original discovery by Mahendra *et al.* is shown. Because phages often encode multiple *acrs* in the same locus, the co-localization of *acrIIA17* with *acrIIA22* is consistent with the latter gene functioning natively to inhibit CRISPR-Cas activity. Contigs are numbered to indicate their descriptions in Supplemental Table 3, which contains their metadata, taxonomy, and sequence retrieval information. All sequences and annotations may also be found in Supplementary Datasets 1 and 2.

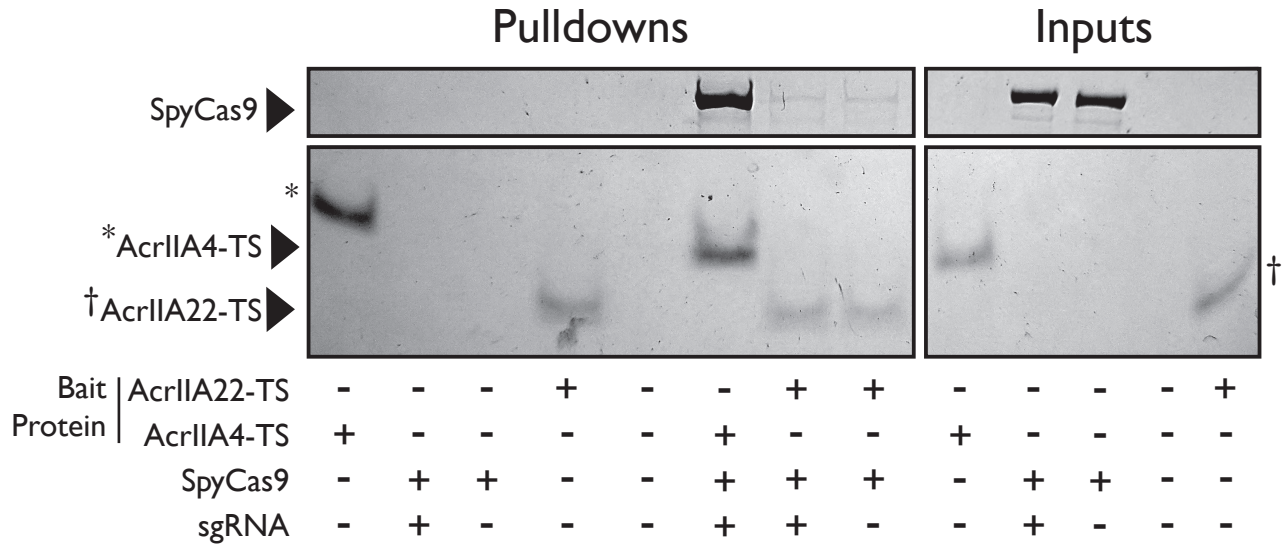

**Supplemental Figure 5.** AcrIIA22 does not strongly bind SpyCas9. SpyCas9 and sgRNA were pre-incubated before mixing with a twin-strep (TS) tagged AcrIIA22 or AcrIIA4. SpyCas9 without sgRNA was also used. (A) Streptactin pull-downs on AcrIIA4 also pulled down SpyCas9 pre-incubated with sgRNA, as previously reported. Similar pull-downs with AcrIIA22 indicate little to no interaction with SpyCas9, regardless of whether sgRNA was used. These images depict total protein content visualized by Coomassie stain. Reaction components are indicated below the gel image. Asterisks (\*) and dagger (†) symbols indicate AcrIIA4 and AcrIIA22 protein bands that run at slightly different positions than expected due to gel smiling.

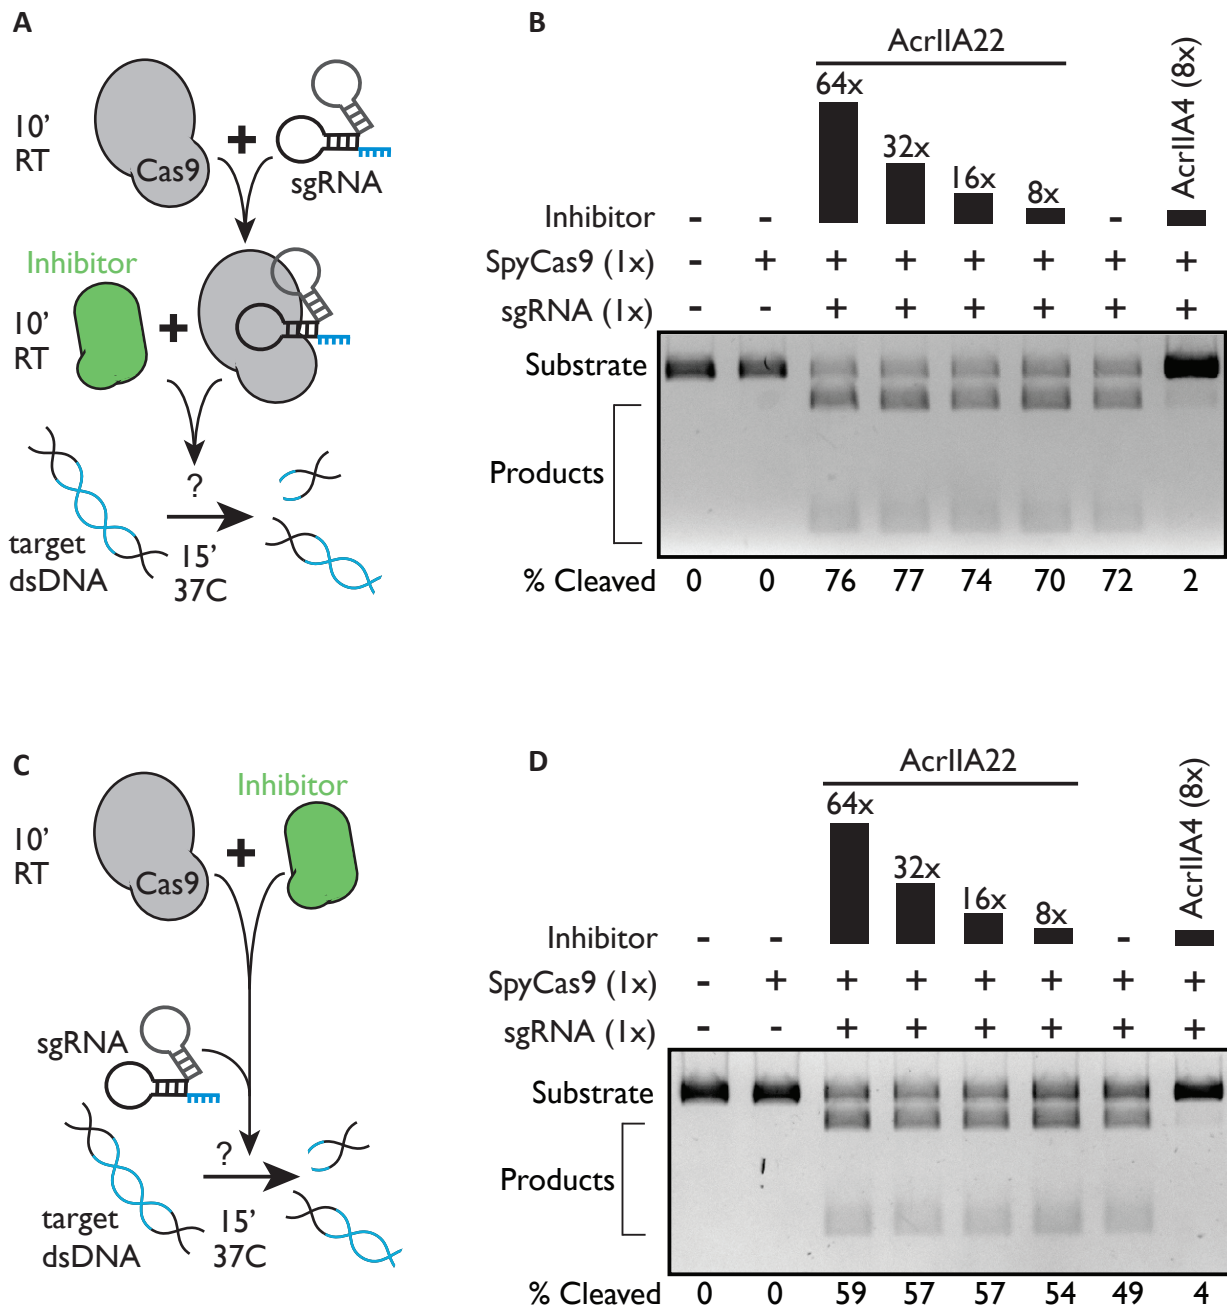

**Supplemental Figure 6.** AcrIIA22 does not inhibit SpyCas9 from cleaving linear DNA. **(A)** Cartoon depicting the experiment in **(B)**. SpyCas9 was pre-incubated with sgRNA targeting linear DNA. Then, Acrs candidates were added. Subsequently, cleavage reactions were performed, and the DNA products visualized by gel electrophoresis in panel B. **(B)** Products of the reactions described in panel A for the inhibitors AcrIIA22 and AcrIIA4. Reaction components are depicted atop the gel image, with molar equivalents relative to SpyCas9 indicated. The percent of DNA substrate cleaved by SpyCas9 is quantified below each lane. **(C)** As in panel A, except candidate Acrs were incubated with SpyCas9 before sgRNA addition. Reactions were begun via the simultaneous addition of sgRNA and linear dsDNA instead of dsDNA in isolation. **(D)** The products of the reactions described in panel C for AcrIIA22 and AcrIIA4 inhibitors. To push these Cas9 digestion reactions toward completion, ratios of Cas9:DNA were ten-fold higher than those shown in Figure 6C and reactions were allowed to progress for three times as long.

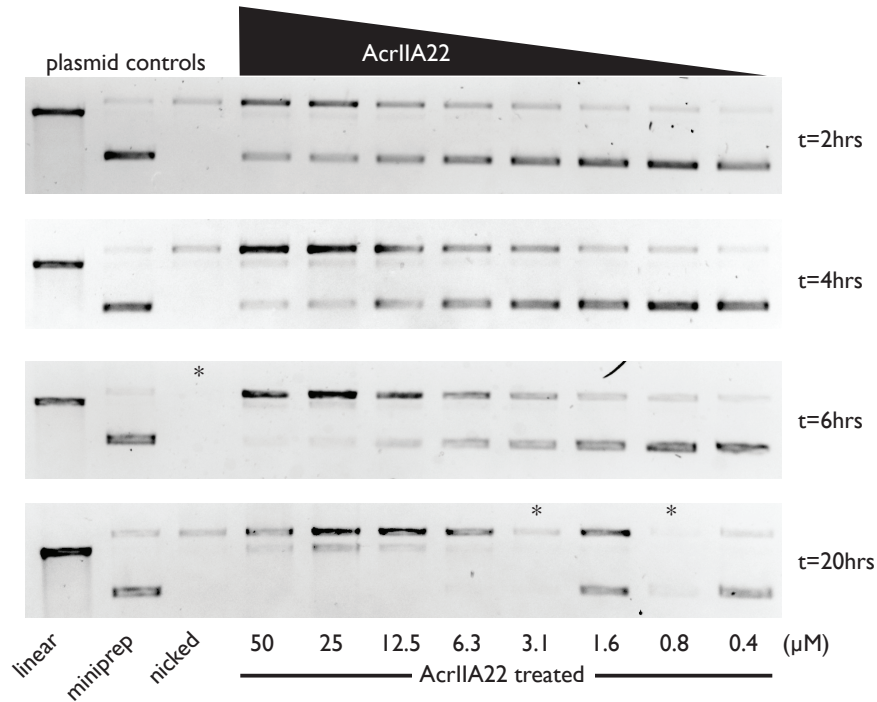

**Supplemental Figure 7.** AcrIIA22 nicks supercoiled plasmids *in vitro*. Plasmid controls are in the leftmost three lanes. Reaction times are indicated to the right of each gel. AcrIIA22 nicks supercoiled plasmids in a concentration and time dependent manner. Extended incubations at high concentrations produce a linearized product. Asterisks (\*) indicate loading errors, where less sample was loaded than other lanes.

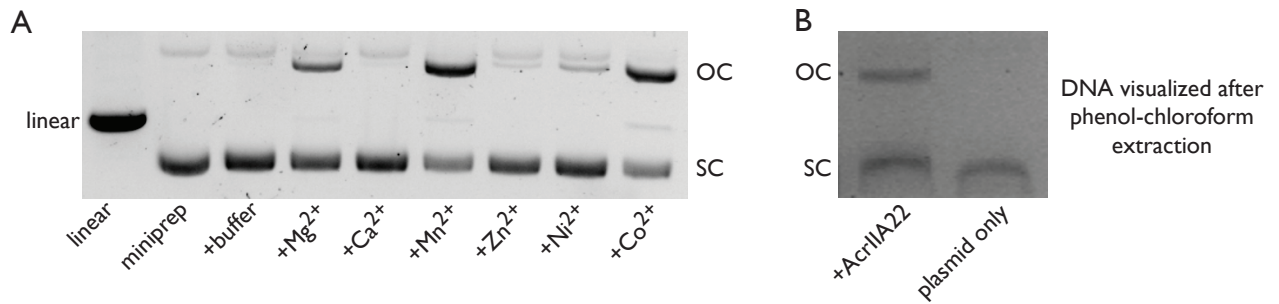

**Supplemental Figure 8.** AcrlIA22 is a nickase. **(A)** The impact of different divalent cations on AcrlIA22's nickase activity. OC, open-circle plasmid form. SC, supercoiled plasmid. **(B)** The open-circle plasmid product persists through phenol-chloroform extraction following AcrlIA22 treatment.



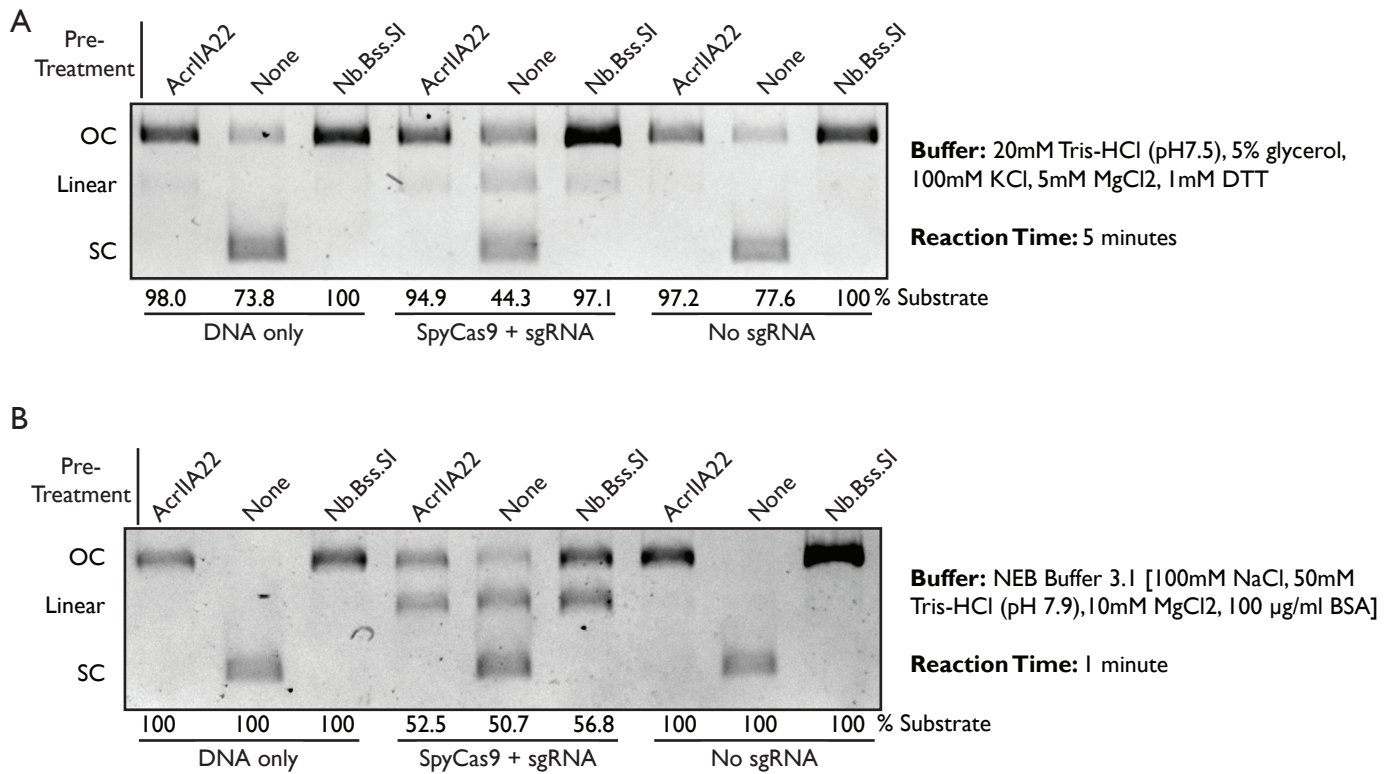

**Supplemental Figure 9.** Nicked plasmids are less susceptible to linearization via SpyCas9 cleavage. **(A)** As in Figure 6C, Plasmid purifications from overnight cultures were either left unmodified or pre-treated with one of two nickase enzymes, AcrIIA22 or Nb.Bss.SI. Linear, open-circle (OC), and supercoiled (SC) plasmid forms are indicated. The % substrate value indicates the percentage of DNA in the nicked form for AcrIIA22 or Nb.Bss.SI-treated plasmids or in the supercoiled form for the untreated miniprep. Reaction components are listed below each lane. Buffer conditions and reaction time is listed at right. **(B)** As in **(A)**, but with different reaction conditions, listed at right. In these conditions, the reaction proceeded too quickly to detect SpyCas9's substrate preference (all substrates were rapidly linearized).

**Supplemental Table 1.** Whether anti-CRISPRs are known to bind Cas proteins and inhibit their cleavage activity as purified proteins.

| <b>Acr</b>      | <b>Binds cognate Cas protein?</b> | <b>Inhibit as pure proteins?</b> | <b>References</b>                                                                    |
|-----------------|-----------------------------------|----------------------------------|--------------------------------------------------------------------------------------|
| AcrIIA1         | Yes                               | No                               | (Osuna et al., 2020)                                                                 |
| AcrIIA2         | Yes                               | Yes                              | (Jiang et al., 2019; Liu et al., 2019)                                               |
| AcrIIA3         | unknown                           | unknown                          | (Rauch et al., 2017)                                                                 |
| AcrIIA4         | Yes                               | Yes                              | (Dong et al., 2017; Shin et al., 2017; Yang and Patel, 2017)                         |
| AcrIIA5         | Yes                               | Yes                              | (An et al., 2020; Garcia et al., 2019; Song et al., 2019)                            |
| AcrIIA6         | Yes                               | Yes                              | (Fuchsbauer et al., 2019)                                                            |
| AcrIIA7         | No                                | Yes                              | (Uribe et al., 2019)                                                                 |
| AcrIIA8         | Yes                               | Yes                              | (Uribe et al., 2019)                                                                 |
| AcrIIA9         | Yes                               | Yes                              | (Uribe et al., 2019)                                                                 |
| AcrIIA10        | Yes                               | Yes                              | (Uribe et al., 2019)                                                                 |
| AcrIIA11        | Yes                               | Yes                              | (Forsberg et al., 2019)                                                              |
| AcrIIA12        | probable                          | Yes                              | (Eitzinger et al., 2020; Osuna et al., 2020)                                         |
| AcrIIA13        | unknown                           | Yes                              | (Watters et al., 2020)                                                               |
| AcrIIA14        | unknown                           | Yes                              | (Watters et al., 2020)                                                               |
| AcrIIA15        | unknown                           | Yes                              | (Watters et al., 2020)                                                               |
| AcrIIA16        | Yes                               | Yes                              | (Mahendra et al., 2020)                                                              |
| AcrIIA17        | Yes                               | No                               | (Mahendra et al., 2020)                                                              |
| AcrIIA18        | Yes                               | No                               | (Mahendra et al., 2020)                                                              |
| AcrIIA19        | Yes                               | No                               | (Mahendra et al., 2020)                                                              |
| AcrIIA20        | unknown                           | Yes                              | (Eitzinger et al., 2020)                                                             |
| AcrIIA21        | unknown                           | Yes                              | (Eitzinger et al., 2020)                                                             |
| <b>AcrIIA22</b> | <b>No</b>                         | <b>No</b>                        | <b>This study</b>                                                                    |
| AcrIIC1         | Yes                               | Yes                              | (Pawluk et al., 2016)                                                                |
| AcrIIC2         | Yes                               | Yes                              | (Pawluk et al., 2016)                                                                |
| AcrIIC3         | Yes                               | Yes                              | (Pawluk et al., 2016)                                                                |
| AcrIIC4         | Yes                               | Yes                              | (Lee et al., 2018)                                                                   |
| AcrIIC5         | Yes                               | Yes                              | (Lee et al., 2018)                                                                   |
| AcrVA1          | Yes                               | Yes                              | (Knott et al., 2019b; Watters et al., 2018; Zhang et al., 2019)                      |
| AcrVA2          | unknown                           | unknown                          | (Marino et al., 2018)                                                                |
| AcrVA3          | unknown                           | unknown                          | (Marino et al., 2018)                                                                |
| AcrVA4          | Yes                               | Yes                              | (Knott et al., 2019a; Knott et al., 2019b; Watters et al., 2018; Zhang et al., 2019) |

|              |             |         |                                                                       |
|--------------|-------------|---------|-----------------------------------------------------------------------|
| AcrVA5       | transiently | Yes     | (Knott et al., 2019b; Watters et al., 2018; Zhang et al., 2019)       |
| AcrVIA1(Lse) | Yes         | Yes     | (Meeske et al., 2020)                                                 |
| AcrVIA1(Lwa) | Yes         | unknown | (Lin et al., 2020)                                                    |
| AcrVIA2      | Yes         | unknown | (Lin et al., 2020)                                                    |
| AcrVIA3      | Yes         | unknown | (Lin et al., 2020)                                                    |
| AcrVIA4      | Yes         | unknown | (Lin et al., 2020)                                                    |
| AcrVIA5      | Yes         | unknown | (Lin et al., 2020)                                                    |
| AcrVIA6      | Yes         | unknown | (Lin et al., 2020)                                                    |
| AcrVIA7      | unknown     | unknown | (Lin et al., 2020)                                                    |
| AcrIB1       | unknown     | unknown | (Lin et al., 2020)                                                    |
| AcrIC1       | unknown     | unknown | (Leon et al., 2020)                                                   |
| AcrIC2       | probable    | unknown | (Leon et al., 2020)                                                   |
| AcrIC3       | unknown     | unknown | (Leon et al., 2020)                                                   |
| AcrIC4       | probable    | unknown | (Leon et al., 2020)                                                   |
| AcrIC5       | probable    | unknown | (Leon et al., 2020)                                                   |
| AcrIC6       | unknown     | unknown | (Leon et al., 2020)                                                   |
| AcrIC7       | probable    | unknown | (Leon et al., 2020)                                                   |
| AcrIC8       | probable    | unknown | (Leon et al., 2020)                                                   |
| AcrID1       | Yes         | unknown | (He et al., 2018)                                                     |
| AcrIE1       | Yes         | unknown | (Pawluk et al., 2017)                                                 |
| AcrIE2       | unknown     | unknown | (Pawluk et al., 2014)                                                 |
| AcrIE3       | probable    | unknown | (Stanley, 2018)                                                       |
| AcrIE4       | unknown     | unknown | (Pawluk et al., 2014)                                                 |
| AcrIE5       | unknown     | unknown | (Pawluk et al., 2014)                                                 |
| AcrIE6       | unknown     | unknown | (Pawluk et al., 2014)                                                 |
| AcrIE7       | unknown     | unknown | (Pawluk et al., 2014)                                                 |
| AcrIE4-IF7   | unknown     | unknown | (Marino et al., 2018)                                                 |
| AcrIE8       | unknown     | unknown | (Pinilla-Redondo et al., 2020)                                        |
| AcrIF1       | Yes         | unknown | (Bondy-Denomy et al., 2015; Chowdhury et al., 2017; Guo et al., 2017) |
| AcrIF2       | Yes         | unknown | (Bondy-Denomy et al., 2015; Chowdhury et al., 2017; Guo et al., 2017) |
| AcrIF3       | Yes         | unknown | (Bondy-Denomy et al., 2015; Wang et al., 2016a; Wang et al., 2016b)   |
| AcrIF4       | Yes         | unknown | (Bondy-Denomy et al., 2015)                                           |
| AcrIF5       | unknown     | unknown | (Bondy-Denomy et al., 2013)                                           |
| AcrIF6       | Yes         | Yes     | (Zhang et al., 2020)                                                  |

|          |                                    |         |                                            |
|----------|------------------------------------|---------|--------------------------------------------|
| AcrIF7   | Yes                                | unknown | (Hirschi et al., 2020)                     |
| AcrIF8   | Yes                                | Yes     | (Zhang et al., 2020)                       |
| AcrIF9   | Yes                                | Yes     | (Hirschi et al., 2020; Zhang et al., 2020) |
| AcrIF10  | Yes                                | unknown | (Guo et al., 2017)                         |
| AcrIF11  | unknown                            | unknown | (Marino et al., 2018)                      |
| AcrIF12  | unknown                            | unknown | (Marino et al., 2018)                      |
| AcrIF13  | unknown                            | unknown | (Marino et al., 2018)                      |
| AcrIF14  | unknown                            | unknown | (Marino et al., 2018)                      |
| AcrIF15  | probable                           | unknown | (Pinilla-Redondo et al., 2020)             |
| AcrIF16  | unknown                            | unknown | (Pinilla-Redondo et al., 2020)             |
| AcrIF17  | unknown                            | unknown | (Pinilla-Redondo et al., 2020)             |
| AcrIF18  | probable                           | unknown | (Pinilla-Redondo et al., 2020)             |
| AcrIF19  | unknown                            | unknown | (Pinilla-Redondo et al., 2020)             |
| AcrIF20  | unknown                            | unknown | (Pinilla-Redondo et al., 2020)             |
| AcrIF21  | unknown                            | unknown | (Pinilla-Redondo et al., 2020)             |
| AcrIF22  | unknown                            | unknown | (Pinilla-Redondo et al., 2020)             |
| AcrIF23  | unknown                            | unknown | (Pinilla-Redondo et al., 2020)             |
| AcrIF24  | unknown                            | unknown | (Pinilla-Redondo et al., 2020)             |
| AcrIII-1 | No (degrades CA4 second messenger) | No      | (Athukoralage et al., 2020)                |
| AcrIIIB1 | Yes                                | unknown | (Bhoobalan-Chitty et al., 2019)            |

**Supplemental Table 2.** PC4-like proteins with structural homology to AcrIIA22

| Structural Homolog |                                                        | Function         | Similarity to AcrIIA22 |          |         |           |
|--------------------|--------------------------------------------------------|------------------|------------------------|----------|---------|-----------|
| PDBID              | Name                                                   | DNA/RNA Binding* | Zscore                 | r.m.s.d. | n-align | % A.A. ID |
| 4bg7               | PC4 putative transcriptional coactivator p15           | DNA              | 6.2                    | 2.5      | 54      | 15        |
| 3k44               | D. melanogaster Pur- $\alpha$                          | DNA/RNA          | 5.9                    | 2.6      | 47      | 9         |
| 5fgp               | Pur- $\alpha$ repeat I and II from D. melanogaster     | DNA/RNA          | 5.6                    | 2.1      | 48      | 8         |
| 3n8b               | Pur- $\alpha$ from B. burgdorferi                      | DNA/RNA          | 5                      | 2.8      | 48      | 6         |
| 2gje               | Mitochondrial RNA Binding Protein (Trypanosoma brucei) | RNA              | 4.9                    | 2.5      | 52      | 8         |
| 5zkl               | Protein of unknown function SP_0782, S. pneumoniae     | DNA              | 4.7                    | 3.6      | 52      | 12        |
| 5fgo               | D. melanogaster Pur- $\alpha$ repeat III               | No info          | 4.5                    | 2.7      | 44      | 14        |
| 1pcf               | Replication & transcription cofactor PC4 CTD           | DNA              | 4.5                    | 2.5      | 45      | 7         |
| 2ltt               | Putative Uncharacterized Protein YDBC                  | DNA              | 4.5                    | 2.8      | 50      | 12        |
| 4bhm               | MoSub1-DNA PC4 transcription cofactor                  | DNA              | 3.9                    | 2.8      | 45      | 4         |
| 3cm1               | SSGA-like sporulation specific cell division protein   | No info          | 2.8                    | 3.7      | 47      | 13        |
| 1l3a               | Transcription factor PBF-2 (P24, WHY1)                 | DNA              | 2.8                    | 5        | 48      | 8         |
| 4ntq               | Anti-toxin CdiI, E. cloacae                            | No info          | 2.7                    | 3        | 49      | 12        |
| 3n1k               | WHY2 transcription factor, S. tuberosum                | DNA              | 2.6                    | 2.8      | 52      | 4         |

\*RNA/DNA binding data from (Janowski and Niessing, 2020).



**Supplemental Table 3.** All sequences used in this study. Sequence names and databases are indicated. All sequences and annotations are also available as supplemental data. Sequences retrieved from Pasolli *et al.* refer to the following study: (Pasolli *et al.*, 2019).

| Contig No. | Sequence Name                                                        | How Used?                                                                    | NCBI Nuc. ID | Pasolli et al SGB? | Pasolli et al Raw Assembly? | Pasolli Reconstructed Genome Name | SGB id | GTDB Taxonomy                                                                                                 | External Data Available at:                                                                                                   |
|------------|----------------------------------------------------------------------|------------------------------------------------------------------------------|--------------|--------------------|-----------------------------|-----------------------------------|--------|---------------------------------------------------------------------------------------------------------------|-------------------------------------------------------------------------------------------------------------------------------|
| 1          | 4303_LiJ_2014__V1.UC63-0__bin.67_NODE_112_length_95405_cov_4.60675   | Figures 2, find gene functions from 54 unique genomic loci; Figure 3 Acr Seq | n/a          | Yes                | No                          | LiJ_2014__V1.UC63-0__bin.67       | 4303   | d__Bacteria; p__Firmicutes_A; c__Clostridia; o__Oscillospirales; f__Acutalibacteraceae; g__CAG-217            | <a href="http://segatalab.cibio.unitn.it/data/Pasolli_et_al.html">http://segatalab.cibio.unitn.it/data/Pasolli_et_al.html</a> |
| 2          | Bengtsson-PalmeJ_2015__TRAVELRE S9_NODE_4_length_53858_0_cov_9.43148 | find gene functions from 54 unique genomic loci                              | n/a          | No                 | Yes                         | n/a                               | n/a    | d__Bacteria; p__Firmicutes_A; c__Clostridia; o__Oscillospirales; f__Acutalibacteraceae; g__CAG-217 (inferred) | <a href="http://segatalab.cibio.unitn.it/data/Pasolli_et_al.html">http://segatalab.cibio.unitn.it/data/Pasolli_et_al.html</a> |
| 3          | ChengpingW_2017__AS9raw_NODE_922_length_2766_4_cov_3.49089           | find gene functions from 54 unique genomic loci                              | n/a          | No                 | Yes                         | n/a                               | n/a    | d__Bacteria; p__Firmicutes_A; c__Clostridia; o__Oscillospirales; f__Acutalibacteraceae; g__CAG-217 (inferred) | <a href="http://segatalab.cibio.unitn.it/data/Pasolli_et_al.html">http://segatalab.cibio.unitn.it/data/Pasolli_et_al.html</a> |
| 4          | CosteaPI_2017__SID713B025-11-0-0_NODE_4_length_351620_cov_7.46108    | find gene functions from 54 unique genomic loci                              | n/a          | No                 | Yes                         | n/a                               | n/a    | d__Bacteria; p__Firmicutes_A; c__Clostridia; o__Oscillospirales; f__Acutalibacteraceae; g__CAG-217 (inferred) | <a href="http://segatalab.cibio.unitn.it/data/Pasolli_et_al.html">http://segatalab.cibio.unitn.it/data/Pasolli_et_al.html</a> |
| 5          | Britoll_2016__M1.64.ST_NODE_47_length_140472_cov_9.49805             | find gene functions from 54 unique genomic loci; Figure 3 Acr Seq            | n/a          | No                 | Yes                         | n/a                               | n/a    | d__Bacteria; p__Firmicutes_A; c__Clostridia; o__Oscillospirales; f__Acutalibacteraceae; g__CAG-217 (inferred) | <a href="http://segatalab.cibio.unitn.it/data/Pasolli_et_al.html">http://segatalab.cibio.unitn.it/data/Pasolli_et_al.html</a> |
| 6          | Britoll_2016__M2.57.ST_NODE_3_length_405636_cov_14.0428              | find gene functions from 54 unique genomic loci                              | n/a          | No                 | Yes                         | n/a                               | n/a    | d__Bacteria; p__Firmicutes_A; c__Clostridia; o__Oscillospirales; f__Acutalibacteraceae; g__CAG-217 (inferred) | <a href="http://segatalab.cibio.unitn.it/data/Pasolli_et_al.html">http://segatalab.cibio.unitn.it/data/Pasolli_et_al.html</a> |
| 7          | Britoll_2016__WL.14.ST_NODE_13_length_259523_cov_10.8408             | find gene functions from 54 unique genomic loci                              | n/a          | No                 | Yes                         | n/a                               | n/a    | d__Bacteria; p__Firmicutes_A; c__Clostridia; o__Oscillospirales; f__Acutalibacteraceae; g__CAG-217 (inferred) | <a href="http://segatalab.cibio.unitn.it/data/Pasolli_et_al.html">http://segatalab.cibio.unitn.it/data/Pasolli_et_al.html</a> |
| 8          | ChengpingW_2017__AS67raw_NODE_2_length_43917_7_cov_9.00174           | Figure 2, find gene functions from 54 unique genomic loci; Figure 3 Acr Seq  | n/a          | No                 | Yes                         | n/a                               | n/a    | d__Bacteria; p__Firmicutes_A; c__Clostridia; o__Oscillospirales; f__Acutalibacteraceae; g__CAG-217 (inferred) | <a href="http://segatalab.cibio.unitn.it/data/Pasolli_et_al.html">http://segatalab.cibio.unitn.it/data/Pasolli_et_al.html</a> |
| 9          | CM_madagascar_A90_04_1FE_NODE_125_length_81453_cov_9.00904           | find gene functions from 54 unique genomic loci                              | n/a          | No                 | Yes                         | n/a                               | n/a    | d__Bacteria; p__Firmicutes_A; c__Clostridia; o__Oscillospirales; f__Acutalibacteraceae; g__CAG-217 (inferred) | <a href="http://segatalab.cibio.unitn.it/data/Pasolli_et_al.html">http://segatalab.cibio.unitn.it/data/Pasolli_et_al.html</a> |
| 10         | CM_madagascar_V12_01_2FE_NODE_5_length_202628_cov_9.50435            | find gene functions from 54 unique genomic loci                              | n/a          | No                 | Yes                         | n/a                               | n/a    | d__Bacteria; p__Firmicutes_A; c__Clostridia; o__Oscillospirales; f__Acutalibacteraceae; g__CAG-217 (inferred) | <a href="http://segatalab.cibio.unitn.it/data/Pasolli_et_al.html">http://segatalab.cibio.unitn.it/data/Pasolli_et_al.html</a> |
| 11         | CosteaPI_2017__SID713A046-11-0-0_NODE_322_length_6900_0_cov_4.32987  | find gene functions from 54 unique genomic loci; Figure 3 Acr Seq            | n/a          | No                 | Yes                         | n/a                               | n/a    | d__Bacteria; p__Firmicutes_A; c__Clostridia; o__Oscillospirales; f__Acutalibacteraceae; g__CAG-217 (inferred) | <a href="http://segatalab.cibio.unitn.it/data/Pasolli_et_al.html">http://segatalab.cibio.unitn.it/data/Pasolli_et_al.html</a> |
| 12         | CosteaPI_2017__SID713A045-11-0-0_NODE_78_length_64886_cov_3.97493    | find gene functions from 54 unique genomic loci                              | n/a          | No                 | Yes                         | n/a                               | n/a    | d__Bacteria; p__Firmicutes_A; c__Clostridia; o__Oscillospirales; f__Acutalibacteraceae; g__CAG-217 (inferred) | <a href="http://segatalab.cibio.unitn.it/data/Pasolli_et_al.html">http://segatalab.cibio.unitn.it/data/Pasolli_et_al.html</a> |
| 13         | CosteaPI_2017__SID713A004-11-0-0_NODE_1_length_647860_cov_14.1013    | find gene functions from 54 unique genomic loci; Figure 3 Acr Seq            | n/a          | No                 | Yes                         | n/a                               | n/a    | d__Bacteria; p__Firmicutes_A; c__Clostridia; o__Oscillospirales; f__Acutalibacteraceae; g__CAG-217 (inferred) | <a href="http://segatalab.cibio.unitn.it/data/Pasolli_et_al.html">http://segatalab.cibio.unitn.it/data/Pasolli_et_al.html</a> |
| 14         | CosteaPI_2017__peacemaker-11-60-                                     | find gene functions from 54 unique genomic loci                              | n/a          | No                 | Yes                         | n/a                               | n/a    | d__Bacteria; p__Firmicutes_A; c__Clostridia; o__Oscillospirales; f__Acutalibacteraceae; g__CAG-217 (inferred) | <a href="http://segatalab.cibio.unitn.it/data/Pasolli_et_al.html">http://segatalab.cibio.unitn.it/data/Pasolli_et_al.html</a> |

|    |                                                                      |                                                                   |     |    |     |     |     |                                                                                                         |                                                                                                                               |
|----|----------------------------------------------------------------------|-------------------------------------------------------------------|-----|----|-----|-----|-----|---------------------------------------------------------------------------------------------------------|-------------------------------------------------------------------------------------------------------------------------------|
|    | 0_NODE_48_length_49378_cov_15.5445                                   |                                                                   |     |    |     |     |     |                                                                                                         |                                                                                                                               |
| 15 | CosteaPI_2017__SID713A0_63-11-0-0_NODE_2082_length_16960_cov_2.98527 | find gene functions from 54 unique genomic loci                   | n/a | No | Yes | n/a | n/a | d_Bacteria; p_Firmicutes_A; c_Clostridia; o_Oscillospirales; f_Acutalibacteraceae; g_CAG-217 (inferred) | <a href="http://segatalab.cibio.unitn.it/data/Pasolli_et_al.html">http://segatalab.cibio.unitn.it/data/Pasolli_et_al.html</a> |
| 16 | CosteaPI_2017__SID713A0_88-11-0-0_NODE_89_length_113297_cov_5.77445  | find gene functions from 54 unique genomic loci; Figure 3 Acr Seq | n/a | No | Yes | n/a | n/a | d_Bacteria; p_Firmicutes_A; c_Clostridia; o_Oscillospirales; f_Acutalibacteraceae; g_CAG-217 (inferred) | <a href="http://segatalab.cibio.unitn.it/data/Pasolli_et_al.html">http://segatalab.cibio.unitn.it/data/Pasolli_et_al.html</a> |
| 17 | CosteaPI_2017__SID713A0_62-11-0-0_NODE_38_length_192196_cov_4.03099  | Figure 2, find gene functions from 54 unique genomic loci         | n/a | No | Yes | n/a | n/a | d_Bacteria; p_Firmicutes_A; c_Clostridia; o_Oscillospirales; f_Acutalibacteraceae; g_CAG-217 (inferred) | <a href="http://segatalab.cibio.unitn.it/data/Pasolli_et_al.html">http://segatalab.cibio.unitn.it/data/Pasolli_et_al.html</a> |
| 18 | CosteaPI_2017__SID713B0_51-11-0-0_NODE_14_length_298619_cov_7.20988  | find gene functions from 54 unique genomic loci                   | n/a | No | Yes | n/a | n/a | d_Bacteria; p_Firmicutes_A; c_Clostridia; o_Oscillospirales; f_Acutalibacteraceae; g_CAG-217 (inferred) | <a href="http://segatalab.cibio.unitn.it/data/Pasolli_et_al.html">http://segatalab.cibio.unitn.it/data/Pasolli_et_al.html</a> |
| 19 | FengQ_2015__SID31872_NODE_2_length_392843_cov_5.93617                | find gene functions from 54 unique genomic loci                   | n/a | No | Yes | n/a | n/a | d_Bacteria; p_Firmicutes_A; c_Clostridia; o_Oscillospirales; f_Acutalibacteraceae; g_CAG-217 (inferred) | <a href="http://segatalab.cibio.unitn.it/data/Pasolli_et_al.html">http://segatalab.cibio.unitn.it/data/Pasolli_et_al.html</a> |
| 20 | FengQ_2015__SID530258_NODE_5_length_350476_cov_17.595                | find gene functions from 54 unique genomic loci; Figure 3 Acr Seq | n/a | No | Yes | n/a | n/a | d_Bacteria; p_Firmicutes_A; c_Clostridia; o_Oscillospirales; f_Acutalibacteraceae; g_CAG-217 (inferred) | <a href="http://segatalab.cibio.unitn.it/data/Pasolli_et_al.html">http://segatalab.cibio.unitn.it/data/Pasolli_et_al.html</a> |
| 21 | FengQ_2015__SID530373_NODE_21_length_272157_cov_9.73468              | find gene functions from 54 unique genomic loci                   | n/a | No | Yes | n/a | n/a | d_Bacteria; p_Firmicutes_A; c_Clostridia; o_Oscillospirales; f_Acutalibacteraceae; g_CAG-217 (inferred) | <a href="http://segatalab.cibio.unitn.it/data/Pasolli_et_al.html">http://segatalab.cibio.unitn.it/data/Pasolli_et_al.html</a> |
| 22 | HeQ_2017__SZAXPI029561-52_NODE_1_length_502752_cov_8.09488           | find gene functions from 54 unique genomic loci; Figure 3 Acr Seq | n/a | No | Yes | n/a | n/a | d_Bacteria; p_Firmicutes_A; c_Clostridia; o_Oscillospirales; f_Acutalibacteraceae; g_CAG-217 (inferred) | <a href="http://segatalab.cibio.unitn.it/data/Pasolli_et_al.html">http://segatalab.cibio.unitn.it/data/Pasolli_et_al.html</a> |
| 23 | HeQ_2017__SZAXPI029575-90_NODE_229_length_94918_cov_3.79903          | find gene functions from 54 unique genomic loci                   | n/a | No | Yes | n/a | n/a | d_Bacteria; p_Firmicutes_A; c_Clostridia; o_Oscillospirales; f_Acutalibacteraceae; g_CAG-217 (inferred) | <a href="http://segatalab.cibio.unitn.it/data/Pasolli_et_al.html">http://segatalab.cibio.unitn.it/data/Pasolli_et_al.html</a> |
| 24 | KarlssonFH_2013__S463_NODE_1_length_570037_cov_16.3973               | Figure 2, find gene functions from 54 unique genomic loci         | n/a | No | Yes | n/a | n/a | d_Bacteria; p_Firmicutes_A; c_Clostridia; o_Oscillospirales; f_Acutalibacteraceae; g_CAG-217 (inferred) | <a href="http://segatalab.cibio.unitn.it/data/Pasolli_et_al.html">http://segatalab.cibio.unitn.it/data/Pasolli_et_al.html</a> |
| 25 | Lij_2014__O2.UC12-1_NODE_323_length_49995_cov_5.04395                | find gene functions from 54 unique genomic loci                   | n/a | No | Yes | n/a | n/a | d_Bacteria; p_Firmicutes_A; c_Clostridia; o_Oscillospirales; f_Acutalibacteraceae; g_CAG-217 (inferred) | <a href="http://segatalab.cibio.unitn.it/data/Pasolli_et_al.html">http://segatalab.cibio.unitn.it/data/Pasolli_et_al.html</a> |
| 26 | Lij_2014__V1.FI02_NODE_274_length_84286_cov_3.49253                  | find gene functions from 54 unique genomic loci                   | n/a | No | Yes | n/a | n/a | d_Bacteria; p_Firmicutes_A; c_Clostridia; o_Oscillospirales; f_Acutalibacteraceae; g_CAG-217 (inferred) | <a href="http://segatalab.cibio.unitn.it/data/Pasolli_et_al.html">http://segatalab.cibio.unitn.it/data/Pasolli_et_al.html</a> |
| 27 | Lij_2017__H1M413815_NODE_71_length_81514_cov_18.301                  | find gene functions from 54 unique genomic loci                   | n/a | No | Yes | n/a | n/a | d_Bacteria; p_Firmicutes_A; c_Clostridia; o_Oscillospirales; f_Acutalibacteraceae; g_CAG-217 (inferred) | <a href="http://segatalab.cibio.unitn.it/data/Pasolli_et_al.html">http://segatalab.cibio.unitn.it/data/Pasolli_et_al.html</a> |
| 28 | Lij_2017__H2M514909_NODE_68_length_69076_cov_10.283                  | find gene functions from 54 unique genomic loci                   | n/a | No | Yes | n/a | n/a | d_Bacteria; p_Firmicutes_A; c_Clostridia; o_Oscillospirales; f_Acutalibacteraceae; g_CAG-217 (inferred) | <a href="http://segatalab.cibio.unitn.it/data/Pasolli_et_al.html">http://segatalab.cibio.unitn.it/data/Pasolli_et_al.html</a> |
| 29 | LiuW_2016__SRR3992969_NODE_1149_length_18999_cov_8.45033             | find gene functions from 54 unique genomic loci; Figure 3 Acr Seq | n/a | No | Yes | n/a | n/a | d_Bacteria; p_Firmicutes_A; c_Clostridia; o_Oscillospirales; f_Acutalibacteraceae; g_CAG-217 (inferred) | <a href="http://segatalab.cibio.unitn.it/data/Pasolli_et_al.html">http://segatalab.cibio.unitn.it/data/Pasolli_et_al.html</a> |

|    |                                                              |                                                                                                                   |     |    |     |     |     |                                                                                                         |                                                                                                                               |
|----|--------------------------------------------------------------|-------------------------------------------------------------------------------------------------------------------|-----|----|-----|-----|-----|---------------------------------------------------------------------------------------------------------|-------------------------------------------------------------------------------------------------------------------------------|
| 30 | LiuW_2016__SRR3992984__NODE_127_length_61384_cov_18.0593     | find gene functions from 54 unique genomic loci                                                                   | n/a | No | Yes | n/a | n/a | d_Bacteria; p_Firmicutes_A; c_Clostridia; o_Oscillospirales; f_Acutalibacteraceae; g_CAG-217 (inferred) | <a href="http://segatalab.cibio.unitn.it/data/Pasolli_et_al.html">http://segatalab.cibio.unitn.it/data/Pasolli_et_al.html</a> |
| 31 | LiuW_2016__SRR3993014__NODE_8_length_143441_cov_89.3981      | find gene functions from 54 unique genomic loci                                                                   | n/a | No | Yes | n/a | n/a | d_Bacteria; p_Firmicutes_A; c_Clostridia; o_Oscillospirales; f_Acutalibacteraceae; g_CAG-217 (inferred) | <a href="http://segatalab.cibio.unitn.it/data/Pasolli_et_al.html">http://segatalab.cibio.unitn.it/data/Pasolli_et_al.html</a> |
| 32 | QinJ_2012__NOM001_NO DE_179_length_28679_cov_2.87521         | find gene functions from 54 unique genomic loci                                                                   | n/a | No | Yes | n/a | n/a | d_Bacteria; p_Firmicutes_A; c_Clostridia; o_Oscillospirales; f_Acutalibacteraceae; g_CAG-217 (inferred) | <a href="http://segatalab.cibio.unitn.it/data/Pasolli_et_al.html">http://segatalab.cibio.unitn.it/data/Pasolli_et_al.html</a> |
| 33 | QinJ_2012__T2D-050_NODE_25_length_192521_cov_10.1129         | find gene functions from 54 unique genomic loci                                                                   | n/a | No | Yes | n/a | n/a | d_Bacteria; p_Firmicutes_A; c_Clostridia; o_Oscillospirales; f_Acutalibacteraceae; g_CAG-217 (inferred) | <a href="http://segatalab.cibio.unitn.it/data/Pasolli_et_al.html">http://segatalab.cibio.unitn.it/data/Pasolli_et_al.html</a> |
| 34 | VatanenT_2016__G78791__NODE_43_length_22491_cov_6.98654      | find gene functions from 54 unique genomic loci                                                                   | n/a | No | Yes | n/a | n/a | d_Bacteria; p_Firmicutes_A; c_Clostridia; o_Oscillospirales; f_Acutalibacteraceae; g_CAG-217 (inferred) | <a href="http://segatalab.cibio.unitn.it/data/Pasolli_et_al.html">http://segatalab.cibio.unitn.it/data/Pasolli_et_al.html</a> |
| 35 | XieH_2016__YSZC12003_35392_NODE_87_length_196476_cov_13.3023 | find gene functions from 54 unique genomic loci                                                                   | n/a | No | Yes | n/a | n/a | d_Bacteria; p_Firmicutes_A; c_Clostridia; o_Oscillospirales; f_Acutalibacteraceae; g_CAG-217 (inferred) | <a href="http://segatalab.cibio.unitn.it/data/Pasolli_et_al.html">http://segatalab.cibio.unitn.it/data/Pasolli_et_al.html</a> |
| 36 | XieH_2016__YSZC12003_35563_NODE_11_length_353850_cov_18.1068 | Figure 2, find gene functions from 54 unique genomic loci                                                         | n/a | No | Yes | n/a | n/a | d_Bacteria; p_Firmicutes_A; c_Clostridia; o_Oscillospirales; f_Acutalibacteraceae; g_CAG-217 (inferred) | <a href="http://segatalab.cibio.unitn.it/data/Pasolli_et_al.html">http://segatalab.cibio.unitn.it/data/Pasolli_et_al.html</a> |
| 37 | XieH_2016__YSZC12003_36005_NODE_238_length_99923_cov_5.91259 | Figure 2, find gene functions from 54 unique genomic loci, source of orf1-encoding phage genome; Figure 3 Acr Seq | n/a | No | Yes | n/a | n/a | d_Bacteria; p_Firmicutes_A; c_Clostridia; o_Oscillospirales; f_Acutalibacteraceae; g_CAG-217 (inferred) | <a href="http://segatalab.cibio.unitn.it/data/Pasolli_et_al.html">http://segatalab.cibio.unitn.it/data/Pasolli_et_al.html</a> |
| 38 | XieH_2016__YSZC12003_36794_NODE_1_length_781521_cov_10.2961  | find gene functions from 54 unique genomic loci, source of orf1-encoding phage genome; Figure 3 Acr Seq           | n/a | No | Yes | n/a | n/a | d_Bacteria; p_Firmicutes_A; c_Clostridia; o_Oscillospirales; f_Acutalibacteraceae; g_CAG-217 (inferred) | <a href="http://segatalab.cibio.unitn.it/data/Pasolli_et_al.html">http://segatalab.cibio.unitn.it/data/Pasolli_et_al.html</a> |
| 39 | XieH_2016__YSZC12003_37133_NODE_3_length_676817_cov_24.9073  | find gene functions from 54 unique genomic loci                                                                   | n/a | No | Yes | n/a | n/a | d_Bacteria; p_Firmicutes_A; c_Clostridia; o_Oscillospirales; f_Acutalibacteraceae; g_CAG-217 (inferred) | <a href="http://segatalab.cibio.unitn.it/data/Pasolli_et_al.html">http://segatalab.cibio.unitn.it/data/Pasolli_et_al.html</a> |
| 40 | XieH_2016__YSZC12003_37322_NODE_5_length_601737_cov_115.712  | find gene functions from 54 unique genomic loci                                                                   | n/a | No | Yes | n/a | n/a | d_Bacteria; p_Firmicutes_A; c_Clostridia; o_Oscillospirales; f_Acutalibacteraceae; g_CAG-217 (inferred) | <a href="http://segatalab.cibio.unitn.it/data/Pasolli_et_al.html">http://segatalab.cibio.unitn.it/data/Pasolli_et_al.html</a> |
| 41 | XieH_2016__YSZC12003_37399_NODE_3_length_598430_cov_49.9887  | find gene functions from 54 unique genomic loci                                                                   | n/a | No | Yes | n/a | n/a | d_Bacteria; p_Firmicutes_A; c_Clostridia; o_Oscillospirales; f_Acutalibacteraceae; g_CAG-217 (inferred) | <a href="http://segatalab.cibio.unitn.it/data/Pasolli_et_al.html">http://segatalab.cibio.unitn.it/data/Pasolli_et_al.html</a> |
| 42 | XieH_2016__YSZC12003_37878_NODE_8_length_402183_cov_76.149   | find gene functions from 54 unique genomic loci                                                                   | n/a | No | Yes | n/a | n/a | d_Bacteria; p_Firmicutes_A; c_Clostridia; o_Oscillospirales; f_Acutalibacteraceae; g_CAG-217 (inferred) | <a href="http://segatalab.cibio.unitn.it/data/Pasolli_et_al.html">http://segatalab.cibio.unitn.it/data/Pasolli_et_al.html</a> |
| 43 | YuJ_2015__SZAXPI003435_11_NODE_1_length_772218_cov_11.5924   | find gene functions from 54 unique genomic loci                                                                   | n/a | No | Yes | n/a | n/a | d_Bacteria; p_Firmicutes_A; c_Clostridia; o_Oscillospirales; f_Acutalibacteraceae; g_CAG-217 (inferred) | <a href="http://segatalab.cibio.unitn.it/data/Pasolli_et_al.html">http://segatalab.cibio.unitn.it/data/Pasolli_et_al.html</a> |
| 44 | YuJ_2015__SZAXPI015230_16_NODE_32_length_174349_cov_17.3543  | find gene functions from 54 unique genomic loci                                                                   | n/a | No | Yes | n/a | n/a | d_Bacteria; p_Firmicutes_A; c_Clostridia; o_Oscillospirales; f_Acutalibacteraceae; g_CAG-217 (inferred) | <a href="http://segatalab.cibio.unitn.it/data/Pasolli_et_al.html">http://segatalab.cibio.unitn.it/data/Pasolli_et_al.html</a> |
| 45 | ZeeviD_2015__PNP_DietIntervention_11_NODE_16_le              | find gene functions from 54 unique genomic loci                                                                   | n/a | No | Yes | n/a | n/a | d_Bacteria; p_Firmicutes_A; c_Clostridia; o_Oscillospirales; f_Acutalibacteraceae; g_CAG-217 (inferred) | <a href="http://segatalab.cibio.unitn.it/data/Pasolli_et_al.html">http://segatalab.cibio.unitn.it/data/Pasolli_et_al.html</a> |

|    |                                                                                |                                                                                                         |               |     |     |                                         |      |                                                                                                         |                                                                                                                               |
|----|--------------------------------------------------------------------------------|---------------------------------------------------------------------------------------------------------|---------------|-----|-----|-----------------------------------------|------|---------------------------------------------------------------------------------------------------------|-------------------------------------------------------------------------------------------------------------------------------|
|    | ngth_97163_cov_10.0000_I<br>D_22997                                            |                                                                                                         |               |     |     |                                         |      |                                                                                                         |                                                                                                                               |
| 46 | ZeeviD_2015_PNP_Main_234_NODE_10_length_20229_cov_13.9987_ID_180729            | find gene functions from 54 unique genomic loci                                                         | n/a           | No  | Yes | n/a                                     | n/a  | d_Bacteria; p_Firmicutes_A; c_Clostridia; o_Oscillospirales; f_Acutalibacteraceae; g_CAG-217 (inferred) | <a href="http://segatalab.cibio.unitn.it/data/Pasolli_et_al.html">http://segatalab.cibio.unitn.it/data/Pasolli_et_al.html</a> |
| 47 | ZeeviD_2015_PNP_Main_294_NODE_20_length_208110_cov_20.9981_ID_106095           | find gene functions from 54 unique genomic loci                                                         | n/a           | No  | Yes | n/a                                     | n/a  | d_Bacteria; p_Firmicutes_A; c_Clostridia; o_Oscillospirales; f_Acutalibacteraceae; g_CAG-217 (inferred) | <a href="http://segatalab.cibio.unitn.it/data/Pasolli_et_al.html">http://segatalab.cibio.unitn.it/data/Pasolli_et_al.html</a> |
| 48 | ZeeviD_2015_PNP_Main_390_NODE_33_length_137723_cov_10.9985_ID_46475            | find gene functions from 54 unique genomic loci                                                         | n/a           | No  | Yes | n/a                                     | n/a  | d_Bacteria; p_Firmicutes_A; c_Clostridia; o_Oscillospirales; f_Acutalibacteraceae; g_CAG-217 (inferred) | <a href="http://segatalab.cibio.unitn.it/data/Pasolli_et_al.html">http://segatalab.cibio.unitn.it/data/Pasolli_et_al.html</a> |
| 49 | ZeeviD_2015_PNP_Main_578_NODE_20_length_138741_cov_8.9988_ID_132563            | find gene functions from 54 unique genomic loci                                                         | n/a           | No  | Yes | n/a                                     | n/a  | d_Bacteria; p_Firmicutes_A; c_Clostridia; o_Oscillospirales; f_Acutalibacteraceae; g_CAG-217 (inferred) | <a href="http://segatalab.cibio.unitn.it/data/Pasolli_et_al.html">http://segatalab.cibio.unitn.it/data/Pasolli_et_al.html</a> |
| 50 | ZeeviD_2015_PNP_Main_741_NODE_13_length_214417_cov_12.0572_ID_91679            | find gene functions from 54 unique genomic loci                                                         | n/a           | No  | Yes | n/a                                     | n/a  | d_Bacteria; p_Firmicutes_A; c_Clostridia; o_Oscillospirales; f_Acutalibacteraceae; g_CAG-217 (inferred) | <a href="http://segatalab.cibio.unitn.it/data/Pasolli_et_al.html">http://segatalab.cibio.unitn.it/data/Pasolli_et_al.html</a> |
| 51 | ZellerG_2014_CCIS03857607ST-4-0_NODE_542_length_35291_cov_2.7674               | find gene functions from 54 unique genomic loci                                                         | n/a           | No  | Yes | n/a                                     | n/a  | d_Bacteria; p_Firmicutes_A; c_Clostridia; o_Oscillospirales; f_Acutalibacteraceae; g_CAG-217 (inferred) | <a href="http://segatalab.cibio.unitn.it/data/Pasolli_et_al.html">http://segatalab.cibio.unitn.it/data/Pasolli_et_al.html</a> |
| 52 | ZellerG_2014_CCIS22958137ST-20-0_NODE_40_length_181493_cov_7.91373             | find gene functions from 54 unique genomic loci, source of orf1-encoding phage genome; Figure 3 Acr Seq | n/a           | No  | Yes | n/a                                     | n/a  | d_Bacteria; p_Firmicutes_A; c_Clostridia; o_Oscillospirales; f_Acutalibacteraceae; g_CAG-217 (inferred) | <a href="http://segatalab.cibio.unitn.it/data/Pasolli_et_al.html">http://segatalab.cibio.unitn.it/data/Pasolli_et_al.html</a> |
| 53 | XieH_2016_YSZC12003_35635_NODE_109_length_156568_cov_5.12141                   | find gene functions from 54 unique genomic loci                                                         | n/a           | No  | Yes | n/a                                     | n/a  | d_Bacteria; p_Firmicutes_A; c_Clostridia; o_Oscillospirales; f_Acutalibacteraceae; g_CAG-217 (inferred) | <a href="http://segatalab.cibio.unitn.it/data/Pasolli_et_al.html">http://segatalab.cibio.unitn.it/data/Pasolli_et_al.html</a> |
| 54 | ZeeviD_2015_PNP_Main_85_NODE_182_length_52997_cov_7.0000_ID_133080             | find gene functions from 54 unique genomic loci                                                         | n/a           | No  | Yes | n/a                                     | n/a  | d_Bacteria; p_Firmicutes_A; c_Clostridia; o_Oscillospirales; f_Acutalibacteraceae; g_CAG-217 (inferred) | <a href="http://segatalab.cibio.unitn.it/data/Pasolli_et_al.html">http://segatalab.cibio.unitn.it/data/Pasolli_et_al.html</a> |
| 55 | 4303_HeQ_2017_SZAXPI029570-85_bin.1_NODE_2_length_608092_cov_26.3259           | Figure 2                                                                                                | n/a           | Yes | No  | HeQ_2017_SZAXPI029570-85_bin.1          | 4303 | d_Bacteria; p_Firmicutes_A; c_Clostridia; o_Oscillospirales; f_Acutalibacteraceae; g_CAG-217            | <a href="http://segatalab.cibio.unitn.it/data/Pasolli_et_al.html">http://segatalab.cibio.unitn.it/data/Pasolli_et_al.html</a> |
| 56 | 4303_CosteaPI_2017_SID713B074-11-90-0_bin.57_NODE_18_length_238289_cov_5.37382 | Figure 2, source of orf1-encoding phage genome; Figure 3 Acr Seq                                        | n/a           | Yes | No  | CosteaPI_2017_SID713B074-11-90-0_bin.57 | 4303 | d_Bacteria; p_Firmicutes_A; c_Clostridia; o_Oscillospirales; f_Acutalibacteraceae; g_CAG-217            | <a href="http://segatalab.cibio.unitn.it/data/Pasolli_et_al.html">http://segatalab.cibio.unitn.it/data/Pasolli_et_al.html</a> |
| 57 | Clostridiales_bacterium_isolate_CIM:MAG_317_1_contig_8085                      | Figure 2, source of orf1-encoding phage genome                                                          | QALM0100002.1 | No  | No  | n/a                                     | n/a  | d_Bacteria; p_Firmicutes_A; c_Clostridia; o_Oscillospirales; f_Acutalibacteraceae; g_CAG-217 (inferred) | NCBI Genbank                                                                                                                  |
| 58 | TPA_asm:_Ruminococcaceae_bacterium_isolate_UBA8277_contig_226                  | Figure 2; Figure 3 Acr Seq                                                                              | DPDR0100010.1 | No  | No  | n/a                                     | n/a  | d_Bacteria; p_Firmicutes_A; c_Clostridia; o_Oscillospirales; f_Acutalibacteraceae; g_CAG-217 (inferred) | NCBI Genbank                                                                                                                  |
| 59 | KarlssonFH_2013_S424_NODE_2_length_526279_cov_9.22761                          | source of orf1-encoding phage genome                                                                    | n/a           | No  | Yes | n/a                                     | n/a  | d_Bacteria; p_Firmicutes_A; c_Clostridia; o_Oscillospirales; f_Acutalibacteraceae; g_CAG-217 (inferred) | <a href="http://segatalab.cibio.unitn.it/data/Pasolli_et_al.html">http://segatalab.cibio.unitn.it/data/Pasolli_et_al.html</a> |

|    |                                                                    |                                                                           |     |     |     |                          |      |                                                                                                               |                                                                                                                               |
|----|--------------------------------------------------------------------|---------------------------------------------------------------------------|-----|-----|-----|--------------------------|------|---------------------------------------------------------------------------------------------------------------|-------------------------------------------------------------------------------------------------------------------------------|
| 60 | XieH_2016__YSZC12003_36696_NODE_1_length_776477_cov_39.8546        | source of orf1-encoding phage genome, AcrIIA17 encoding phage (figure S8) | n/a | No  | Yes | n/a                      | n/a  | d__Bacteria; p__Firmicutes_A; c__Clostridia; o__Oscillospirales; f__Acutalibacteraceae; g__CAG-217 (inferred) | <a href="http://segatalab.cibio.unitn.it/data/Pasolli_et_al.html">http://segatalab.cibio.unitn.it/data/Pasolli_et_al.html</a> |
| 61 | XieH_2016__YSZC12003_37308R1_NODE_3_length_717276_cov_26.9646      | source of orf1-encoding phage genome                                      | n/a | No  | Yes | n/a                      | n/a  | d__Bacteria; p__Firmicutes_A; c__Clostridia; o__Oscillospirales; f__Acutalibacteraceae; g__CAG-217 (inferred) | <a href="http://segatalab.cibio.unitn.it/data/Pasolli_et_al.html">http://segatalab.cibio.unitn.it/data/Pasolli_et_al.html</a> |
| 62 | ZellerG_2014__CCIS88007743ST-4-0_NODE_31_length_210910_cov_8.07406 | source of orf1-encoding phage genome                                      | n/a | No  | Yes | n/a                      | n/a  | d__Bacteria; p__Firmicutes_A; c__Clostridia; o__Oscillospirales; f__Acutalibacteraceae; g__CAG-217 (inferred) | <a href="http://segatalab.cibio.unitn.it/data/Pasolli_et_al.html">http://segatalab.cibio.unitn.it/data/Pasolli_et_al.html</a> |
| 63 | 4303_QinN_2014__LD-22__bin.75_NODE_22_length_329763_cov_10.7401    | Figure 3 Acr Seq                                                          | n/a | Yes | No  | QinN_2014__LD-22__bin.75 | 4303 | d__Bacteria; p__Firmicutes_A; c__Clostridia; o__Oscillospirales; f__Acutalibacteraceae; g__CAG-217            | <a href="http://segatalab.cibio.unitn.it/data/Pasolli_et_al.html">http://segatalab.cibio.unitn.it/data/Pasolli_et_al.html</a> |
| 64 | ZellerG_2014__CCMD25963797ST-21-0_NODE_9_length_356111cov_10.1715  | Figure 3 Acr Seq                                                          | n/a | No  | Yes | n/a                      | n/a  | d__Bacteria; p__Firmicutes_A; c__Clostridia; o__Oscillospirales; f__Acutalibacteraceae; g__CAG-217 (inferred) | <a href="http://segatalab.cibio.unitn.it/data/Pasolli_et_al.html">http://segatalab.cibio.unitn.it/data/Pasolli_et_al.html</a> |
| 65 | ZellerG_2014__CCIS41222843ST-4-0_NODE_17_length_267133_cov_14.7383 | Figure 3 Acr Seq                                                          | n/a | No  | Yes | n/a                      | n/a  | d__Bacteria; p__Firmicutes_A; c__Clostridia; o__Oscillospirales; f__Acutalibacteraceae; g__CAG-217 (inferred) | <a href="http://segatalab.cibio.unitn.it/data/Pasolli_et_al.html">http://segatalab.cibio.unitn.it/data/Pasolli_et_al.html</a> |
| 66 | FengQ_2015__SID530168_NODE_20_length_224404_cov_6.02914            | Figure 3 Acr Seq                                                          | n/a | No  | Yes | n/a                      | n/a  | d__Bacteria; p__Firmicutes_A; c__Clostridia; o__Oscillospirales; f__Acutalibacteraceae; g__CAG-217 (inferred) | <a href="http://segatalab.cibio.unitn.it/data/Pasolli_et_al.html">http://segatalab.cibio.unitn.it/data/Pasolli_et_al.html</a> |
| 67 | FengQ_2015__SID530041_NODE_7_length_421742_cov_9.32571             | Figure 3 Acr Seq                                                          | n/a | No  | Yes | n/a                      | n/a  | d__Bacteria; p__Firmicutes_A; c__Clostridia; o__Oscillospirales; f__Acutalibacteraceae; g__CAG-217 (inferred) | <a href="http://segatalab.cibio.unitn.it/data/Pasolli_et_al.html">http://segatalab.cibio.unitn.it/data/Pasolli_et_al.html</a> |
| 68 | FengQ_2015__SID31223_NODE_13_length_228767_cov_7.50553             | Figure 3 Acr Seq                                                          | n/a | No  | Yes | n/a                      | n/a  | d__Bacteria; p__Firmicutes_A; c__Clostridia; o__Oscillospirales; f__Acutalibacteraceae; g__CAG-217 (inferred) | <a href="http://segatalab.cibio.unitn.it/data/Pasolli_et_al.html">http://segatalab.cibio.unitn.it/data/Pasolli_et_al.html</a> |



**Supplemental Table 4.** Plasmids used in this study. Supplemental Table S5 indicates genes expressed from pZE21\_tetR.

| Plasmid       | crRNA promoter, sequence (5'-3') | Notes                                                                                                                                                                                                                                                              | Refs                    | Purpose                                                            |
|---------------|----------------------------------|--------------------------------------------------------------------------------------------------------------------------------------------------------------------------------------------------------------------------------------------------------------------|-------------------------|--------------------------------------------------------------------|
| pZE21_tetR    | n/a                              | Contains tetR behind pLac promoter for inducible expression of candidate Acrs. Targeted by crRNA_A; PAM = AGG.                                                                                                                                                     | (Forsberg et al., 2019) | Expressing genes to test <i>in vivo</i> anti-CRISPR activity       |
| pSpyCas9_crA  | pJ23100, GTTCATTCAGGG CACCGGAC   | Arabinose-inducible SpyCas9 with pZE21 targeting pZE21_tetR                                                                                                                                                                                                        | (Forsberg et al., 2019) | Target pZE21_tetR for elimination with SpyCas9                     |
| pSpyCas9_crMu | pJ23100, GTAATACTTGTC CCGCAAAG   | Mu-targeting spacer for phage Mu immunity testing. Otherwise identical to pSpyCas9_crA                                                                                                                                                                             | (Forsberg et al., 2019) | Phage Mu immunity testing                                          |
| pSpyCa9_crNT  | pJ23100, GAACGAAAAGCT GCGCCGGG   | non-targeting spacer used as control. Otherwise identical to pSpyCas9_crA                                                                                                                                                                                          | (Forsberg et al., 2019) | Phage Mu immunity testing, Western blots                           |
| pCloDF13_GFP  | pJ23100, GAACGAAAAGCT GCGCCGGG   | eGFP gene replaces <i>spyCas9</i> in pSpyCas9_crA                                                                                                                                                                                                                  |                         | Measure generic protein expression from pSpyCas9 expression vector |
| pIDTsmart     | n/a                              | Plasmid used for <i>in-vitro</i> SpyCas9 digestion. Sequence available at: <a href="https://www.idtdna.com/pages/products/genes-and-gene-fragments/custom-gene-synthesis">https://www.idtdna.com/pages/products/genes-and-gene-fragments/custom-gene-synthesis</a> |                         | Plasmid template for <i>in-vitro</i> nuclease reactions            |

**Supplemental Table 5.** Gene sequences used in this study.

| Gene Name            | Sequence                                                                                                                                                                                                                                                                                                                                                                                                                                                                                                                                                                                                                                                                                                                                                                                                                                                                                                                                                                                                                                                                                                                                                                                                                                                                                                                                                                                                                                                                                                                                                                | Notes                                                                                                                                                         |
|----------------------|-------------------------------------------------------------------------------------------------------------------------------------------------------------------------------------------------------------------------------------------------------------------------------------------------------------------------------------------------------------------------------------------------------------------------------------------------------------------------------------------------------------------------------------------------------------------------------------------------------------------------------------------------------------------------------------------------------------------------------------------------------------------------------------------------------------------------------------------------------------------------------------------------------------------------------------------------------------------------------------------------------------------------------------------------------------------------------------------------------------------------------------------------------------------------------------------------------------------------------------------------------------------------------------------------------------------------------------------------------------------------------------------------------------------------------------------------------------------------------------------------------------------------------------------------------------------------|---------------------------------------------------------------------------------------------------------------------------------------------------------------|
| <i>acrIIA22wt</i>    | ATGGTAGTAGAAGAGACGCGGGATTTAGCCGAAACTGCGGATTGTGTAGTGATCGAAGCCATTTTAGTGGATGACGG<br>ATTGCGTTACAGACAGCTTTCTGTGCGCATCAAAGACGAAAACGGCGACATTATTCGTATCGTCCCTATTTCAACCGTT<br>CTGATCTAG                                                                                                                                                                                                                                                                                                                                                                                                                                                                                                                                                                                                                                                                                                                                                                                                                                                                                                                                                                                                                                                                                                                                                                                                                                                                                                                                                                                           | The italicized six base pairs were deleted in the $\Delta 2aa$ truncation mutant                                                                              |
| <i>acrIIA22-null</i> | ATGGTAGTAGAAGAGACGCGGGATTTAGCCGAAACTGCGGATTGTGTAGTGATCGAAGCCATTT <b><u>A</u></b> AGTGGATGACGG<br>ATTGCGTTACAGACAGCTTTCTGTGCGCATCAAAGACGAAAACGGCGACATTATTCGTATCGTCCCTATTTCAACCGTT<br>CTGATCTAG                                                                                                                                                                                                                                                                                                                                                                                                                                                                                                                                                                                                                                                                                                                                                                                                                                                                                                                                                                                                                                                                                                                                                                                                                                                                                                                                                                           | Mutation to introduce early stop codon in bold, underline                                                                                                     |
| <i>acrIIA22a</i>     | ATGGTCATAGAAGAGACGCGGGATTTAGCTGAAACTGCGGATTGTGTAGTGATCGAAGCCATTTTAGTGGATGACGGA<br>TTGCGTTACAAACAGCTTTCCGTGCGCATCAAAGACGAAAACGGTGACATTATTCGTATCGTCCCTATTTCAACCGTTC<br>TGATCTAG                                                                                                                                                                                                                                                                                                                                                                                                                                                                                                                                                                                                                                                                                                                                                                                                                                                                                                                                                                                                                                                                                                                                                                                                                                                                                                                                                                                           | Same amino acid sequence as NCBI protein CDB51368.1                                                                                                           |
| <i>acrIIA22b</i>     | ATGATTGTGGAAGATACCAAAGATTTGGTTGAAACTGCGGACTATGTGATCATCGAAGCTGTTTAGTGGATGATGGAT<br>TGGCTTACAAACAACCTTTCTGTTGGCATTAAAGCCAAAAATGGTGACATTATCCGCATAATTCCAATATCGACAATGCT<br>GATGTAA                                                                                                                                                                                                                                                                                                                                                                                                                                                                                                                                                                                                                                                                                                                                                                                                                                                                                                                                                                                                                                                                                                                                                                                                                                                                                                                                                                                           |                                                                                                                                                               |
| <i>acrIIA22c</i>     | ATGAAAATGATTGTGGAAGATACGAAAGATCTGGTAGAAACGGACGATTATGTAATCATTGAAGCGACTTTGTGACAG<br>GGCGATTTGTTGTTGTGCAAATTGCCGTGGGCATTCCGAACGAAGTGGGCGACATTGTTGATTTATTTCCATTTCC<br>ACCAACCCAATCTAA                                                                                                                                                                                                                                                                                                                                                                                                                                                                                                                                                                                                                                                                                                                                                                                                                                                                                                                                                                                                                                                                                                                                                                                                                                                                                                                                                                                       | Same amino acid sequence as NCBI protein CDB51757.1                                                                                                           |
| <i>purF</i>          | ATGTTTCGATAGTTTGCACGAGGAATGCGGTGTTTTCGGCCGATTTTAAAATCAGACCACTACGGTGGCCAGACGGC<br>GTATCTGGCTCTGTTTGCCTTGCAGCACAGAGGGCAGGAGAGTTGCGGCATTGCCGTGAATGACGACGGCGTGTTC<br>GCCACCATCGGGGCGACGGACTGGTGCCGGATGTGTTTAGCAAGGAGCAGCTGGCTGCCCTGGGTACAGGTAATAT<br>GGCCATCGGTTCATGTGCGCTACTCCACCACCGGCGGCAAAAACGCCAACAATATTCAGCCCCTGGTCAATTCGCATA<br>TTAAGGGTAATTTGGCGGTGGCACATAACGGCAATTTGGTAAACGCCCCGAGCTGCGCCGCCAGTTTGAGCTGAAG<br>GGCGCCATTTTTCACGGCACATCGGACACCGAGTCCATTGCCTATTCTATTGTAGAGGAGCGCCTGCACAGTAAGAG<br>CACGGAAGAGGGCCATCGAAAAAATCATGCCCGGGCTGCAAGGGGCATTCTTTGCGTGGTGATGACTGCCACCAAAC<br>TCATTGCGTTTCGTGACCCCAACGGCTTTCCGGCTCTTTGCCTGGGTAAGACTGCGGACGATGCTTATGTGGTGGCG<br>TCGAGAGTTGTGCGCTGGATTCCATCGGCGCCCACTTTGTGCGGAATATTGCTCCCGGCGAGATCGTTGTGATCAG<br>CAAGGATGGCGTGCGCTCTATTACCACCCATTGCGGCGGACTACGCCACATTTGTGTGTTGAGTACATCTATTTTGC<br>TCGGCCGGACAGTGTGATTGAGGGCGTGTCTGTGACGACGCCAGAATGCGGGCCGGTGCCTACCTGGCGAAGGA<br>ACACCCGGTAGACGCGGATATTGTCATCGGCGTGGCGGACAGCGGCTGGACGCGCCCTTGGGCTATGCCAGGAG<br>AGCGGCATTCTTACGGTATTGGATTATCAAGAACCCTACATCGGCCGACGCTTTATTACGCTACCCAAGGTCAG<br>CGTGAGGACGCGGTGAAGATCAAGCTGAATGTACTGCGAGAGAATATCAAGGGCAAGCGGGTGGTGATGATCGATG<br>ACTCTATTGTTGCGGGCACCACCAGCGCTCGGATTGTGACGCTGCTGCGAGAGGCCGGCGCCACCAGGATGCATAT<br>GCGGGTTTCTGCCCTCCGTTTCCGGCATCCTTGCTTCTTTGGAACGGACATTGATAGCGAAGAAAACCTGATTGCATG<br>CAAATTTACGAAATTTCTGAAATTTCTTGCCAAATTAGGGGTTGACAGCTTGGGGTATCTTAGTGTAAAATCTACTCAC<br>GAACTTGCGAAGGAGTCCGGATTTCGATTTTTGCGACGTTGCTTACCCGGCCATTATCCCATCCCCACCCCGAAGCA<br>ACAGTCCAAGGATAAGTTGAGGAAAAGCTGAATCAGTCTCTCTTACTACCAGGTCTTGGATTAA | Flanks <i>acrIIA22</i> -encoding bacterial genomic islands. Used as bait to retrieve additional examples of this locus for genomic and evolutionary analyses. |
| <i>radC</i>          | ATGCGTGCCGCTTATCTGCAAGGCGGCGGCGACGCTATGCCGGACCACAGTTGCTGGAATTGCTGCTGTCCATCAG<br>CATTCCCCGCAGAGATGTAAGCCCATTTGCCTATGCGCTCATTAAACCGCTTCGGCTCGTGGAGCAGGTGTTTGCCG<br>CCGGCGCAGCAGATCTGCAACAAGTGCCGGGCGTCCGGCAACAGACCGCCGTACAGATTCTGCTGGTACGGGATCT<br>GAACCGGCGGATCCATCAAATCAAACAACCGGTCAAGCACCTGACAGATGCCACCCAGTCTGCGCCTACTTTTC<br>CAATCTGTTACGGGACAAAACCGCCGAGCAGGTGACTTGGTACCCTGGACGGCAGTGCCAAAATCCTGCAAACCC<br>ACGCCGTAGGCAGCGGACGCTCAACCTGGCCTCTGTGGATCAGCGCACTTTGATGGAACATATTTCTGCGAGACAAC<br>GCCAACGCTGTTATGCTGGCACACAACCATCCCGGCGGCAAGGCCAGCCCTCTGCGCAGGATCTGGAATTCACCAT<br>TCGTCTGCTTTCCATTCTGCGTTCATTATGTGACGCTGCTGGATCATATTATCGTCAGTCTACCGACACCTACTCC<br>ATGCGCAGCGACCCGGAGTACGGCAGCTTCTTACCCTCAAATAA                                                                                                                                                                                                                                                                                                                                                                                                                                                                                                                                                                                                                                                                                                                                                                                                                                                             | Flanks <i>acrIIA22</i> -encoding bacterial genomic islands. Used as bait to retrieve additional examples of this locus for genomic and evolutionary analyses. |
| <i>acrIIA4</i>       | ATGAATATTAACGATTTGATCCGTGAGATTAAGAATAAGGATTACTGTCAAATGTCCGGGACAGATTCCAATTTCTAT<br>TACACAATTAATCATCCGTGTGAATAACGATGTAATGAGTATGTCATCTGTAATCAGAAAACGAGACATCGTAGAA<br>AAGTTTCATCAGTGCCCTTCAAGAACGGGTGGAACCAAGAGATGAAGATGAGGAGGAATTTACAATGATATGCAGACA<br>ATTACGCTTAAATCAGAATTGAATTA                                                                                                                                                                                                                                                                                                                                                                                                                                                                                                                                                                                                                                                                                                                                                                                                                                                                                                                                                                                                                                                                                                                                                                                                                                                                                          | Discovered by (Rauch et al., 2017)                                                                                                                            |

## References for Supplemental Tables.

- An, S.Y., Ka, D., Kim, I., Kim, E.-H., Kim, N.-K., Bae, E., and Suh, J.-Y. (2020). Intrinsic disorder is essential for Cas9 inhibition of anti-CRISPR AcrIIA5. *Nucleic Acids Research* *48*, 7584-7594.
- Athukoralage, J.S., McMahon, S.A., Zhang, C., Gruschow, S., Graham, S., Krupovic, M., Whitaker, R.J., Gloster, T.M., and White, M.F. (2020). An anti-CRISPR viral ring nuclease subverts type III CRISPR immunity. *Nature* *577*, 572-575.
- Bhoobalan-Chitty, Y., Johansen, T.B., Di Cianni, N., and Peng, X. (2019). Inhibition of Type III CRISPR-Cas Immunity by an Archaeal Virus-Encoded Anti-CRISPR Protein. *Cell* *179*, 448-458 e411.
- Bondy-Denomy, J., Garcia, B., Strum, S., Du, M., Rollins, M.F., Hidalgo-Reyes, Y., Wiedenheft, B., Maxwell, K.L., and Davidson, A.R. (2015). Multiple mechanisms for CRISPR-Cas inhibition by anti-CRISPR proteins. *Nature* *526*, 136-139.
- Bondy-Denomy, J., Pawluk, A., Maxwell, K.L., and Davidson, A.R. (2013). Bacteriophage genes that inactivate the CRISPR/Cas bacterial immune system. *Nature* *493*, 429-432.
- Chowdhury, S., Carter, J., Rollins, M.F., Golden, S.M., Jackson, R.N., Hoffmann, C., Nosaka, L., Bondy-Denomy, J., Maxwell, K.L., Davidson, A.R., *et al.* (2017). Structure Reveals Mechanisms of Viral Suppressors that Intercept a CRISPR RNA-Guided Surveillance Complex. *Cell* *169*, 47-57 e11.
- Dong, Guo, M., Wang, S., Zhu, Y., Wang, S., Xiong, Z., Yang, J., Xu, Z., and Huang, Z. (2017). Structural basis of CRISPR-SpyCas9 inhibition by an anti-CRISPR protein. *Nature* *546*, 436-439.
- Eitzinger, S., Asif, A., Watters, K.E., Iavarone, A.T., Knott, G.J., Doudna, J.A., and Minhas, F. (2020). Machine learning predicts new anti-CRISPR proteins. *Nucleic Acids Res* *48*, 4698-4708.
- Forsberg, K.J., Bhatt, I.V., Schmidtke, D.T., Javanmardi, K., Dillard, K.E., Stoddard, B.L., Finkelstein, I.J., Kaiser, B.K., and Malik, H.S. (2019). Functional metagenomics-guided discovery of potent Cas9 inhibitors in the human microbiome. *Elife* *8*.
- Fuchsbaauer, O., Swuec, P., Zimberger, C., Amigues, B., Levesque, S., Agudelo, D., Durringer, A., Chaves-Sanjuan, A., Spinelli, S., Rousseau, G.M., *et al.* (2019). Cas9 Allosteric Inhibition by the Anti-CRISPR Protein AcrIIA6. *Mol Cell* *76*, 922-937 e927.
- Garcia, B., Lee, J., Edraki, A., Hidalgo-Reyes, Y., Erwood, S., Mir, A., Trost, C.N., Seroussi, U., Stanley, S.Y., Cohn, R.D., *et al.* (2019). Anti-CRISPR AcrIIA5 Potently Inhibits All Cas9 Homologs Used for Genome Editing. *Cell Rep* *29*, 1739-1746 e1735.
- Guo, T.W., Bartesaghi, A., Yang, H., Falconieri, V., Rao, P., Merk, A., Eng, E.T., Raczkowski, A.M., Fox, T., Earl, L.A., *et al.* (2017). Cryo-EM Structures Reveal Mechanism and Inhibition of DNA Targeting by a CRISPR-Cas Surveillance Complex. *Cell* *171*, 414-426 e412.
- He, F., Bhoobalan-Chitty, Y., Van, L.B., Kjeldsen, A.L., Dedola, M., Makarova, K.S., Koonin, E.V., Brodersen, D.E., and Peng, X. (2018). Anti-CRISPR proteins encoded by archaeal lytic viruses inhibit subtype I-D immunity. *Nat Microbiol* *3*, 461-469.
- Hirschi, M., Lu, W.T., Santiago-Frangos, A., Wilkinson, R., Golden, S.M., Davidson, A.R., Lander, G.C., and Wiedenheft, B. (2020). AcrIF9 tethers non-sequence specific dsDNA to the CRISPR RNA-guided surveillance complex. *Nat Commun* *11*, 2730.
- Janowski, R., and Niessing, D. (2020). The large family of PC4-like domains - similar folds and functions throughout all kingdoms of life. *RNA Biol* *17*, 1228-1238.
- Jiang, F., Liu, J.J., Osuna, B.A., Xu, M., Berry, J.D., Rauch, B.J., Nogales, E., Bondy-Denomy, J., and Doudna, J.A. (2019). Temperature-Responsive Competitive Inhibition of CRISPR-Cas9. *Mol Cell* *73*, 601-610 e605.
- Knott, G.J., Cress, B.F., Liu, J.J., Thornton, B.W., Lew, R.J., Al-Shayeb, B., Rosenberg, D.J., Hammel, M., Adler, B.A., Lobba, M.J., *et al.* (2019a). Structural basis for AcrVA4 inhibition of specific CRISPR-Cas12a. *Elife* *8*.

- Knott, G.J., Thornton, B.W., Lobba, M.J., Liu, J.J., Al-Shayeb, B., Watters, K.E., and Doudna, J.A. (2019b). Broad-spectrum enzymatic inhibition of CRISPR-Cas12a. *Nat Struct Mol Biol* 26, 315-321.
- Lee, J., Mir, A., Edraki, A., Garcia, B., Amrani, N., Lou, H.E., Gainetdinov, I., Pawluk, A., Ibraheim, R., Gao, X.D., *et al.* (2018). Potent Cas9 Inhibition in Bacterial and Human Cells by AcrIIIC4 and AcrIIIC5 Anti-CRISPR Proteins. *mBio* 9.
- Leon, L.M., Park, A.E., Borges, A.L., Zhang, J.Y., and Bondy-Denomy, J. (2020). Mobile element warfare via CRISPR and anti-CRISPR in *Pseudomonas aeruginosa*. *bioRxiv*, 2020.2006.2015.151498.
- Lin, P., Qin, S., Pu, Q., Wang, Z., Wu, Q., Gao, P., Schettler, J., Guo, K., Li, R., Li, G., *et al.* (2020). CRISPR-Cas13 Inhibitors Block RNA Editing in Bacteria and Mammalian Cells. *Mol Cell* 78, 850-861 e855.
- Liu, L., Yin, M., Wang, M., and Wang, Y. (2019). Phage AcrIIA2 DNA Mimicry: Structural Basis of the CRISPR and Anti-CRISPR Arms Race. *Mol Cell* 73, 611-620 e613.
- Mahendra, C., Christie, K.A., Osuna, B.A., Pinilla-Redondo, R., Kleinstiver, B.P., and Bondy-Denomy, J. (2020). Broad-spectrum anti-CRISPR proteins facilitate horizontal gene transfer. *Nat Microbiol* 5, 620-629.
- Marino, N.D., Zhang, J.Y., Borges, A.L., Sousa, A.A., Leon, L.M., Rauch, B.J., Walton, R.T., Berry, J.D., Joung, J.K., Kleinstiver, B.P., *et al.* (2018). Discovery of widespread Type I and Type V CRISPR-Cas inhibitors. *Science*.
- Meeske, A.J., Jia, N., Cassel, A.K., Kozlova, A., Liao, J., Wiedmann, M., Patel, D.J., and Marraffini, L.A. (2020). A phage-encoded anti-CRISPR enables complete evasion of type VI-A CRISPR-Cas immunity. *Science* 369, 54-59.
- Osuna, B.A., Karambelkar, S., Mahendra, C., Christie, K.A., Garcia, B., Davidson, A.R., Kleinstiver, B.P., Kilcher, S., and Bondy-Denomy, J. (2020). *Listeria* Phages Induce Cas9 Degradation to Protect Lysogenic Genomes. *Cell Host Microbe* 28, 31-40 e39.
- Pasolli, E., Asnicar, F., Manara, S., Zolfo, M., Karcher, N., Armanini, F., Beghini, F., Manghi, P., Tett, A., Ghensi, P., *et al.* (2019). Extensive Unexplored Human Microbiome Diversity Revealed by Over 150,000 Genomes from Metagenomes Spanning Age, Geography, and Lifestyle. *Cell* 176, 649-662 e620.
- Pawluk, A., Amrani, N., Zhang, Y., Garcia, B., Hidalgo-Reyes, Y., Lee, J., Edraki, A., Shah, M., Sontheimer, E.J., Maxwell, K.L., *et al.* (2016). Naturally Occurring Off-Switches for CRISPR-Cas9. *Cell* 167, 1829-1838 e1829.
- Pawluk, A., Bondy-Denomy, J., Cheung, V.H., Maxwell, K.L., and Davidson, A.R. (2014). A new group of phage anti-CRISPR genes inhibits the type I-E CRISPR-Cas system of *Pseudomonas aeruginosa*. *MBio* 5, e00896.
- Pawluk, A., Shah, M., Mejdani, M., Calmettes, C., Moraes, T.F., Davidson, A.R., and Maxwell, K.L. (2017). Disabling a Type I-E CRISPR-Cas Nuclease with a Bacteriophage-Encoded Anti-CRISPR Protein. *MBio* 8.
- Pinilla-Redondo, R., Shehreen, S., Marino, N.D., Fagerlund, R.D., Brown, C.M., Sørensen, S.J., Fineran, P.C., and Bondy-Denomy, J. (2020). Discovery of multiple anti-CRISPRs uncovers anti-defense gene clustering in mobile genetic elements. *bioRxiv*, 2020.2005.2022.110304.
- Rauch, B.J., Silvis, M.R., Hultquist, J.F., Waters, C.S., McGregor, M.J., Krogan, N.J., and Bondy-Denomy, J. (2017). Inhibition of CRISPR-Cas9 with Bacteriophage Proteins. *Cell* 168, 150-158 e110.
- Shin, J., Jiang, F., Liu, J.-J., Bray, N.L., Rauch, B.J., Baik, S.H., Nogales, E., Bondy-Denomy, J., Corn, J.E., and Doudna, J.A. (2017). Disabling Cas9 by an anti-CRISPR DNA mimic. *Science Advances* 3.
- Song, G., Zhang, F., Zhang, X., Gao, X., Zhu, X., Fan, D., and Tian, Y. (2019). AcrIIA5 Inhibits a Broad Range of Cas9 Orthologs by Preventing DNA Target Cleavage. *Cell Rep* 29, 2579-2589 e2574.
- Stanley, S.Y. (2018). An Investigation of Bacteriophage Anti-CRISPR and Anti-CRISPR Associated Proteins. In Department of Molecular Genetics (<http://hdl.handle.net/1807/97883>: University of Toronto), pp. 120.

- Uribe, R.V., van der Helm, E., Misiakou, M.A., Lee, S.W., Kol, S., and Sommer, M.O.A. (2019). Discovery and Characterization of Cas9 Inhibitors Disseminated across Seven Bacterial Phyla. *Cell Host Microbe* 25, 233-241 e235.
- Wang, J., Ma, J., Cheng, Z., Meng, X., You, L., Wang, M., Zhang, X., and Wang, Y. (2016a). A CRISPR evolutionary arms race: structural insights into viral anti-CRISPR/Cas responses. *Cell Res* 26, 1165-1168.
- Wang, X., Yao, D., Xu, J.G., Li, A.R., Xu, J., Fu, P., Zhou, Y., and Zhu, Y. (2016b). Structural basis of Cas3 inhibition by the bacteriophage protein AcrF3. *Nat Struct Mol Biol* 23, 868-870.
- Watters, K.E., Fellmann, C., Bai, H.B., Ren, S.M., and Doudna, J.A. (2018). Systematic discovery of natural CRISPR-Cas12a inhibitors. *Science*.
- Watters, K.E., Shivram, H., Fellmann, C., Lew, R.J., McMahon, B., and Doudna, J.A. (2020). Potent CRISPR-Cas9 inhibitors from *Staphylococcus* genomes. *Proc Natl Acad Sci U S A* 117, 6531-6539.
- Yang, H., and Patel, D.J. (2017). Inhibition Mechanism of an Anti-CRISPR Suppressor AcrIIA4 Targeting SpyCas9. *Mol Cell* 67, 117-127 e115.
- Zhang, H., Li, Z., Daczkowski, C.M., Gabel, C., Mesecar, A.D., and Chang, L. (2019). Structural Basis for the Inhibition of CRISPR-Cas12a by Anti-CRISPR Proteins. *Cell Host Microbe* 25, 815-826 e814.
- Zhang, K., Wang, S., Li, S., Zhu, Y., Pintilie, G.D., Mou, T.C., Schmid, M.F., Huang, Z., and Chiu, W. (2020). Inhibition mechanisms of AcrF9, AcrF8, and AcrF6 against type I-F CRISPR-Cas complex revealed by cryo-EM. *Proc Natl Acad Sci U S A* 117, 7176-7182.
